# Supplementary material
Source: HighWire-hosted journal article supplement (https://bjsm.bmj.com/content/51/22/1611)
Supplement: inline-supplementary-material-1 [file inline-supplementary-material-1.docx]

APPENDIX 1

Element 1: Groin Pain

#1 Groin [MESH terms] (**3123)**

#2 Pubic Symphysis[MESH terms] OR Pubic Bone [MESH terms] (**2983)**

#3 groin[Text Word] (**9880)**

#4 "Pubic Bone*" [Text Word] **(1982)**

#5 Adductor* [TEXT word] OR Psoas [TEXT word] OR iliopsoas [TEXT word]

or gracilis [TEXT word] OR rectus abdominis [TEXT word]

OR abdominal [TEXT word) (**285284)** #6 #6Search #1 OR #2 OR #3 OR #4 or #5 (**296588)**

#7 Pain [MESH terms] OR Abdominal Pain [MESH terms]

OR Pelvic Pain [MESH terms] (**315188)**

#8 Tendon Injuries [MESH terms] (**14600)**

#9 Wounds and injuries [MESH] (**724395)**

#10 Sprains and strains [MESH] (**14837)** #11 Tear [MESH] (**8963)**

#12 Athletic Injuries [MESH terms] (**21082)**

#13 Tendinopathy (MESH) OR tendinopath* [TEXT Word]

OR tendonopath* [TEXT Word] OR tendinitis [TEXT Word] OR

tendonitis [TEXT Word] OR pain [TEXT WORD] (**51795)** #14 search #7 OR #8 OR #9 OR #10 OR #11 OR #12

OR #13 (**1275020)**

#15 search #6 AND #14 ( **93271)** #16 Osteitis [MESH terms] ` (**2745)**

#17 Hernia, inguinal [MESH] OR Hernia, abdominal [MESH] (**21797)**

#18 symphysis syndrome [TEXT word] **(3)**

#19 "groin pain" [tiab] (**1035)**

#20 osteitis pubis [TEXT word] (**298)**

#21 pubalgia [TEXT word] (**62)**

#22 adductor tendinopath* [TEXT word] OR adductor tendonopath* [text word**] (9)**

#23 adductor tendinitis [TEXT word] OR adductor tendonitis [text word] (**11)**

#24 adductor strain [TEXT word] (**14)**

#25 gracilis syndrome [TEXT word] ( **5)**

#26 sports hernia [TEXT word] OR sportsman* hernia [TEXT word]

OR sportsmen* hernia [TEXT word] OR sportsmen* groin

OR sportsman* groin [TEXT word] (**102)**

#27 "acetabular labrum" AND tear* (**138)**

#28 "labrum tear" AND hip   (**9)**

#29 "labral tear" AND hip (**191)**

#30 femoral neck stress fracture[TEXT word] (**49)**

#31 femoroacetabular impingement [TEXT word] (**1064)**

#32 pubic bone stress [TEXT word] (**3)**

#33 abdominal strain [text word] **(37)**

#34 search #16 OR #17 OR #18 OR #19 OR #20 OR #21 OR #22 OR #23 OR

#24 OR #25 OR #26 OR #27 OR #28 OR #29 OR #30 OR #31OR #32 OR #33 (**26715** )

#35 search #15 OR #34 (**117189)**

Element 2: Hip Range of Motion

#36 Range of Motion, articular [MESH] (**35122)**

#37 Range of motion [TIAB word] (**20901)**

#38 Range of movement [TIAB word] (**2046)**

#39 ROM [TIAB word] (**6586)**

#40 flexibility [TIAB] (**46089)**

#41 search #36 OR #37 OR #38 OR #39 OR #40 (**95583**

#42 Hip [MESH terms] (**9905)**

#43 Hip Joint [MESH terms] (**21508)**

#44 hip [Tiab] OR hip joint* [tiab] (**98576)**

#45 search #42 OR #43 or #44 (**107039)**

#46 search #41 AND #45 (**6060)**

#47 "hip flexibility"[tiab] (**32)**

#48 "hip mobility"[tiab] (**87)**

#49 "hip range of motion" [tiab] (**289)**

#50 “muscle flexibility”[tiab] (**88)**

#51 search #47 OR #48 OR #49 OR #50 (**485)**

#52 search #46 OR #51 (**6182)**

#53 search # 35 AND #52 (**424)**

Element 3: Risk Factors/Association

#54 risk factors [MESH terms] (**586066)**

#55 risk assessment [MESH terms] (**184656)**

#56 association [MESH terms] (**11859)**

#57 risk* [tiab] OR association [Tiab word] (**1997214)**

# 58 incidence [MESH] (**182526)**

#59 "Epidemiologic Studies"[Mesh] OR epidemiology (**2618791)**

#60 “cohort studies” [MESH terms] OR cohort study  **(1435293)**

#61 “case control studies” [Mesh terms] OR case control study) (**718962)**

#62 “cross-sectional studies”[MESH terms] OR cross-sectional studies  **(213567)**

#63 search #54 OR #55 OR #56 OR #57 OR #58 OR #59 or #60 OR #61

OR #62 (**4063538)**

#64 search #53 and #63 **(234)**
