# Supplementary material
Source: HighWire-hosted journal article supplement (https://bjsm.bmj.com/content/51/22/1611)
Supplement: inline-supplementary-material-3 [file inline-supplementary-material-3.docx]

**Reference List**

(1) Abadie P, Labanere C, Reboul G. Arthroscopic treatment of femoro-acetabular impigment. [French]. Journal de Traumatologie du Sport 30 (1) ()(pp 17-23), 2013 Date of Publication: March 2013 2013;(1):17-23. Ref ID: 316 Abstract: Femoro-acetabular impingment was " the" diagnosis to seek to a mechanical groin pain in a young population involved in athletic activities. It was based on a combination of clinical and paraclinical exams, researching mechanical elements (femoral cam and acetabular pincer). Impingment test was performed by provoking pain with flexion, adduction and internal rotation, but its specificity was low. A radiographic assessment of the pelvis and femoral neck profile (Dunn or Ducroquet) was essential. Injected imaging (arthro-CT or arthro-MRI) complemented this assessment by evaluating labrum and cartilage. This diagnosis could be sensitized by an anesthesic test because adductor tendinopathy or parietal failure can coexist. Hip arthroscopy was a reliable technique. It was effective on pain and improve function of athletes who returned to their activities. Morbidity of this surgery was very low even though risk of pudendal neurapraxia (2%). Recent dismemberment of this disease and its treatment modalities needed to be evaluated by appropriate clinical tools (iHOT score). The prognosis was dominated by the risk of osteoarthritic degradation, which required a long-term follow-up. Â© 2013 Notes: DB - Embase UI - 2013204462 IN - (Abadie, Labanere, Reboul) Clinique du sport de Bordeaux-Merignac, 2 rue Negrevergne, 33700 Merignac, France CP - France OT - Traitement arthroscopique du conflit femoro-acetabulaire LG - French PT - Journal: Short Survey EM - 201316 DD - 20130415

(2) Abdulkareem IH. Radiation-induced femoral head necrosis. Niger J Clin Pract 2013; 16(1):123-126. Ref ID: 616 Abstract: There are very few cases of radiation-induced femoral head necrosis described in the literature, therefore, this case will add new knowledge and highlights important aspects in the diagnosis and management of this uncommon condition. Our patient was 74 years old and presented with left hip and groin pain for 8 months, with no previous history of trauma or osteoarthritis. However, he had been treated for metastatic prostate cancer, to the pelvis and roof of the left acetabulum, with androgen ablation, and radiotherapy 5 years before presentation. Examination of the left hip revealed painful movements, but no restriction in the range of motion. Initial X-rays did not show any abnormalities, but MRI scan revealed a suspicious lesion in the roof of the left acetabulum, with no indication of secondary weakening of the femoral neck. The patient was therefore referred to the oncologists to consider radiotherapy, but they were not convinced it was metastatic, because he had no new urinary symptoms, and the PSA remained normal throughout this period. He was subsequently referred for a bone scan to look for possible secondary lesions (from the prostate gland), but this did not reveal any abnormal increased uptake. Three months later, he was reviewed in the clinic with a repeat X-ray of the pelvis which revealed complete destruction of the left femoral head and the acetabular roof, but CT-guided biopsy revealed no evidence of malignancy in the left hip. However, in view of the persistent pain and radiological evidence of left hip destruction, the patient had left Total Hip Replacement (THR), and excellent post-operative recovery. He mobilised fully, and was discharged on day five. Histology of the femoral head and hip capsule, revealed no evidence of metastasis from the prostate cancer, but confirmed osteonecrosis of the femoral head, presumably caused by the previous radiotherapy. MRI of the spine was clear and he was discharged to the oncologists and urologists for follow up Notes: DA - 20130204 IS - 1119-3077 (Print) LA - eng PT - Journal Article SB - IM

(3) Abolghasemian M, Gharanizadeh K, Kuzyk P, Masdari Z, Fakharian M, Safir O. Hips with synovial chondromatosis may display the features of femoroacetabular impingement. J Bone Joint Surg Am 2014; 96(2):e11. Ref ID: 588 Abstract: BACKGROUND: Both synovial chondromatosis and femoroacetabular impingement present with hip pain and may lead to hip osteoarthritis. We present a small case series and describe the clinical presentation, investigation, and treatment of patients with synovial chondromatosis who also had cam-type femoroacetabular impingement involving the same hip. METHODS: Five patients (four men and one woman with a mean age of thirty-four years [range, thirty to thirty-seven years]) with unilateral synovial chondromatosis of the hip presented with clinical and radiographic features of ipsilateral cam-type femoroacetabular impingement. The diagnosis of associated synovial chondromatosis was made on the basis of preoperative imaging in four of the cases. All patients were treated with surgical hip dislocation, excision of the synovial chondromatosis loose bodies, and reshaping of the femoral head-neck junction. RESULTS: These hips exhibited radiographic features that are not typically seen with idiopathic cam-type femoroacetabular impingement, including femoral head hypertrophy, lateralization of the femoral head, and haziness in the acetabular fossa. None of the hips showed signs of advanced osteoarthritis intraoperatively. The alpha angle improved from a mean of 72.4 degrees preoperatively to 42.6 degrees postoperatively. At a mean of twenty-two months of follow-up, the patients had a mean Harris hip score of 80.6, substantially improved from the preoperative value of 39. CONCLUSIONS: Hips with synovial chondromatosis may present with clinical and radiographic features resembling those of cam-type femoroacetabular impingement. As simultaneous treatment of both conditions is best accomplished with surgical hip dislocation rather than other, less-extensive surgical approaches, we recommend preoperative consideration of synovial chondromatosis in patients presenting with unilateral cam-type femoroacetabular impingement Notes: DA - 20140116 IS - 1535-1386 (Electronic) LA - eng PT - Journal Article SB - AIM SB - IM

(4) Agricola R, Heijboer M, Ginai A, Van Der HR, Verhaar J, Weinans H et al. The occurrence of cam impingement in young male soccer players. Osteoarthritis and Cartilage Conference: 2011 Osteoarthritis Research Society International World Congress, OARSI San Diego, CA United States Conference Start: 20110915 Conference End: 20110918 Conference Publication: (var pagings) 19 ()(pp S168-S169) 2011;(var.pagings):S168-S169. Ref ID: 415 Abstract: Purpose: Femoroacetabular Impingement (FAI) is a cause of hip pain and might cause osteoarthritis (OA) of the hip due to abnormal contact between the femoral neck and acetabulum. Cam impingement is a subtype of FAI, in which the abnormal contact is caused by a camtype deformity in the femoral head-neck junction. Cam impingement is mostly seen in young active males. However, no studies have focused on the presence of cam-type deformities during skeletal development. This study aimed to determine the age of onset and prevalence of cam-type deformities in young male soccer players versus non-athletic controls. Methods: 89 elite pre-professional soccer players and 90 controls aged 12-19 years were included in this study. In the soccer players group, both an anteroposterior (AP) and a Lauenstein radiograph of the hip were obtained according to a standardized protocol. Controls with both an AP and a Lauenstein radiograph with no signs of hip pathology were obtained from radiology databases. The alpha angle was calculated in all radiographs using semi-automatized software. An alpha angle larger than 60degree was considered to define a cam-type deformity. All radiographs were scored by an orthopedic surgeon and a radiologist, using a three-point scoring system. The anterosuperior head-neck junction was classified as normal (1), flattened (2) or having a prominence (3). The soccer players completed a questionnaire, and range of motion (ROM) and impingement tests were performed. Differences in prevalence were tested using logistic regression, corrected for age. Differences between the mean alpha angle in soccer players and the control group, and differences in the ROM between cam-type deformity cases and normal soccer players were tested using Generalized Estimating Equations, corrected for age. Results: The mean age was 14.8 years for the soccer players and 13.7 years for the controls. An alpha angle >60degree was first found at the age of 12 in some soccer players and controls. A cam-type deformity defined by alpha angle was more prevalent in soccer players (26%) than in controls (18%), though not significantly when corrected for age (Figure 1). (Figure presented) The mean alpha angle in the soccer players was larger than in controls in both the Lauenstein view (50.8 vs 46.8, p = 0.002), and the AP view (50.9degree vs 48.0degree p = 0.079). A prominence in the anterosuperior head-neck junction was first found at the age of 13 years and the prevalence was 13.5% in the soccer players. No prominences were found in the controls. A flattening of the head-neck junction was also more frequently found in the soccer players (53% vs 19%, p = 0.0001) (Figure 2). (Figure presented) Internal rotation was significantly reduced in soccer players with a camtype deformity defined by alpha angle (19.7 vs 26.2, p = 0.002), whereas a positive impingement test did not associate with the presence of a cam-type deformity. Conclusions: A cam-type deformity can be present and recognizable from the age of 13 years. Cam-type deformities are more prevalent, and more pronounced in young soccer players than in their non-athletic peers. This suggests that mechanical loads especially during the closure of the proximal femoral growth plate could be an important factor in the development of a cam-type deformity Notes: DB - Embase UI - 70571816 IN - (Agricola, Heijboer, Ginai, Van Der Heijden, Verhaar, Weinans, Waarsing) Erasmus Med. Ctr., Rotterdam, Netherlands (Weinans) Delft Univ. of Technology, Delft, Netherlands LG - English PT - Journal: Conference Abstract EM - 201100 DD - 20111105

(5) Agricola R, Bessems JHJM, Ginai AZ, Heijboer MP, van der Heijden RA, Verhaar JAN et al. The Development of Cam-Type Deformity in Adolescent and Young Male Soccer Players. American Journal of Sports Medicine 2012; 40(5):1099-1107. Ref ID: 70 Notes: IS - 5

(6) Agricola R, Heijboer M, Bierma-Zeinstra S, Verhaar J, Weinans H, Waarsing E. Cam impingement causes end-stage osteoarthritis of the hip: A nationwide prospective study (CHECK). HIP International Conference: 10th Congress of the European Hip Society, EHS 2012 Milan Italy Conference Start: 20120920 Conference End: 20120922 Conference Publication: (var pagings) 22 (4) ()(pp 443), 2012 Date of Publication: July-August 2012 2012;(var.pagings):443-August. Ref ID: 159 Abstract: Introduction: Cam impingement, due to hip incongruity by a non-spherical femoral head, is a common condition causing clinical complaints. This might be an important cause for hip osteoarthritis (OA), but no prospective studies on this topic exist. Objective: To determine the association between cam impingement and development of end-stage OA. Methods: CHECK is a nationwide prospective cohort study of 1002 early symptomatic OA patients (45-65 years) who were recruited by their general practitioner when they presented with first onset of pain complaints in hip or knee. Standardised anteroposterior (AP) pelvic radiographs were obtained at baseline, and at 2 and 5 years follow-up. Asphericity of the femoral head was measured by the alpha angle. Clinically, impingement was defined as decreased internal hip rotation (< 20degree). The strength of association between cam impingement parameters at baseline and the development of end-stage OA (total hip replacement within 5 years) was expressed in odds ratios (ORs) using Generalised Estimating Equations. Results: At baseline, 76% of the included hips had no radiographic signs of OA (K&L = 0) and 24% doubtful OA (K&L = 1). Within five years 2.48% developed end-stage OA. A moderate (alpha angle >60degree) and severe (alpha angle >83degree) cam-type deformity resulted in adjusted ORs of 3.91 (95% CI 1.71-8.94) and 10.88 (95% CI 5.21-22.69), respectively, for end-stage OA. The combination of severe cam-type deformity and decreased internal rotation at baseline resulted in adjusted ORs of 27.45 (95% CI 7.64-98.55), and in a positive predictive value of 47.4% for end-stage OA. Conclusion: When presenting with first onset of pain complaints, individuals with both severe cam-type deformity and reduced internal rotation are strongly predisposed to a fast progression to end-stage OA. Because a cam-type deformity can be diagnosed before OA is present, this might allow to initiate novel treatment protocols to prevent hip OA in these patients. Cam impingement might be the primary reason for development of hip OA Notes: DB - Embase UI - 71960167 IN - (Agricola, Heijboer, Verhaar, Weinans, Waarsing) Department of Orthopaedics, Erasmus University Medical Center, Rotterdam, Netherlands (Bierma-Zeinstra) Department of General Practice, Erasmus University Medical Center, Rotterdam, Netherlands LG - English PT - Journal: Conference Abstract EM - 201532 DD - 20150728

(7) Agricola R, Heijboer MP, Bierma-Zeinstra SMA, Verhaar JAN, Weinans H, Waarsing JH. Cam impingement causes osteoarthritis of the hip: A nationwide prospective cohort study (CHECK). Annals of the Rheumatic Diseases 72 (6) ()(pp 918-923), 2013 Date of Publication: June 2013 2013;(6):918-923. Ref ID: 312 Abstract: Objective: To determine the association between cam impingement, which is hip incongruity by a non-spherical femoral head and development of osteoarthritis. Methods: A nationwide prospective cohort study of 1002 early symptomatic osteoarthritis patients (CHECK), of which standardised anteroposterior pelvic radiographs were obtained at baseline and at 2 and 5 years follow-up. Asphericity of the femoral head was measured by the alpha angle. Clinically, decreased internal hip rotation (<20degree) is suggestive of cam impingement. The strength of association between those parameters at baseline and development of incident osteoarthritis (K&L grade 2) or end-stage osteoarthritis (K&L grades 3, 4, or total hip replacement) within 5 years was expressed in OR using generalised estimating equations. Results: At baseline, 76% of the included hips had no radiographic signs of osteoarthritis and 24% doubtful osteoarthritis. Within 5 years, 2.76% developed endstage osteoarthritis. A moderate (alpha angle >60degree) and severe (alpha angle >83degree) cam-type deformity resulted in adjusted OR of 3.67 (95% CI 1.68 to 8.01) and 9.66 (95% CI 4.72 to 19.78), respectively, for end-stage osteoarthritis. The combination of severe cam-type deformity and decreased internal rotation at baseline resulted in an even more pronounced adjusted OR, and in a positive predictive value of 52.6% for end-stage osteoarthritis. For incident osteoarthritis, only a moderate cam-type deformity was predictive OR=2.42 (95% CI 1.15 to 5.06). Conclusions: Individuals with both severe cam-type deformity and reduced internal rotation are strongly predisposed to fast progression to end-stage osteoarthritis. As cam impingement might be a modifiable risk factor, early recognition of this condition is important Notes: DB - Embase UI - 2013300592 IN - (Agricola, Heijboer, Bierma-Zeinstra, Verhaar, Weinans, Waarsing) Department of Orthopaedics, Erasmus MC University Medical Centre, Rotterdam, Netherlands (Bierma-Zeinstra) Department of General Practice, Erasmus MC University Medical Centre, Rotterdam, Netherlands (Weinans) Department of Biomechanical Engineering, Delft University of Technology, Delft, Netherlands CP - United Kingdom LG - English PT - Journal: Article EM - 201322 DD - 20130527

(8) Agricola R, Heijboer MP, Roze RH, Reijman M, Bierma-Zeinstra SM, Verhaar JA et al. Pincer deformity does not lead to osteoarthritis of the hip whereas acetabular dysplasia does: acetabular coverage and development of osteoarthritis in a nationwide prospective cohort study (CHECK). Osteoarthritis Cartilage 2013; 21(10):1514-1521. Ref ID: 603 Abstract: OBJECTIVE: Determining the relation between acetabular coverage, especially overcoverage which may lead to pincer impingement, and development of osteoarthritis (OA) of the hip. DESIGN: From a prospective cohort study of 1,002 individuals with symptoms of early OA (Cohort Hip and Cohort Knee, CHECK), 720 participants were included. Standardized anteroposterior pelvic radiographs and false profile lateral radiographs were obtained at baseline and 5 years follow-up. Acetabular undercoverage (mild dysplasia) and overcoverage (pincer deformity) were measured by a centre edge angle of <25 degrees and >40 degrees respectively in both radiographic views. The strength of association between those parameters at baseline and development of incident OA (Kellgren and Lawrence (K&L) grade >2 or total hip replacement), or joint space narrowing within 5 years was expressed in odds ratio (OR) adjusted for K&L grade, age, body mass index (BMI), and sex using generalized estimating equations. RESULTS: At baseline, 76% of the included hips had no signs of radiographic OA (K&L = 0) whereas 24% had doubtful OA (K&L = 1). Within 5 years, 7.0% developed incident OA. Acetabular dysplasia was significantly associated with development of incident OA with ORs between 2.62 (95% confidence interval (CI) 1.44-4.77) and 5.45 (95% CI 2.40-12.34), dependent on the radiographic view. A pincer deformity was not associated with any outcome measure, except for a significantly protective effect on incident OA when a pincer deformity was present in both radiographic views OR 0.34 (95% CI 0.13-0.87). CONCLUSION: Acetabular dysplasia was significantly associated with development of OA. However, a pincer deformity was not associated with OA, and might even have a protective effect on its development, which questions the supposed detrimental effect of pincer impingement Notes: DA - 20130920 IS - 1522-9653 (Electronic) IS - 1063-4584 (Linking) LA - eng PT - Journal Article PT - Multicenter Study PT - Research Support, Non-U.S. Gov't SB - IM

(9) Aguirre J, Del Moral A, Cobo I, Borgeat A, Blumenthal S. The role of continuous peripheral nerve blocks. Anesthesiology Research and Practice 2012 , 2012 Article Number: 560879 Date of Publication: 2012 2012. Ref ID: 366 Abstract: A continuous peripheral nerve block (cPNB) is provided in the hospital and ambulatory setting. The most common use of CPNBs is in the peri- and postoperative period but different indications have been described like the treatment of chronic pain such as cancer-induced pain, complex regional pain syndrome or phantom limb pain. The documented benefits strongly depend on the analgesia quality and include decreasing baseline/dynamic pain, reducing additional analgesic requirements, decrease of postoperative joint inflammation and inflammatory markers, sleep disturbances and opioid-related side effects, increase of patient satisfaction and ambulation/functioning improvement, an accelerated resumption of passive joint range-of-motion, reducing time until discharge readiness, decrease in blood loss/blood transfusions, potential reduction of the incidence of postsurgical chronic pain and reduction of costs. Evidence deriving from randomized controlled trials suggests that in some situations there are also prolonged benefits of regional anesthesia after catheter removal in addition to the immediate postoperative effects. Unfortunately, there are only few data demonstrating benefits after catheter removal and the evidence of medium- or long-term improvements in health-related quality of life measures is still lacking. This review will give an overview of the advantages and adverse effects of cPNBs. Copyright Â© 2012 Jose Aguirre et al Notes: DB - Embase UI - 2012400153 IN - (Aguirre, Borgeat) Division of Anesthesiology, Balgrist University Hospital, 8008 Zurich, Switzerland (Del Moral, Cobo) Department of Anesthesiology, General University Hospital of Valencia, 46014 Valencia, Spain (Blumenthal) Department of Anesthesiology, Triemli Hospital, 8063 Zurich, Switzerland CP - United States LG - English PT - Journal: Review EM - 201230 DD - 20120724

(10) Akiyama M, Nakashima Y, Kitano T, Nakamura T, Takamura K, Kohno Y et al. Remodelling of femoral head-neck junction in slipped capital femoral epiphysis: a multicentre study. Int Orthop 2013; 37(12):2331-2336. Ref ID: 598 Abstract: PURPOSE: We examined the remodelling of the femoral head-neck junction in patients with slipped capital femoral epiphysis (SCFE) and the frequency of residual cam deformities. METHODS: We reviewed 69 hips in 56 patients with stable SCFE who had undergone in situ pinning. Mean age at slip was 11.7 years and the follow-up period 63.4 months. Cam deformity was evaluated using the anterior offset alpha (alpha) angle and head-neck offset ratio (HNOR). RESULTS: The average alpha angle and HNOR significantly improved from 76.2 degrees to 51.3 degrees and 0.086 to 0.135, respectively; 25 hips (36.2%) still had an alpha angle greater than 50 degrees , and 32 hips (46.4%) had an HNOR of under 0.145. A multivariate analysis selected age at onset and slip angle as risk factors for cam deformity, with cutoff values 11.1 years and 21.0 degrees , respectively. CONCLUSIONS: Although most hips had remodelling of the head-neck junction, 29.4 % had residual cam deformities that may be susceptible to femoroacetabular impingement Notes: DA - 20140114 IS - 1432-5195 (Electronic) IS - 0341-2695 (Linking) LA - eng PT - Journal Article PT - Multicenter Study SB - IM

(11) Akkaya T, Unlu E, Alptekin A, Gumus HI, Umay E, Cakci A. Neurolytic phenol blockade of the obturator nerve for severe adductor spasticity. Acta Anaesthesiol Scand 2010; 54(1):79-85. Ref ID: 699 Abstract: BACKGROUND: In this study, we present the 3-month follow-up results of a retrospective analysis of obturator nerve (ON) phenol neurolysis performed between 2000 and 2007 in patients with adductor spasticity. METHODS: The study was performed by retrospective investigation of the clinical follow-up results of 80 ON phenol treatments in 62 patients. Neurolysis using 5-10 ml 6% phenol was applied with the guidance of fluoroscopy and a peripheral nerve stimulator. Pain, spasticity and hygiene were evaluated and the hip abduction range of motion (ROM) was measured at the end of the first week and in the first, second and third months following the intervention. RESULTS: The visual analogue scale scores decreased significantly in the first week, first month and the second month, but reached their initial values in the third month. A drastic increase in the ROM values was shown in hip abduction in the first week, first month and second month. An increase in the Ashworth Scale values was observed in the second and third months, but they did not reach their initial values. The hygiene score decreased drastically in the first week and the first and second months, but worsened in the third month. The success rate in nerve localization during ON neurolysis was 100%. CONCLUSION: ON phenol blockade with fluoroscopy and peripheral nerve stimulator guidance in patients with adductor spasticity led to a decrease in spasticity and pain with an increase in the ROM of the hip and better hygiene with an efficacy lasting for about 3 months Notes: DA - 20091207 IS - 1399-6576 (Electronic) IS - 0001-5172 (Linking) LA - eng PT - Journal Article RN - 0 (Sclerosing Solutions) RN - 339NCG44TV (Phenol) SB - IM

(12) Albers CE, Steppacher SD, Ganz R, Tannast M, Siebenrock KA. Impingement adversely affects 10-year survivorship after periacetabular osteotomy for DDH hip. Clinical Orthopaedics and Related Research 471 (5) ()(pp 1602-1614), 2013 Date of Publication: May 2013 2013;(5):1602-1614. Ref ID: 313 Abstract: Background: Although periacetabular osteotomy (PAO) for developmental dysplasia of the hip (DDH) provides conceptual advantages compared with other osteotomies and reportedly is associated with joint survivorship of 60% at 20 years, the beneficial effect of proper acetabular reorientation with concomitant arthrotomy and creation of femoral head-neck offset on 10-year hip survivorship remains unclear. Questions/purposes: We asked the following questions: (1) Does the 10-year survivorship of the hip after PAO improve with proper acetabular reorientation and a spherical femoral head; (2) does the Merle d'Aubigne-Postel score improve; (3) can the progression of osteoarthritis (OA) be slowed; and (4) what factors predict conversion to THA, progression of OA, or a Merle d'Aubigne-Postel score less than 15 points? Methods: We retrospectively reviewed 147 patients who underwent 165 PAOs for DDH with two matched groups: Group I (proper reorientation and spherical femoral head) and Group II (improper reorientation and aspherical femoral head). We compared the Kaplan-Meier survivorship, Merle d'Aubigne-Postel scores, and progression of OA in both groups. A Cox regression analysis (end points: THA, OA progression, or Merle d'Aubigne-Postel score less than 15) was performed to detect factors predicting failure. The minimum followup was 10 years (median, 11 years; range, 10-14 years). Results: An increased survivorship was found in Group I. The Merle d'Aubigne-Postel score did not differ. Progression of OA in Group I was slower than in Group II. Factors predicting failure included greater age, lower preoperative Merle d'Aubigne-Postel score, and the presence of a Trendelenburg sign, aspherical head, OA, subluxation, postoperative acetabular retroversion, excessive acetabular anteversion, and undercoverage. Conclusions: Proper acetabular reorientation and the creation of a spherical femoral head improve long-term survivorship and decelerate OA progression in patients with DDH. Level of Evidence: Level III, therapeutic study. See Guidelines for Authors for a complete description of levels of evidence. Â© 2013 The Association of Bone and Joint Surgeons Notes: DB - Embase UI - 2013258787 IN - (Albers, Steppacher, Tannast, Siebenrock) Department of Orthopedic Surgery, Inselspital, University of Bern, Freiburgstrasse, 3010 Bern, Switzerland (Ganz) Emeritus, Faculty of Medicine, University of Bern, Freiburgstrasse, 3010 Bern, Switzerland CP - United States LG - English PT - Journal: Article EM - 201320 DD - 20130510

(13) Albers CE, Steppacher S, Tannast M, Siebenrock K. Relative neck lengthening in complex proximal femoral deformities: Technique, complications, and 5-year results. Swiss Medical Weekly Conference: Annual Meeting of the Swiss Society of Orthopaedics and Traumatology 2014 St Gallen Switzerland Conference Start: 20140625 Conference End: 20140627 Conference Publication: (var pagings) 144 ()(pp 20S), 2014 Date of P 2014;(var.pagings):20S. Ref ID: 206 Abstract: Surgical hip dislocation and extended soft-tissue retinacular flap are techniques that allow a tailored treatment of complex proximal femoral deformities. Specifically, relative femoral neck lengthening (RFNL) is a new technique to address intra- and extraarticular femoroacetabular impingement. We evaluated clinical and radiographic outcome, complications, and conversion rate to total hip arthroplasty after RFNL with combined head-neck offset osteochondroplasty and advancement of the greater trochanter in hips with complex proximal femoral deformities. We retrospectively reviewed 42 patients (43 hips, mean age 23 years) that underwent RFNL. Underlying conditions included sequelae of Legg-Calve-Perthes disease (40 hips, 93%), slipped capital femoral epiphysis (2 hips, 5%), and septic hip arthritis (1 hip, 2%). We obtained abductor muscle strength, Merle d'Aubigne-Postel score, limp, range of motion, and anterior and posterior impingement test. Radiographic parameters included osteoarthritis (OA), alpha angle, sagging rope sign and trochanteric height. Complications were assessed using the Clavien Dindo classification modified by Sink et al. Mean follow-up was 7.8 (range, 5.1-11.1) years. Abductor muscle strength, Merle d'Aubigne-Postel score, range of motion (internal and external rotation, and abduction) improved. Limp and the anterior and posterior impingement test were less prevalent. The alpha angle improved. Trochanteric height was normalized. The center collum diaphyseal angle was unchanged. Progression to OA was not prevented. There were 7 complications (16%) requiring surgical intervention without long-term morbidity. Four hips (9%) converted to THA. RFNL allows correction of combined intra- and extraarticular impingement in hips with complex proximal femoral deformities. Specifically, clinical symptoms in this young patient population suffering daily pain and restricted joint function compromising daily life and physical activity improved after surgery. The rate of complications was low. The benefits of this procedure in delaying severe progression of OA still have to be shown Notes: DB - Embase UI - 71754958 IN - (Albers, Steppacher, Tannast, Siebenrock) Inselspital Bern, Switzerland LG - English PT - Journal: Conference Abstract EM - 201506 DD - 20150117

(14) Alosh H, Kamath AF, Baldwin KD, Keenan M, Lee GC. Outcomes of total hip arthroplasty in spastic patients. J Arthroplasty 2014; 29(8):1566-1570. Ref ID: 582 Abstract: Patients with spasticity and hip arthritis can present challenges to treatment. This investigation evaluated the effectiveness and safety of THA in patients with upper motor neuron disease. Twenty-seven consecutive patients with history of cerebral palsy (CP) or acquired spasticity (AS) underwent 30 THAs for treatment of hip arthritis. They were followed for an average 2.5 years (range 2.1-12.1). Patients with CP were more likely to require hip adductor release and hip flexor lengthening at the time of THA. Statistically significant improvements were made in Harris Hip Scores, pain scores, range of motion, ambulatory status, and the use ambulatory-assistive devices. There were no dislocations in this group. Patients with spasticity can benefit from THA in terms of pain relief and improved mobility with relatively low complications Notes: DA - 20140802 IS - 1532-8406 (Electronic) IS - 0883-5403 (Linking) LA - eng PT - Journal Article SB - IM

(15) Aly TA, Amin OA. Arthrodiatasis for the treatment of Perthes' disease. Orthopedics 2009; 32(11):817. Ref ID: 697 Abstract: It is hypothesized that the interruption of the blood supply is an important factor causing femoral head osteonecrosis in the early stages of Legg-Calve-Perthes disease. Currently, treatment by containment is recommended to direct and guide remodeling of the softened femoral head as it evolves from fragmentation through ossification. The goal of this study was to show the results of arthrodiatasis to induce height recovery of the femoral head and to achieve true ambulatory nonweight-bearing containment. Forty-two patients younger than 8 years with a diagnosis of Perthes' disease were studied. Twenty-three patients (9 class B and 14 class C according to Herring's classification) were treated with an articulated distraction technique and 19 patients (11 class B and 8 class C) were treated conservatively as a control group. Arthrodiatasis or articulated distraction of the hip combines off-loading of muscles and body forces with distraction of the joint space by means of an external fixator that crosses the hip joint. Radiologically, 21 patients (91%) had satisfactory results and 2 (9%) had unsatisfactory results. Clinically, the results were good in 21 patients (92%), fair in 1 (4%), and poor in 1 (4%). In patients treated conservatively, 14 patients (72%) had satisfactory results and 5 (28%) had unsatisfactory results. Clinically, 71% had good results, 17% had fair, and 12% had poor. We conclude that hip joint containment by articulated arthrodiatasis (plus adductors and psoas minimal tenotomy surgery) is an effective method in the management of Perthes' disease in patients younger than 8 years, classified B and C, and associated with a highly reduced range of abduction. Restoration of clinical abnormalities and satisfactory radiological parameters are achieved in high percentages Notes: DA - 20091111 IS - 1938-2367 (Electronic) IS - 0147-7447 (Linking) LA - eng PT - Clinical Trial PT - Journal Article SB - IM

(16) Amanatullah DF, Antkowiak T, Pillay K, Patel J, Refaat M, Toupadakis CA et al. Femoroacetabular impingement: Current concepts in diagnosis and treatment. Orthopedics 38 (3) ()(pp 185-199), 2015 Date of Publication: 01 Mar 2015 2015;(3):185-199. Ref ID: 191 Abstract: Femoroacetabular impingement (FAI) is a recently proposed concept describing abnormal anatomic relationships within the hip joint that may lead to articular damage. Impingement is caused by bony deformities or spatial malorientation of the femoral head-neck junction and/or the acetabulum. These abnormalities lead to pathologic contact and shearing forces at the acetabular labrum and cartilage during physiological hip motion. There is an increasing body of evidence that these forces lead to cartilage wear and eventual osteoarthritis. Treatment options for FAI are evolving rapidly. Although the gold standard remains open hip dislocation, arthroscopic techniques have shown significant promise. It is possible that early recognition and treatment of subtle deformity about the hip may reduce the rate of hip osteoarthritis in the future Notes: DB - Embase UI - 2015822650 IN - (Amanatullah, Antkowiak, Refaat) Department of Orthopaedic Surgery, University of California, Davis, Sacramento, CA, United States (Pillay, Jamali) Joint Preservation Institute, 2825 J St, Ste 440, Sacramento, CA 95816, United States (Patel) Orthopaedic Specialty Institute Medical Group of Orange County, Orange, CA, United States (Toupadakis) Department of Anatomy, Physiology, and Cell Biology, University of California, Davis, CA, United States CP - United States LG - English PT - Journal: Review EM - 201513 DD - 20150320

(17) Anderson LA, Kapron AL, Aoki SK, Peters CL. Coxa profunda: is the deep acetabulum overcovered? Clin Orthop Relat Res 2012; 470(12):3375-3382. Ref ID: 630 Abstract: BACKGROUND: Coxa profunda, or a deep acetabular socket, is often used to diagnose pincer femoroacetabular impingement (FAI). Radiographically, coxa profunda is the finding of an acetabular fossa medial to the ilioischial line. However, the relative position of the acetabular fossa to the pelvis may not be indicative of acetabular coverage. QUESTIONS/PURPOSES: We therefore determined the incidence of coxa profunda and evaluated associations between coxa profunda and other radiographic parameters of acetabular coverage commonly used to diagnose pincer FAI and acetabular dysplasia. METHODS: We evaluated the radiographs of three cohorts for coxa profunda, lateral center edge (LCE) angle, acetabular index, posterior wall sign, and crossover sign. Data from 67 collegiate football players were collected prospectively (Cohort 1). We identified two patient cohorts through retrospective review of all 179 hips undergoing hip preservation surgery from 2002 to 2008 (83 periacetabular osteotomies [Cohort 2] and 96 surgical dislocation and osteochondroplasties [Cohort 3]). RESULTS: In all three cohorts, we detected no difference in the LCE angle or acetabular index between hips with and without coxa profunda. Coxa profunda existed in hips representing the spectrum of acetabular coverage measured by LCE angle (-18 degrees to 60 degrees ) and acetabular orientation determined by the crossover sign. CONCLUSIONS: Coxa profunda was a common radiographic finding in both symptomatic patients and asymptomatic football players. Coxa profunda existed in hips representing the spectrum of acetabular coverage and was not associated with an overcovered acetabulum. We conclude coxa profunda is unrelated to overcoverage and suggest its use in diagnosis of pincer FAI be abandoned in favor of other determinants of focal or general overcoverage. LEVEL OF EVIDENCE: Level III, diagnostic study. See Instructions for Authors for a complete description of levels of evidence Notes: DA - 20121108 IS - 1528-1132 (Electronic) IS - 0009-921X (Linking) LA - eng PT - Journal Article PT - Research Support, N.I.H., Extramural PT - Research Support, Non-U.S. Gov't SB - AIM SB - IM

(18) Andjelkovic Z, Mladenovic D. Measuring the osteochondral connection of the femoral head and neck in patients with impingement femoroacetabular by determining the angle of 2alpha in lateral and anteroposterior hip radiographic images. Vojnosanitetski Pregled 70 (3) ()(pp 259-266), 2013 Date of Publication: March 2013 2013;(3):259-266. Ref ID: 319 Abstract: Background/Aim. Femoroacetabular impingement, a pathophysiological mechanism of small morphological changes of the hip leads to early arthritic changes. The aim of this study was to present a simple method for the quantification of femoral head and neck junction in patients with cam form of femoroacetabular impingement, in standardized anteroposterior and profile DUNN 90 radiograms of the hips. Methods. In standardized anteroposterior and profile DUNN 90 images of the hips we determined the angle of 2 alpha, defined by our own original method. We tested 141 hips in 81 patients without clinical signs of femoroacetabular impingement, and 153 hips in 76 patients with clinically clear signs of femoroacetabular impingement. Results. The value of the angle 2 alpha in anteroposterior hip radiograms was on average 113.7degree for the patients with clinical symptoms of impingement, and 84.2degree for the control group of patients (p < 0.0001), and in DUNN 90 profile radiography of the hip, the value of 2 alpha angle in the patients group was 97.2degree, and 74.6degree in the control group (p < 0.0001). The proposed method of determining the angle 2 alpha showed a high level sensitivity (97.8%) and specificity (98.7) and positive predictive value (98.6%). It was false positive in only 1.3%, and false negative in 2.12% of patients. Conclusion. Using standardized anteroposterior and profile radiographs of the hips, and without determination of femoral neck axis in patients with femoroacetabular impingement with the cam effect at the junction of the femoral head and neck, we proposed the method of measuring joint abnormalities of femoral head and neck junction, very capable to predict the disease development in an asymptomatic risk group of patients and high sensitive in the diagnosis of the disease in the group of patients Notes: DB - Embase UI - 2013144960 IN - (Andjelkovic) Department of Orthopedic Surgery and Traumatology, General Hospital Leskovac, Leskovac, Serbia (Mladenovic) Orthopedic Clinic, Clinical Center Nis, Nis, Serbia CP - Serbia OT - Merenje osteohondralnog spoja glave i vrata femura kod bolesnika sa femoroacetabularnim impingement-om odredivanjem ugla 2alpha na lateralnim i anteroposteriornim radiografskim snimcima kuka LG - English, Croatian PT - Journal: Article EM - 201312 DD - 20130318

(19) Andjelkovic Z, Mladenovic D, Vukasinovic Z, Arsic S, Mitkovic M, Micic I et al. Contribution to the method for determining femoral neck axis. Srp Arh Celok Lek 2014; 142(3-4):178-183. Ref ID: 578 Abstract: INTRODUCTION: Femoral neck axis plotting is of great significance in measuring parameters that define femoral head-neck junction sphericity in the group of patients with the femoroacetabular impingement. Literature methods of femoral neck axis determination have weaknesses associated with the risk of obtaining inaccurate values of certain parameters. OBJECTIVE: Method of plotting of the femoral neck axis by two parallel lines that belong to the medial quarter of the femoral neck is proposed. Method was tested on the anatomic specimens and the respec tive radiograms. METHODS: A total of 31 anatomic specimens of the proximal femur and respective radiographs were used, on which three axes of the femoral neck were plotted; accordingly, alpha angle value was determined and tested with corresponding parametric tests, with the measurement error of less than 5% and the strength of the applied tests of 80%. RESULTS: Alpha angle values obtained by plotting femoral neck axis using the literature and methods we have proposed were not significantly different in our series, and, in more than a half of the specimens, the two axes overlapped each other. CONCLUSION: The advantage of the proposed method does not depend on the position of the femoral head rotation center in relation to the femoral neck, which favors proposed method for measuring the angles of femoral head sphericity in patients with the femoral head translation. Disadvantage of the study is a small sample size for valid conclusions about the applicability of this method in clinical practice Notes: DA - 20140520 IS - 0370-8179 (Print) IS - 0370-8179 (Linking) LA - eng PT - Comparative Study PT - Journal Article PT - Research Support, Non-U.S. Gov't SB - IM

(20) Armfield DR, Kim DH, Towers JD, Bradley JP, Robertson DD. Sports-related muscle injury in the lower extremity. Clinics in Sports Medicine 2006; 25(4):803-842. Ref ID: 141 Abstract: Lower extremity muscle injuries are common in sprinting, running, jumping, and kicking activities. For competitive athletes these injuries may result in missed practice and competition. Some predisposing risk factors include asymmetric and decreased muscle strength, decreased flexibility, age, and level of competition. Many mild injuries are diagnosed clinically and treated with rest and rehabilitation. There is however a spectrum of overlap between the different clinical grades of muscle injury, and diagnostic imaging becomes a useful tool to confirm clinical suspicions and assess extent of injury, particularly for high-level athletes. This information may prognosticate convalescent time and influence the rehabilitation process. This article provides an overview of lower extremity muscle injuries and imaging techniques and appearances of common problems. Copyright Â© 2006 by Elsevier Inc Notes: ID - 106364250 IS - 4 CY - Philadelphia, Pennsylvania

(21) Armstrong K, Eickstaedt J, Reeves R. Care for the rehospitalized patient with chronic spinal cord injury. Hospital Medicine Clinics 3 (2) ()(pp e270-e292), 2014 Date of Publication: April 2014 2014;(2):e270-e292. Ref ID: 250 Abstract: A myriad of physiologic changes occur following spinal cord injury (SCI), and survivors of SCI are at risk for numerous complications. Considerable progress in SCI care has been achieved in the last 50years and life expectancy and causes of death after SCI are approaching those of the general population. As additional progress is made in restoring function after SCI, the impact of SCI is expected to continue to decrease over time. However, a partnership between the hospitalist and a SCI specialist optimizes the care of the rehospitalized patient with chronic SCI. Â© 2014 Elsevier Inc Notes: DB - Embase UI - 2014213844 IN - (Armstrong, Reeves) Department of Physical Medicine and Rehabilitation, Mayo Clinic, 200 First Street Southwest, Rochester, MN 55905, United States (Eickstaedt) Division of Hospital Medicine, Mayo Clinic, 200 First Street Southwest, Rochester, MN 55905, United States CP - United States LG - English PT - Journal: Review EM - 201415 DD - 20140408

(22) Arnason A, Sigurdsson SB, Gudmundsson A, Holme I, Engebretsen L, Bahr R. Risk factors for injuries in football. Am J Sports Med 2004; 32(1 Suppl):5S-16S. Ref ID: 765 Abstract: BACKGROUND: The injury risk in football is high, but little is known about causes of injury. PURPOSE: To identify risk factors for football injuries using a multivariate model. STUDY DESIGN: Prospective cohort study. METHODS: Participants were 306 male football players from the two highest divisions in Iceland. Before the 1999 football season started, the following factors were examined: height, weight, body composition, flexibility, leg extension power, jump height, peak O(2) uptake, joint stability, and history of previous injury. Injuries and player exposure were recorded throughout the competitive season. RESULTS: Older players were at higher risk of injury in general (odds ratio [OR] = 1.1 per year, P = 0.05). For hamstring strains, the significant risk factors were age (OR = 1.4 [1 year], P < 0.001) and previous hamstring strains (OR = 11.6, P <0.001). For groin strains, the predictor risk factors were previous groin strains (OR = 7.3, P = 0.001) and decreased range of motion in hip abduction (OR = 0.9 [1 degrees ], P = 0.05). Previous injury was also identified as a risk factor for knee (OR = 4.6) and ankle sprains (OR = 5.3). CONCLUSIONS: Age and previous injury were identified as the main risk factors for injury among elite football players from Iceland Notes: DA - 20040202 IS - 0363-5465 (Print) IS - 0363-5465 (Linking) LA - eng PT - Journal Article PT - Research Support, Non-U.S. Gov't SB - IM

(23) Arnold DR, Keene JS, Blankenbaker DG, Desmet AA. Hip pain referral patterns in patients with labral tears: analysis based on intra-articular anesthetic injections, hip arthroscopy, and a new pain "circle" diagram. Phys Sportsmed 2011; 39(1):29-35. Ref ID: 670 Abstract: BACKGROUND: Fluoroscopically guided intra-articular (FGIA) anesthetic hip joint injections have been used to determine whether the hip joint is the source of a patient's hip pain. However, there have been no reports documenting the efficacy of their use for defining the pain referral patterns (PRPs) of patients with labral tears. The aim of this study was to determine the PRPs of patients with labral tears and evaluate a new pain "circle" diagram (PCD) developed for this analysis. METHODS: Fifty-two patients were evaluated at our institution who had: 1) a preoperative FGIA anesthetic hip joint injection; 2) completed our PCD and a visual analog pain scale pre- and postinjection; 3) significant (>/= 80%) pain reduction after their FGIA injection; and 4) a labral tear and minimal (</= grade II) degenerative joint disease, as documented by hip arthroscopy. The PCD had circles in which patients put an "X" in to indicate pain in the following locations: anterior superior spine, lateral peritrochanteric area, central groin, symphysis pubis, proximal inner thigh, anterior thigh, posterior iliac crest, sacroiliac joint, sciatic notch, and ischial tuberosity. RESULTS: Based on the percentage of patients with significant (>/= 80%) pain reduction after administration of FGIA, 2 areas demonstrated substantially more and consistent presence of pain, which improved after injection. These were the central groin (P < 0.001) and the lateral peritrochanteric area (P = 0.02). CONCLUSION: The most common locations of pain were the central groin and the lateral peritrochanteric area. The least common were the ischial tuberosity and the anterior thigh, which are 2 areas often associated with osteoarthritis of the hip. The use of the PCD combined with an FGIA anesthetic injection may help physicians reconcile the expectations of those patients with labral tears who believe that hip arthroscopy will treat their multiple areas of "hip" pain Notes: DA - 20110307 IS - 0091-3847 (Print) IS - 0091-3847 (Linking) LA - eng PT - Comparative Study PT - Journal Article RN - 0 (Anesthetics) SB - IM

(24) Askling CM, Tengvar M, Saartok T, Thorstensson A. Acute first-time hamstring strains during slow-speed stretching: Clinical, magnetic resonance imaging, and recovery characteristics. American Journal of Sports Medicine 35 (10) ()(pp 1716-1724), 2007 Date of Publication: October 2007 2007;(10):1716-1724. Ref ID: 487 Abstract: Background: Hamstring strains can be of 2 types with different injury mechanisms, 1 occurring during high-speed running and the other during stretching exercises. Hypothesis: A stretching type of injury to the proximal rear thigh may involve specific muscle-tendon structures that could affect recovery time. Study Design: Case series (prognosis); Level of evidence, 2. Methods: Fifteen professional dancers with acute first-time hamstring strains were prospectively included in the study. All subjects were examined, clinically and with magnetic resonance imaging, on 4 occasions after injury: at day 2 to 4, 10, 21, and 42. The clinical follow-up period was 2 years. Results: All dancers were injured during slow hip-flexion movements with extended knee and experienced relatively mild acute symptoms. All injuries were located proximally in the posterior thigh close to the ischial tuberosity. The injury involved the semimembranosus (87%), quadratus femoris (87%), and adductor magnus (33%). All injuries to the semimembranosus involved its proximal free tendon. There were no significant correlations between clinical or magnetic resonance imaging parameters and the time to return to preinjury level (median, 50 weeks; range, 30-76 weeks). Conclusion: Stretching exercises can give rise to a specific type of strain injury to the posterior thigh. A precise history and careful palpation provide the clinician enough information to predict a prolonged time until return to preinjury level. One factor underlying prolonged recovery time could be the involvement of the free tendon of the semimembranosus muscle. Â© 2007 American Orthopaedic Society for Sports Medicine Notes: DB - Embase UI - 2007470891 IN - (Askling, Thorstensson) Swedish School of Sport and Health Sciences, Stockholm, Sweden (Askling, Saartok) Department of Molecular Medicine and Surgery, Stockholm Sports Trauma Research Center, Karolinska Institutet, Stockholm, Sweden (Tengvar) Department of Radiology, Sophiahemmet Hospital, Stockholm, Sweden (Askling) Box 5626, 114 86 Stockholm, Sweden CP - United States LG - English PT - Journal: Article EM - 200700 DD - 20071003

(25) Ast MP, John TK, Labbisiere A, Robador N, Valle AGD. Fractures of a single design of highly cross-linked polyethylene acetabular liners: An analysis of voluntary reports to the united states food and drug administration. Journal of Arthroplasty 29 (6) ()(pp 1231-1235), 2014 Date of Publication: June 2014 2014;(6):1231-1235. Ref ID: 242 Abstract: Polyethylene liner fracture is a risk associated with the use of highly cross-linked UHMWPE. We performed a review of the voluntary reports of fractured liners to the US Food and Drug Administration to determine if any risk factors could be identified. There have been 74 reports of fractured Trilogy, Longevity liners to the US Food and Drug Administration since 1999. Most cases utilized small acetabular shells (< 54. mm) combined with large diameter heads (> 36. mm). Liners less than 7. mm thick at the weight bearing or 4.8. mm thick at the rim should be used with caution. At revision surgery, malpositioned shells should be revised and the use of a thin liner should be avoided. Â© 2014 Elsevier Inc Notes: DB - Embase UI - 2014343179 IN - (Ast, John, Labbisiere, Robador, Valle) Department of Orthopaedic Surgery, Division of Adult Reconstruction and Joint Replacement Surgery, Hospital for Special Surgery, New York, NY, United States CP - United States LG - English PT - Journal: Article EM - 201423 DD - 20140604

(26) Astarita E, Bellotti V, Moya GE, Cardenas NC, Ribas FM. Short-term results of surgical treatment of adhesions capsular-labral and capsular-bone in the young adults hip. Journal of Orthopaedics and Traumatology Conference: 99th National Congress of the Italian Society of Orthopaedics and Traumatology Rome Italy Conference Start: 20141122 Conference End: 20141125 Conference Publication: (var pagings) 15 ()(pp S72), 201 2014;(var.pagings):S72. Ref ID: 225 Abstract: Introduction Femoro-acetabular impingement (FAI) has established in the last years as a cause of osteoarthritis in youth people. With the development of various techniques also complications are raised. The capsular-labral adhesions are one of the most frequent complications that can generate dolour, discomfort and decreased mobility in patients. Methods From July 2003 to December 2012 were treated 814 patients with diagnosis of FAI. Among these, 33 patients were diagnosed of capsular-labral adhesions. From these group, 20 were operated with arthroscopic technique and 13 with mini-open technique. On average, the second-look surgery has been realized at 7.3 months post-operatively. The results are evaluated with the clinical examination, range of motion, NASH and Dexeus Combined Score (DCS). Results The mean follow-up was 3.2 years (range 1-8 years). The value of NASH has gone from a 51.5 (R 29-61) to 83.2 points (R 6-93.1) at last follow-up. The DCS showed a satisfactory results in 84.8 % of patients (28). Capsular-labral adhesions has been found in 28 patients (84.8 %) and in particular in the area corresponding to the anchors and in the region of the head neck junction in all patients with CAM hypocorrection (30.3 %). Discussion Adhesions are a problem still not fully described in the literature. It seems that they can depend on several factors: endogenous, exogenous as well as an incorrect program of postoperative rehabilitation, hypocorrections, hypersensitivity to the suture material and autoimmune factors. The incidence may be higher than that reported in our study. Conclusions Diagnosis and early treatment of adhesions in the young adults' hip appears to be effective with satisfactory short-term results in the majority of patients Notes: DB - Embase UI - 71659969 IN - (Astarita, Bellotti, Moya Gomez, Cardenas Nylander, Ribas Fernandez) ICATME Institut Catala de Traumatologia i Medicina de l'Esport, Hospital Universitario Quiron Dexeus Barcelona, Barcellona, Spain LG - English PT - Journal: Conference Abstract EM - 201445 DD - 20141027

(27) Audenaert E, Vigneron L, Pattyn C. A method for three-dimensional evaluation and computer aided treatment of femoroacetabular impingement. Comput Aided Surg 2011; 16(3):143-148. Ref ID: 668 Abstract: Several theoretical models have shown that the range of motion of the hip joint is impaired in patients with femoroacetabular impingement, and that the acetabular cartilage is at risk of being damaged as a result of abnormal shear stresses, even during normal everyday activities. Computer aided technologies might add to the early diagnosis and adequate treatment of such lesions. This paper describes the technique, theories and algorithms we have developed for patient-specific detection, analysis and computer aided surgery of femoroacetabular impingement. Currently available models applicable to femoroacetabular impingement offer modeling based on collision analysis of a constrained hip joint. Such an approach implies that neither the femur nor the acetabulum can be analyzed completely separately for the presence of structural lesions responsible for the impingement problem. Moreover, a constrained model does not allow for comprehensive prediction of the possible locations and extent of secondary cartilage lesions (so-called contre-coup lesions) of the posterior acetabulum opposite the anterior impingement site. We report a new technique for the subject-specific morphological analysis of the proximal femur, acetabulum and hip joint. The technique offers a number of advantages compared to currently used techniques for the diagnosis and evaluation of hip impingement, and has direct orthopaedic applications as it allows computer aided planning and minimally invasive surgery for patients with femoroacetabular impingement Notes: DA - 20110411 IS - 1097-0150 (Electronic) IS - 1092-9088 (Linking) LA - eng PT - Journal Article PT - Research Support, Non-U.S. Gov't SB - IM

(28) Audenaert EA, Vigneron L, Van Hoof T, D'Herde K, van Maele G, Oosterlinck D et al. In vitro validation and reliability study of electromagnetic skin sensors for evaluation of end range of motion positions of the hip. Medical & biological engineering & computing 49 (12) ()(pp 1405-1412), 2011 Date of Publication: Dec 2011 2011;(12):1405-1412. Ref ID: 291 Abstract: There is growing evidence that femoroacetabular impingement (FAI) is a probable risk factor for the development of early osteoarthritis in the nondysplastic hip. As FAI arises with end range of motion activities, measurement errors related to skin movement might be higher than anticipated when using previously reported methods for kinematic evaluation of the hip. We performed an in vitro validation and reliability study of a noninvasive method to define pelvic and femur positions in end range of motion activities of the hip using an electromagnetic tracking device. Motion data, collected from sensors attached to the bone and skin of 11 cadaver hips, were simultaneously obtained and compared in a global reference frame. Motion data were then transposed in the hip joint local coordinate systems. Observer-related variability in locating the anatomical landmarks required to define the local coordinate system and variability of determining the hip joint center was evaluated. Angular root mean square (RMS) differences between the bony and skin sensors averaged 3.2degree (SD 3.5degree) and 1.8degree (SD 2.3degree) in the global reference frame for the femur and pelvic sensors, respectively. Angular RMS differences between the bony and skin sensors in the hip joint local coordinate systems ranged at end range of motion and dependent on the motion under investigation from 1.91 to 5.81degree. The presented protocol for evaluation of hip motion seems to be suited for the 3-D description of motion relevant to the experimental and clinical evaluation of femoroacetabular impingement Notes: DB - Embase UI - 21751065 IN - (Audenaert) Department of Orthopaedic Surgery and Traumatology, Ghent University Hospital, De Pintelaan 185, 9000 Ghent, Belgium CP - United States LG - English PT - Journal: Article EM - 201331 DD - 20120308

(29) Audenaert EA, Mahieu P, Pattyn C. Three-dimensional assessment of cam engagement in femoroacetabular impingement. Arthroscopy - Journal of Arthroscopic and Related Surgery 27 (2) ()(pp 167-171), 2011 Date of Publication: February 2011 2011;(2):167-171. Ref ID: 412 Abstract: Purpose: The purpose of our study was to 3-dimensionally assess cam engagement in male patients with symptomatic femoroacetabular impingement during motion. Methods: A total of 13 hips with cam-type impingement were investigated. Patient anatomy and clinical range of motion were determined. After 3-dimensional segmentation and reconstruction, the dynamic behavior of the cam lesion was investigated for the previously analyzed motions. Results: Important differences in the pattern of cam engagement were noticed. Abutment of the cam lesion and the acetabular cartilage was observed in flexion in 7 hips (54%) and in abduction in 11 hips (84%). Internal rotation with the hip in 90degree of flexion caused intrusion of the cam lesion into the joint in 10 of the investigated cases (77%). Neutral rotation did not cause any conflict between the cam lesion and acetabulum for the measured range of motion. A similar area in the anterosuperior quadrant of the acetabulum appeared to be involved in the different motions that were analyzed. Conclusions: Typically, during internal rotation in 90degree of flexion, the centromedial portion of the cam lesion was found to abut against the anterosuperior quadrant of the acetabular cartilage. During abduction and flexion, this appeared to be the lateral and medial portions of the cam lesion, respectively. All motions causing cam intrusion appeared to focus on the same cartilage area of the acetabulum in its anterosuperior quadrant. Level of Evidence Level II, diagnostic study. Â© 2011 Arthroscopy Association of North America Notes: DB - Embase UI - 2011054333 IN - (Audenaert, Mahieu, Pattyn) Department of Orthopaedic Surgery and Traumatology, Ghent University Hospital, De Pintelaan 185, 9000 Ghent, Belgium CP - United States LG - English PT - Journal: Article EM - 201100 DD - 20110214

(30) Audenaert EA, Vigneron L, Van Hoof T, D'Herde K, van Maele G, Oosterlinck D et al. In vitro validation and reliability study of electromagnetic skin sensors for evaluation of end range of motion positions of the hip. Med Biol Eng Comput 2011; 49(12):1405-1412. Ref ID: 662 Abstract: There is growing evidence that femoroacetabular impingement (FAI) is a probable risk factor for the development of early osteoarthritis in the nondysplastic hip. As FAI arises with end range of motion activities, measurement errors related to skin movement might be higher than anticipated when using previously reported methods for kinematic evaluation of the hip. We performed an in vitro validation and reliability study of a noninvasive method to define pelvic and femur positions in end range of motion activities of the hip using an electromagnetic tracking device. Motion data, collected from sensors attached to the bone and skin of 11 cadaver hips, were simultaneously obtained and compared in a global reference frame. Motion data were then transposed in the hip joint local coordinate systems. Observer-related variability in locating the anatomical landmarks required to define the local coordinate system and variability of determining the hip joint center was evaluated. Angular root mean square (RMS) differences between the bony and skin sensors averaged 3.2 degrees (SD 3.5 degrees ) and 1.8 degrees (SD 2.3 degrees ) in the global reference frame for the femur and pelvic sensors, respectively. Angular RMS differences between the bony and skin sensors in the hip joint local coordinate systems ranged at end range of motion and dependent on the motion under investigation from 1.91 to 5.81 degrees . The presented protocol for evaluation of hip motion seems to be suited for the 3-D description of motion relevant to the experimental and clinical evaluation of femoroacetabular impingement Notes: DA - 20111125 IS - 1741-0444 (Electronic) IS - 0140-0118 (Linking) LA - eng PT - Journal Article PT - Research Support, Non-U.S. Gov't PT - Validation Studies SB - IM

(31) Audenaert EA, Houcke JV, Maes B, Victor J, Pattyn C, Bosschel LV. Range of motion in femoroacetabular impingement. Acta Orthopaedica Belgica 78 (3) ()(pp 327-332), 2012 Date of Publication: 2012 2012;(3):327-332. Ref ID: 361 Abstract: Recent epidemiological studies have demonstrated that radiographic features specific to femoroacetabular impingement appear far more frequently in healthy and asymptomatic cohorts than previously anticipated. It remains unclear how incidental findings should be interpreted clinically. In addition, several authors have suggested that a decreased range of motion is part of the clinical presentation of femoroacetabular impingement. The purpose of the present study was to describe and analyze differences in range of motion between femoroacetabular impingement patients, asymptomatic individuals with incidental radiographic findings and healthy controls, using a validated electromagnetic tracking system. Furthermore, it was evaluated which motions were clinically relevant and could be used to differentiate between these three groups. We found all evaluated motions to differ significantly between patients and controls. The anterior impingement test showed a significant difference between patients and asymptomatic cases. In conclusion, functional evaluation of the range of motion appeared in this study as a useful tool in the diagnostic work-up of femoracetabular impingement. Â© 2012, Acta Orthopedica Belgica Notes: DB - Embase UI - 22822572 IN - (Audenaert, Houcke, Maes, Victor, Pattyn) Department of Orthopaedic Surgery and Traumatology, Ghent University Hospital, De Pintelaan 185, 9000 Ghent, Belgium (Bosschel) Department of Physical and Rehabilitation Medicine, Ghent University Hospital, Belgium CP - Belgium LG - English PT - Journal: Article EM - 201234 DD - 20120822

(32) Audenaert EA, Peeters I, Vigneron L, Baelde N, Pattyn C. Hip morphological characteristics and range of internal rotation in femoroacetabular impingement. Am J Sports Med 2012; 40(6):1329-1336. Ref ID: 644 Abstract: BACKGROUND: Radiographic features specifically related to the occurrence of femoroacetabular impingement (FAI) appear to be highly prevalent in the asymptomatic population. It remains unclear, however, how these incidental findings should be interpreted clinically and which other variables might differentiate between true incidental findings and preclinical patients. PURPOSE: To study the association between cam and overall hip morphological characteristics and range of motion in impingement patients, asymptomatic patients (healthy patients with radiographic features specific to FAI), and healthy controls. STUDY DESIGN: Cross-sectional study; Level of evidence, 3. METHODS: Morphological parameters describing cam and overall hip anatomy were obtained from 30 patients (10 per subgroup) with use of 3-dimensional computational methods. In addition, the range of internal rotation in high flexion activities was evaluated, and its relation to hip morphological variables was analyzed in a multivariate regression model. RESULTS: Size of the cam lesion and range of motion significantly differed between groups (P < .05). The range of internal rotation on impingement testing was found to average 27.9 degrees in the healthy control group compared with 21.1 degrees in the asymptomatic control group with radiographic features specific to FAI (P < .001) and 12.3 degrees in the patient group (P < .001). Cam size, acetabular coverage, and femoral version appeared to be predictive variables for the range of internal rotation. Seventy-five percent of variance between patients could be attributed to the combined effect of these 3 variables (R = .86). The range of motion was decreased in cam patients and asymptomatic patients, and early femoroacetabular conflict was not restricted to the area of the cam lesion but involved the entire anterior femoral head-neck junction. CONCLUSION: Decreased range of motion, as found in FAI, is not solely dependent on the size or even the occurrence of a cam lesion but should be interpreted by taking into account the overall hip anatomy, specifically femoral version and acetabular coverage. Decreased femoral anteversion and increased acetabular coverage add to the risk of early femoroacetabular collision during sports and activities of daily living and therefore appear to be additional predictive variables, besides the finding of a cam lesion, for the risk of clinical hip impingement development. In addition, the findings suggest that surgical osteochondroplasty to restore a normal range of motion may necessitate more excessive bone resection than what simply appears to be a bump on imaging Notes: DA - 20120604 IS - 1552-3365 (Electronic) IS - 0363-5465 (Linking) LA - eng PT - Journal Article PT - Research Support, Non-U.S. Gov't SB - IM

(33) Augereau B, Travers V, Le Balch T, Witvoet J. [Total hip and knee arthroplasties in hemophilia. Apropos of 27 cases]. Rev Chir Orthop Reparatrice Appar Mot 1987; 73(5):381-394. Ref ID: 793 Abstract: Thirteen total hip and 14 total knee prostheses were performed in 21 haemophilic patients. Nineteen had severe factor deficiency. Their average age was 43 years. Pain was the only indication for hip prostheses. All the hip arthropathies were of Arnold stage IV or V. For the knees, the indication was permanent pain with patello-femoral involvement in nine cases. In other cases, stiffness and instability was the indication. Seven knees, one out of two, had a flexion deformity of more than 30 degrees and only in four knees, one in three, was the range of flexion greater than 90 degrees. The quadriceps was extremely atrophied in eight knees and was always fibrotic. The arthropathies were of stage IV in three cases and stage V in eleven cases. There was pre-operative valgus deformity, greater than 20 degrees in three cases. At the hip, all 13 total prostheses were cemented. The 11 patients had factor replacement for an average of 21 days. No inhibitor was present pre-operatively or developed after operation. Early complications were rare: two moderate hematomata of the hip and one haematoma of the homolateral psoas. The late complications were not unusual: two aseptic bipolar loosenings after eight and nine years. At long-term follow-up, with a mean of four years and one month, 77 per cent of the hips were painless and stable with a good range of movement. Eight per cent were painless and stable but had some limitation of flexion. Fifteen per cent were failures. At the knee, a Guepar I knee was inserted in four cases, a Total Condylar knee in eight cases and a Kali knee in two cases. All the patients had factor replacement for 24 days. No post-operative inhibitor developed. The early complications were three superficial skin necroses, four deep hematomata and one transient common peroneal nerve palsy. The late complications were one permanent dislocation of the patella and one bipolar septic loosening with septic pyaemia which needed an arthrodesis and required 79,290 International Units of factor VIII, 72 units of packed cells and 28 bottles of fresh plasma. After a mean follow-up of two years and five months, five knee prostheses had a very good results, four a fair result and five a bad result Notes: DA - 19871112 IS - 0035-1040 (Print) IS - 0035-1040 (Linking) LA - fre PT - English Abstract PT - Journal Article RN - 0 (Immunoglobulins) RN - 0 (circulating anticoagulants) SB - IM

(34) Avrahami D, Potvin JR. The clinical and biomechanical effects of fascial-muscular lengthening therapy on tight hip flexor patients with and without low back pain. Journal of the Canadian Chiropractic Association 2014; 58(4):444-456. Ref ID: 68 Notes: IS - 4

(35) Ayeni O, Naudie D, Crouch S, Adili A, Pindiprolu B, Chien T et al. Surgical indications for treatment for femoroacetabular impingement with surgical hip dislocation. Knee Surgery, Sports Traumatology, Arthroscopy 2013; 21(7):1676-1684. Ref ID: 62 Notes: IS - 7

(36) Ayeni OR, Banga K, Bhandari M, Maizlin Z, de Sa D, Golev D et al. Femoroacetabular impingement in elite ice hockey players. Knee Surg Sports Traumatol Arthrosc 2014; 22(4):920-925. Ref ID: 604 Abstract: PURPOSE: The purpose of this study is to evaluate the presence of clinical and radiological femoroacetabular impingement (FAI) in elite ice hockey players and compare it to a control group of non-athletes. METHODS: Forty participants (20 non-athletes and 20 elite ice hockey athletes) underwent an evaluation of their hip joint, including assessment of range of motion and special provocative impingement tests. Two musculoskeletal radiologists assessed MRIs completed on each participant for radiological findings associated with FAI, including alpha angle, acetabular version angle, acetabular depth, and/or a lateral centre edge angle, and findings of labral and cartilage degeneration. A comparative analysis of the clinical and radiological findings was subsequently completed. RESULTS: There was a significant difference in the radiological CAM impingement measured by mean alpha angle between both groups (non-athletes: 43.2 degrees, SD 9.7; and athletes: 54.2 degrees, SD 12 (p = 0.003)). There were no statistically significant differences between the groups upon evaluating PINCER impingement. There were no statistically significant differences in clinical examination findings between both groups. CONCLUSION: MRI evidence suggests that CAM impingement is more common in the elite ice hockey athlete in comparison with non-athletes. However, as this is a pilot study examining findings in asymptomatic individuals, there is a need for a longitudinal prospective cohort study. In keeping with this, sufficient, long-term follow-up is required to assess at what point, if any, these subjects with radiological findings become symptomatic Notes: DA - 20140318 IS - 1433-7347 (Electronic) IS - 0942-2056 (Linking) LA - eng PT - Journal Article SB - IM

(37) Bach DK, Green DS, Jensen GM, Savinar E. A comparison of muscular tightness in runners and nonrunners and the relation of muscular tightness to low back pain in runners. Journal of Orthopaedic and Sports Physical Therapy 6 (6) ()(pp 315-323), 1985 Date of Publication: 1985 1985;(6):315-323. Ref ID: 534 Abstract: The focus of this experimental study was to compare muscular tightness at the hip between runners and nonrunners, and to determine if there is a relation between muscular tightness and low back pain in runners. Goniometric range of motion measurements of three hip movements, abduction, flexion with the knee extended, and extension, were taken on two subject populations, runners (N = 45), and nonrunners (n = 43), in order to determine tightness of the hip adductor, extensor, and flexor muscles, respectively. The mean score values obtained for each of the three measurements of both the right and left sides were compared for differences between the running and nonrunning populations and between male and female subjects. Runners were found to be significantly limited in the movement of hip flexion with the knee extended. The mean score values obtained for all male subjects for this movement were lower than those for all female subjects. The incidence of low back pain in runners was examined; however, no correlation could be drawn between muscular tightness in these subjects and low back pain Notes: DB - Embase UI - 1985169477 IN - (Bach, Green, Jensen, Savinar) Division of Physical Therapy, Stanford University, Palo Alto, CA 94305 United States CP - United States LG - English PT - Journal EM - 198500 DD - 19850911

(38) Bali K, Railton P, Kiefer GN, Powell JN. Subcapital osteotomy of the femoral neck for patients with healed slipped capital femoral epiphysis. Bone Joint J 2014; 96-B(11):1441-1448. Ref ID: 554 Abstract: We report the clinical and radiological outcome of subcapital osteotomy of the femoral neck in the management of symptomatic femoroacetabular impingement (FAI) resulting from a healed slipped capital femoral epiphysis (SCFE). We believe this is only the second such study in the literature. We studied eight patients (eight hips) with symptomatic FAI after a moderate to severe healed SCFE. There were six male and two female patients, with a mean age of 17.8 years (13 to 29). All patients underwent a subcapital intracapsular osteotomy of the femoral neck after surgical hip dislocation and creation of an extended retinacular soft-tissue flap. The mean follow-up was 41 months (20 to 84). Clinical assessment included measurement of range of movement, Harris Hip Score (HHS) and Western Ontario and McMaster Universities Osteoarthritis score (WOMAC). Radiological assessment included pre- and post-operative calculation of the anterior slip angle (ASA) and lateral slip angle (LSA), the anterior offset angle (AOA) and centre head-trochanteric distance (CTD). The mean HHS at final follow-up was 92.5 (85 to 100), and the mean WOMAC scores for pain, stiffness and function were 1.3 (0 to 4), 1.4 (0 to 6) and 3.6 (0 to 19) respectively. There was a statistically significant improvement in all the radiological measurements post-operatively. The mean ASA improved from 36.6 degrees (29 degrees to 44 degrees ) to 10.3 degrees (5 degrees to 17 degrees ) (p < 0.01). The mean LSA improved from 36.6 degrees (31 degrees to 43 degrees ) to 15.4 degrees (8 degrees to 21 degrees ) (p < 0.01). The mean AOA decreased from 64.4 degrees (50 degrees to 78 degrees ) 32.0 degrees (25 degrees to 39 degrees ) post-operatively (p < 0.01). The mean CTD improved from -8.2 mm (-13.8 to +3.1) to +2.8 mm (-7.6 to +11.0) (p < 0.01). Two patients underwent further surgery for nonunion. No patient suffered avascular necrosis of the femoral head. Subcapital osteotomy for patients with a healed SCFE is more challenging than subcapital re-orientation in those with an acute or sub-acute SCFE and an open physis. An effective correction of the deformity, however, can be achieved with relief of symptoms related to impingement Notes: DA - 20141105 IS - 2049-4408 (Electronic) LA - eng PT - Journal Article SB - AIM SB - IM

(39) Ball ST, Schmalzried TP. Posterior femoroacetabular impingement (PFAI) - after hip resurfacing arthroplasty. Bull NYU Hosp Jt Dis 2009; 67(2):173-176. Ref ID: 705 Abstract: INTRODUCTION: The recent, encouraging outcome literature on hip resurfacing arthroplasty (HRA) has not sufficiently examined the potential occurrence of postoperative femoroacetabular impingement (PFAI) and sequelae. The current study asks the questions, "Does femoroacetabular impingement occur after hip resurfacing arthroplasty (HRA) and, if so, what are the clinical outcomes?" METHODS: Sixty-nine consecutive hips in 57 patients with a minimum of 2 years clinical and radiographic follow-up were evaluated. Both acetabular and femoral component positions and postsurgical changes in the femoral neck and acetabulum were recorded. RESULTS: Fourteen hips in 13 patients (20%) developed a small scalloped, corticated erosion in the posterior neck, just distal to the femoral component and adjacent to the acetabular component rim. These erosions were between 5 and 10 mm in depth and became apparent at an average of 15 months (range, 6 to 24 months) following surgery. After 2 years, they showed no further progression. The location and shape of the erosions indicate PFAI as the etiology. One hip also demonstrated similar changes in the anterior neck. The Harris Hip Score and UCLA (University of California at Los Angeles) Activity Scores were higher in patients with such erosions (97.5 and 9.2, respectively), compared to those patients without (93.5 and 8.4, respectively). Additionally, patients with erosions reported slightly better pain relief on average than patients with no radiographic evidence of impingement. No significant differences in range of motion or component position were found between the two groups. CONCLUSIONS: Small, corticated, non-progressive erosions can occur from femoroacetabular impingement following HRA. The erosions were more commonly posterior in this series, and they tended to occur in active patients. There is no adverse effect on clinical outcomes, and more specifically, there is no association of PFAI with pain Notes: DA - 20090708 IS - 1936-9719 (Print) IS - 1936-9719 (Linking) LA - eng PT - Journal Article PT - Research Support, Non-U.S. Gov't SB - IM

(40) Banerjee P, McLean CR. Femoroacetabular impingement: A review of diagnosis and management. Current Reviews in Musculoskeletal Medicine 4 (1) ()(pp 23-32), 2011 Date of Publication: March 2011 2011;(1):23-32. Ref ID: 398 Abstract: Hip pain in adults has traditionally been associated with osteoarthritis in the joint. However, many young patients with hip pain do get referred to orthopaedic surgeons without arthritis. Subtle bony and soft tissues abnormalities can present with hip pain in the active young adult. These abnormalities can lead to premature arthritis. With the improvements in clinical examination for hip impingement, radiological imaging using magnetic resonance arthrography (MRA) and or computed tomograms (CT) Scans, these lesions are being detected early. Though the cause of primary osteoarthritis is unknown, it is suggested that femoro-acetabular impingement (FAI) may be responsible for the progression of the disease in these patients. FAI is a pathological condition leading to abutment between the proximal femur and the acetabular rim. Two different mechanisms are described, although a combination of both is seen in clinical practice. Cam impingement is a result of reduced anterior femoral head neck offset. Pincer lesion is caused by abnormalities on the acetabular side. FAI due to either mechanism can lead to chondral lesions and labral pathology. Patients present with groin pain and investigated with radiographs, CT and MRA. Surgery is the treatment of choice. Open or arthroscopic exploration of the hip is undertaken with bony resection to improve the femoral head neck junction with resection or repair of the damaged labrum. This may involve femoral osteochondroplasty for the cam lesion and acetabular rim resection for pincer lesion. There is no difference in outcome between open and arthroscopic surgery for FAI. Â© 2011 Springer Science+Business Media, LLC Notes: DB - Embase UI - 2011284680 IN - (Banerjee, McLean) South West London Elective Orthopaedic Centre, Research and Education Unit, Epsom General Hospital, Dorking Road, London, Surrey KT18 7EG, United Kingdom CP - United States LG - English PT - Journal: Article EM - 201100 DD - 20110628

(41) Bartelt RB, Yuan BJ, Trousdale RT, Sierra RJ. The prevalence of groin pain after metal-on-metal total hip arthroplasty and total hip resurfacing. Clinical Orthopaedics and Related Research 468 (9) ()(pp 2346-2356), 2010 Date of Publication: September 2010 2010;(9):2346-2356. Ref ID: 426 Abstract: Background: Groin pain after total hip arthroplasty (THA) or total hip resurfacing arthroplasty can be troubling for patients and surgeons. Potential sources of pain include infection, loosening, metal hypersensitivity, or impingement of bony structures or the iliopsoas tendon. Questions/purposes: We compared the rate of groin pain after THA or hip resurfacing using metal-on-metal to those of other bearing surfaces. Methods: We identified 347 (334 patients) primary total hip (n = 301) or resurfacing (n = 46) arthroplasties. Complete preoperative, operative, and postoperative data were available for 282 hips. We retrospectively reviewed the charts for the presence or absence of groin pain at a minimum of 1 year after surgery with a specific focus on etiologic factors. The minimum followup was 12 months (mean, 14 months; range 12 to 24 months). Results: The rate of groin pain was 7% (15 of 217 patients) after THA with conventional bearing surfaces, 15% (4 of 26 patients) with metal-on-metal THA and 18% (7 of 39 patients) with total hip resurfacing. Younger patients were more likely to report groin pain postoperatively and more likely to have metal-on-metal bearing surfaces. Conclusions: Our data at short-term followup suggest increased rates of groin pain after metal-on-metal THA or resurfacing arthroplasty versus THA using polyethylene or ceramic bearing surfaces. The reasons are not clear but they appear to be associated with younger age. Potential factors include impingement, activity level and possibly higher expectations for patients receiving metal-on-metal bearing surfaces that may make those patients more likely to report postoperative pain. Level of Evidence: Level IV, therapeutic study. See Guidelines for Authors for a complete description of levels of evidence. Â© 2010 The Association of Bone and Joint Surgeons Notes: DB - Embase UI - 2010439478 IN - (Bartelt, Yuan, Trousdale, Sierra) Mayo Clinic, 200 First Street SW, Rochester, MN 55905, United States CP - United States LG - English PT - Journal: Conference Paper EM - 201000 DD - 20100901

(42) Batra YK, Rajeev S, Panda NB, Lokesh VC, Rao KLN. Intrathecal neostigmine with bupivacaine for infants undergoing lower abdominal and urogenital procedures: Dose response. Acta Anaesthesiologica Scandinavica 53 (4) ()(pp 470-475), 2009 Date of Publication: April 2009 2009;(4):470-475. Ref ID: 466 Abstract: Background: Intrathecal (IT) neostigmine produces dose-dependent analgesia in adults. However, the dose of spinal neostigmine has not been investigated in infants. The purpose of this study was to assess spinal anesthesia (SA) duration provided by four doses of spinal neostigmine added to bupivacaine for lower abdominal and urogenital procedures in infants. Methods: Seventy-five infants were randomized into five groups. The control group B received IT plain 0.5% hyperbaric bupivacaine. Groups BN.25, BN.50, BN.75, and BN1.0 received bupivacaine with 0.25, 0.5, 0.75, and 1 mug/kg of neostigmine, respectively. The primary variable was the duration of anesthesia assessed by recovery of hip flexion. Postoperative pain with facial expression, leg activity, arm activity, crying and consolability scale score,and rescue analgesic requirements were the secondary variables measured, and the side effects were noted. Results: Seventy-three infants completed the study. There was a significant linear increase in SA duration with IT neostigmine to 65.2 (4.3) min with 0.5 mug/kg (P<0.01), 88.2 (5.1) with 0.75 mug/kg (P<0.001) and 92 (4.3) with 1 mug/kg (P<0.001) from 52.4 (4.3) min with bupivacaine alone. SA duration showed no significant difference between plain bupivacaine and BN.25 (P=0.100) or between groups BN.75 and BN1.0 (P=0.451). Groups BN.75 and BN1.0 had significantly reduced pain scores, and the median duration before the first dose rescue analgesic was requested prolonged significantly (P<0.001) compared with the other three groups. Conclusions: IT neostigmine at a dose of 0.75 mug/kg added to bupivacaine significantly prolonged SA duration with reduced postoperative pain scores and rescue analgesic requirements in infants undergoing lower abdominal and urogenital procedures. No additional benefits were provided on increasing it to 1 mug/kg. Â© 2009 The Authors. Journal compilation Â© 2009 The Acta Anaesthesiologica Scandinavica Foundation Notes: DB - Embase UI - 2009148316 IN - (Batra) Department of Anaesthesia and Intensive Care, Post-graduate Institute of Medical Education and Research, Chandigarh-160012 (Batra, Rajeev, Panda, Lokesh) Department of Anaesthesia and Intensive Care, Postgraduate Institute of Medical Education and Research, Chandigarh-160012, India (Rao) Department of Pediatric Surgery, Postgraduate Institute of Medical Education and Research, Chandigarh-160012, India CP - Denmark LG - English PT - Journal: Article EM - 200900 DD - 20091110

(43) Beall DP, Sweet CF, Martin HD, Lastine CL, Grayson DE, Ly JQ et al. Imaging findings of femoroacetabular impingement syndrome. Skeletal Radiol 2005; 34(11):691-701. Ref ID: 749 Abstract: Femoroacetabular impingement syndrome (FAI) is a pathologic entity which can lead to chronic symptoms of pain, reduced range of motion in flexion and internal rotation, and has been shown to correlate with degenerative arthritis of the hip. History, physical examination, and supportive radiographic findings such as evidence of articular cartilage damage, acetabular labral tearing, and early-onset degenerative changes can help physicians diagnose this entity. Several pathologic changes of the femur and acetabulum are known to predispose patients to develop FAI and recognition of these findings can ultimately lead to therapeutic interventions. The two basic mechanisms of impingement-cam impingement and pincer impingement-are based on the type of anatomic anomaly contributing to the impingement process. These changes can be found on conventional radiography, MR imaging, and CT examinations. However, the radiographic findings of this entity are not widely discussed and recognized by physicians. In this paper, we will introduce these risk factors, the proposed supportive imaging criteria, and the ultimate interventions that can help alleviate patients' symptoms Notes: DA - 20051017 IS - 0364-2348 (Print) IS - 0364-2348 (Linking) LA - eng PT - Journal Article PT - Review SB - IM

(44) Beaule PE, Harvey N, Zaragoza E, Le Duff MJ, Dorey FJ. The femoral head/neck offset and hip resurfacing. J Bone Joint Surg Br 2007; 89(1):9-15. Ref ID: 741 Abstract: Because the femoral head/neck junction is preserved in hip resurfacing, patients may be at greater risk of impingement, leading to abnormal wear patterns and pain. We assessed femoral head/neck offset in 63 hips undergoing metal-on-metal hip resurfacing and in 56 hips presenting with non-arthritic pain secondary to femoroacetabular impingement. Most hips undergoing resurfacing (57%; 36) had an offset ratio <or= 0.15 pre-operatively and required greater correction of offset at operation than the rest of the group. In the non-arthritic hips the mean offset ratio was 0.137 (0.04 to 0.23), with the offset ratio correlating negatively to an increasing alpha angle. An offset ratio <or= 0.15 had a 9.5-fold increased relative risk of having an alpha angle >or= 50.5 degrees. Most hips undergoing resurfacing have an abnormal femoral head/neck offset, which is best assessed in the sagittal plane Notes: DA - 20070129 IS - 0301-620X (Print) IS - 0301-620X (Linking) LA - eng PT - Journal Article SB - AIM SB - IM

(45) Beaulieu ML, Oh YK, Bedi A, Ashton-Miller JA, Wojtys EM. Does limited internal femoral rotation increase peak anterior cruciate ligament strain during a simulated pivot landing? Am J Sports Med 2014; 42(12):2955-2963. Ref ID: 560 Abstract: BACKGROUND: Many factors contributing to anterior cruciate ligament (ACL) injury risk have been investigated. Recently, some ACL-injured individuals have presented with a decreased range of hip internal rotation compared with controls. The pathomechanics of why decreased hip range of motion increases risk of ACL injury have not yet been studied. HYPOTHESIS: Peak relative strain of the anteromedial bundle of the ACL (AM-ACL) during a simulated single-leg pivot landing is inversely related to the available range of internal femoral rotation. STUDY DESIGN: Controlled laboratory study. METHODS: A series of pivot landings were simulated in 10 female and 10 male human knee specimens with a testing apparatus that applied a 2-bodyweight impulsive load, inducing knee compression, flexion moment, and internal tibial torque. The range of internal femoral rotation was (1) locked at ~0 degrees , (2) limited with a hard stop to ~7 degrees , (3) limited with a hard stop to ~11 degrees , or (4) free, with rotation resisted by 2 springs to simulate the resistance of the active hip rotator muscles to stretch. The AM-ACL strain was quantified with a differential variable reluctance transducer. A linear mixed model was used to determine whether a significant linear relation existed between peak AM-ACL relative strain and range of internal femoral rotation. RESULTS: Peak AM-ACL relative strain was inversely related to the available range of internal femoral rotation (R (2) = 0.91; P < .001), with strain increasing 1.3% for every 10 degrees decrease in rotation; this represented a 20% increase in peak relative strain, given an average range of femoral rotation of 15 degrees upon landing in healthy athletes. CONCLUSION: Peak AM-ACL relative strain was inversely proportional to the available range of internal femoral rotation during simulated single-leg pivot landings. CLINICAL RELEVANCE: Decreased range of internal femoral rotation results in greater ACL strain and may therefore increase the susceptibility to ACL rupture with athletic cutting and pivoting activities. Screening for a limited range of hip internal rotation should therefore become a component of not only ACL injury prevention programs but also evaluation protocols for those with ACL injuries and/or reconstructions Notes: DA - 20141127 IS - 1552-3365 (Electronic) IS - 0363-5465 (Linking) LA - eng PT - Journal Article PT - Research Support, N.I.H., Extramural PT - Research Support, Non-U.S. Gov't SB - IM

(46) Beck M. Groin pain after open FAI surgery: the role of intraarticular adhesions. Clin Orthop Relat Res 2009; 467(3):769-774. Ref ID: 719 Abstract: Femoroacetabular impingement (FAI) is an established cause of osteoarthrosis of the hip. Surgery is intended to remove the cause of impingement with hip dislocation and resection of osseous prominences of the acetabular rim and of the femoral head-neck junction. Using the Merle d'Aubigne score and qualitative categories, recent studies suggest good to excellent outcomes in 75% to 80% of patients after open surgery with dislocation of the femoral head. Unsatisfactory outcome is mainly related to pain, located either in the area of the greater trochanter or in the groin. There are several reasons for persisting groin pain. Joint degeneration with joint space narrowing and/or osteophyte formation, insufficient correction of the acetabula, and femoral pathology are known factors for unsatisfactory outcome. Recently, intraarticular adhesions between the femoral neck and joint capsule have been identified as an additional cause of postoperative groin pain. The adhesions form between the joint capsule and the resected area on the femoral neck and may lead to soft tissue impingement. MR-arthrography is used for diagnosis and the adhesions can be treated successfully by arthroscopy. While arthroscopic resection improves outcome it is technically demanding. Avoiding the formation of adhesions is important and is perhaps best accomplished by passive motion exercises after the initial surgery Notes: DA - 20090204 IS - 1528-1132 (Electronic) IS - 0009-921X (Linking) LA - eng PT - Journal Article PT - Review SB - AIM SB - IM

(47) Beckett M, Hannon M, Ropiak C, Gerona C, Mohr K, Limpisvasti O. Clinical Assessment of Scapula and Hip Joint Function in Preadolescent and Adolescent Baseball Players. American Journal of Sports Medicine 2014; 42(10):2502-2510. Ref ID: 15 Notes: IS - 10

(48) Bedi A, Dolan M, Leunig M, Kelly BT. Static and dynamic mechanical causes of hip pain. Arthroscopy - Journal of Arthroscopic and Related Surgery 27 (2) ()(pp 235-251), 2011 Date of Publication: February 2011 2011;(2):235-251. Ref ID: 411 Abstract: Mechanical hip pain typically has been associated either with dynamic factors resulting in abnormal stress and contact between the femoral head and acetabular rim when the hip is in motion or with static overload stresses related to insufficient congruency between the head and acetabular socket in the axially loaded (standing) position. Compensatory motion may adversely affect the dynamic muscle forces in the pelvic region, leading to further strain and pain. Hip pain related to static overload stresses may also be localized to the anteromedial groin, but compensatory dysfunction of the periarticular musculature may lead to muscular fatigue and associated pain throughout the hip. As our understanding of hip joint mechanics has advanced, it has become increasingly apparent that hip pain in the absence of osteoarthritis may be due to a complex combination of mechanical stresses, both dynamic and static. With an emphasis on findings in the recent literature, this review will describe the dynamic and static factors associated with mechanical hip pain, the combinations of dynamic and static stresses that are commonly identified in hip pain, and common patterns of compensatory injury in patients with femoroacetabular impingement. Â© 2011 Arthroscopy Association of North America Notes: DB - Embase UI - 2011054341 IN - (Bedi) MedSport, Sports Medicine and Shoulder Surgery, University of Michigan, 24 Frank Lloyd Wright Dr, Lobby A, Ann Arbor, MI 48106, United States (Bedi, Dolan, Kelly) Hospital for Special Surgery, New York, NY, United States (Leunig) Department of Orthopaedic Surgery, University of Bern, Bern, Switzerland (Leunig) Hip Service, Schulthess Clinic, Zurich, Switzerland CP - United States LG - English PT - Journal: Article EM - 201100 DD - 20110214

(49) Bedi A, Zaltz I, De La TK, Kelly BT. Radiographic comparison of surgical hip dislocation and hip arthroscopy for treatment of cam deformity in femoroacetabular impingement. Am J Sports Med 2011; 39 Suppl:20S-28S. Ref ID: 664 Abstract: BACKGROUND: Whether open or arthroscopic techniques are employed, the goal of femoroacetabular impingement (FAI) surgery is to achieve impingement-free range of motion. While arthroscopic approaches have improved and gained popularity, an objective evaluation of the surgical correction achieved with this approach compared with open surgery remains to be defined in the literature. PURPOSE: This study was undertaken to compare the efficacy of arthroscopic osteoplasty and open surgical dislocation in treating FAI dysmorphology in a consecutive series of patients. STUDY DESIGN: Cohort study; Level of evidence, 3. METHODS: Surgical treatment was performed in 60 male patients under 40 years of age for symptomatic FAI refractory to nonoperative management. Patients were matched (not randomized) to treatment groups: 30 patients (15 left and 15 right hips) underwent arthroscopic cam and/or rim osteoplasty with labral debridement and/or refixation by an arthroscopic surgeon; and 30 (14 left and 16 right hips) underwent open surgical dislocation, cam and/or rim osteoplasty, and labral debridement or refixation by a hip preservation surgeon. Anteroposterior (AP) pelvis and extended-neck (Dunn) lateral radiographs were obtained and the depth of resection and arc of resection were measured by assessment of anterior femoral head-neck offset, AP and lateral alpha angle, and beta angle on preoperative and postoperative radiographs. RESULTS: In the arthroscopic group, the extended-neck lateral alpha angle was reduced by a mean of 17.2 degrees (28.3%, P < .05), AP alpha angle was reduced by a mean of 12.6 degrees (16.8%), anterior head-neck offset improved 5.0 mm (111%, P < .05), and beta angle increased by a mean of 23.1 degrees . In the open dislocation group, the extended-neck lateral alpha angle was reduced by a mean of 21.2 degrees (30.7%, P < .05), AP alpha angle was reduced by a mean of 20.1 degrees (25.7%), anterior head-neck offset improved 6.56 mm (108%, P < .05), and beta angle increased by a mean of 18.35 degrees . CONCLUSION: Arthroscopic osteoplasty can restore head-neck offset and achieve similar depth, arc, and proximal-distal resection with comparable efficacy to open surgical dislocation for anterior and anterosuperior cam and focal rim impingement deformity. The open technique, however, may allow greater correction of posterosuperior loss of femoral offset and may be favorable for FAI patterns that demonstrate considerable proximal femoral deformity on AP radiographs Notes: DA - 20110628 IS - 1552-3365 (Electronic) IS - 0363-5465 (Linking) LA - eng PT - Journal Article SB - IM

(50) Bedi A, Dolan M, Magennis E, Lipman J, Buly R, Kelly BT. Computer-assisted modeling of osseous impingement and resection in femoroacetabular impingement. Arthroscopy - Journal of Arthroscopic and Related Surgery 28 (2) ()(pp 204-210), 2012 Date of Publication: February 2012 2012;(2):204-210. Ref ID: 381 Abstract: Purpose: The purpose of this study was to evaluate the utility of computer-assisted 3-dimensional modeling in diagnosing and treating symptomatic hip impingement. Methods: Eight patients with symptomatic, focal cam and/or pincer impingement lesions underwent high-resolution computed tomography scans and computer-assisted, 3-dimensional modeling of the involved hip. Cam location, alpha angle, neck-shaft angle, femoral version, and acetabular version at the 12-o'clock through 3-o'clock positions were measured. The model was subsequently dynamized to define the preoperative range of motion and location of impingement with hip flexion, internal rotation, and internal rotation at 90degree of hip flexion. Virtual cam and pincer osteoplasty was performed to establish normal head-neck offset and head sphericity and to eliminate focal rim impingement lesions. Range of motion and location of impingement were reassessed after resection in the defined area of impingement. Results: The cam lesion was located between the 12-o'clock and 4-o'clock positions in all cases. The mean alpha angle was 66.4degree (range, 53degree to 80degree). Mean femoral version was 14.6degree (range, 5degree to 23degree). Mean preoperative hip flexion was 109.7degree (range, 87.5degree to 125.5degree), and mean internal rotation at 90degree of hip flexion was 16.2degree (range, 1.7degree to 25.5degree). The location of impingement was unique in each case and not predictable based on radiographic measures alone. Virtual osteoplasty in the defined regions of impingement resulted in significant improvements in both hip flexion and internal rotation (P <.05). Conclusions: Computed tomographybased computer modeling can localize regions of anticipated mechanical impingement in symptomatic patients with hip pain. Computer-assisted navigation may be a valuable surgical tool to more accurately and reliably eliminate offending impingement lesions. Level of Evidence: Level IV, diagnostic study. Â© 2012 Arthroscopy Association of North America Notes: DB - Embase UI - 2012032503 IN - (Bedi) MedSport, Section of Sports Medicine and Shoulder Surgery, University of Michigan, 24 Frank Lloyd Wright Dr, Ann Arbor, MI 48106, United States (Dolan) Northwestern Orthopaedic Institute, Chicago, IL, United States (Magennis, Lipman, Buly, Kelly) Center for Hip Pain and Preservation, Hospital for Special Surgery, New York, NY, United States CP - United States LG - English PT - Journal: Article EM - 201204 DD - 20120123

(51) Bedi A, Thompson M, Uliana C, Magennis E, Kelly BT. Assessment of range of motion and contact zones with commonly performed physical exam manoeuvers for femoroacetabular impingement (FAI): what do these tests mean? Hip Int 2013; 23 Suppl 9:S27-S34. Ref ID: 605 Abstract: Recognition of the magnitude and location of mechanical conflicts is critical to reliably and reproducibly improve functional range of motion and outcomes after surgical treatment of femoroacetabular impingement (FAI). The purpose of this study was to assess the ROM and location of intra-articular and extra-articular mechanical conflict with seven commonly performed physical exam manoeuvers in a cohort of hips with symptomatic FAI. Internal rotation in flexion results in mechanical contact between the anterolateral and anterior femoral head-neck junction with the acetabulum, most commonly at a 1:15 o'clock position. Associated adduction, however, significantly reduces the available internal rotation secondary to contact in the same locations. Straight abduction results in mechanical conflict between the superior femoral head-neck junction and the 12:00 o'clock position of the acetabulum. With external rotation of the hip in various degrees of hip flexion, the potential mechanical impingement is extra-articular between the greater trochanter and ischium or pubic ramus. The zones of proximal femoral and acetabular contact are not intuitive, and may extend significantly more laterally and distally on the femoral head-neck junction than previously appreciated Notes: DA - 20131224 IS - 1724-6067 (Electronic) IS - 1120-7000 (Linking) LA - eng PT - Journal Article RN - J280872D1O (Desonide) SB - IM

(52) Bedi A, Warren RF, Wojtys EM, Oh YK, Ashton-Miller JA, Oltean H et al. Restriction in hip internal rotation is associated with an increased risk of ACL injury. Knee Surg Sports Traumatol Arthrosc 2014. Ref ID: 563 Abstract: PURPOSE: Evidence suggests that femoroacetabular impingement (FAI) in athletes may increase the risk of anterior cruciate ligament (ACL) injury. This study correlates ACL injury with hip range of motion in a consecutive series of elite, contact athletes and tests the hypothesis that a restriction in the available hip axial rotation in a dynamic in silico model of a simulated pivot landing would increase ACL strain and the risk of ACL rupture. METHODS: Three hundred and twenty-four football athletes attending the 2012 NFL National Invitational Camp were examined. Hip range of internal rotation was measured and correlated with a history of ACL injury and surgical repair. An in silico biomechanical model was used to study the effect of FAI on the peak relative ACL strain developed during a simulated pivot landing. RESULTS: The in vivo results demonstrated that a reduction in internal rotation of the left hip was associated with a statistically significant increased odds of ACL injury in the ipsilateral or contralateral knee (OR 0.95, p = 0.0001 and p < 0.0001, respectively). A post-estimation calculation of odds ratio for ACL injury based on deficiency in hip internal rotation demonstrated that a 30-degree reduction in left hip internal rotation was associated with 4.06 and 5.29 times greater odds of ACL injury in the ipsilateral and contralateral limbs, respectively. The in silico model demonstrated that FAI systematically increased the peak ACL strain predicted during the pivot landing. CONCLUSION: FAI may be associated with ACL injury because of the increased resistance to femoral internal axial rotation during a dynamic maneuver such as a pivot landing. This insight may lead to better interventions to prevent ACL injury and improved understanding of ACL reconstruction failure. LEVEL OF EVIDENCE: Cohort study, Level IV Notes: DA - 20140911 IS - 1433-7347 (Electronic) IS - 0942-2056 (Linking) LA - ENG PT - JOURNAL ARTICLE

(53) Bellabarba C, Sheinkop MB, Kuo KN. Idiopathic hip instability. An unrecognized cause of coxa saltans in the adult. Clin Orthop Relat Res 1998;(355):261-271. Ref ID: 783 Abstract: The painful, snapping hip often presents a diagnostic dilemma having many potential etiologies. An understanding of the precise cause increases the potential for successful treatment. Five patients with no prior history of significant trauma were evaluated, all of whom had longstanding painful snapping in the groin and consistent symptoms of gait disturbance and increased pain in the provocative position of hip flexion, adduction, and internal rotation. Multiple prior tests and procedures had been nondiagnostic. Simple manual longitudinal traction under fluoroscopy showed subluxation with appearance of a vacuum sign in the symptomatic hip, whereas no such finding was observed on the asymptomatic side. This strongly suggests atraumatic hip instability as a previously unrecognized cause of the painful, snapping hip. The easily obtainable diagnostic traction radiograph is described Notes: DA - 19990210 IS - 0009-921X (Print) IS - 0009-921X (Linking) LA - eng PT - Case Reports PT - Journal Article SB - AIM SB - IM

(54) Bennell KL, Hunt MA, Wrigley TV, Hunter DJ, McManus FJ, Hodges PW et al. Hip strengthening reduces symptoms but not knee load in people with medial knee osteoarthritis and varus malalignment: A randomised controlled trial. Osteoarthritis and Cartilage 18 (5) ()(pp 621-628), 2010 Date of Publication: May 2010 2010;(5):621-628. Ref ID: 440 Abstract: Objective: To determine whether hip abductor and adductor muscle strengthening reduces medial compartment knee load and improves symptoms in people with medial tibiofemoral OA and varus malalignment. Methods: In a randomised controlled trial, 89 participants were randomly allocated to a hip strengthening group or to a control group with no intervention. The strengthening group performed a physiotherapist-supervised home exercise program targeting the hip abductor and adductor muscles for 12 weeks. The primary outcome was the peak external knee adduction moment measured using three-dimensional gait analysis by a blinded assessor. Secondary outcomes included a pain numeric rating scale, Western Ontario and McMaster Universities Osteoarthritis Index, step test, stair climb test, maximum isometric strength of hip and quadriceps muscles and participant-perceived rating of overall change. Intention-to-treat analyses were performed using linear regression modelling adjusting for baseline outcomes and other characteristics. Results: The trial was completed by 76/89 participants (85%). There was no significant between-group difference in change in the knee adduction moment [mean difference (95% confidence interval (CI)) 0.134 (-0.069 to 0.337) Nm/BW x HT%]. All pain, physical function and muscle strength measures showed significantly greater improvement in the strengthening group (all P<0.05). The relative risk (95% CI) of participant-perceived overall improvement in the strengthening group compared to the control group was 20.02 (6.21-64.47). Conclusions: Although strengthening the hip muscles improved symptoms and function in this patient group, it did not affect medial knee load as measured by the knee adduction moment. Thus it is unlikely that hip muscle strengthening influences structural disease progression. Trial registration: ACTR12607000001493. Â© 2010 Osteoarthritis Research Society International Notes: DB - Embase UI - 2010285601 IN - (Bennell, Hunt, Wrigley, McManus, Hinman) Centre for Health, Exercise and Sports Medicine, School of Physiotherapy, University of Melbourne, Australia (Hunter, Li) New England Baptist Hospital, Boston, United States (Hodges) Division of Health and Rehabilitation Sciences, University of Queensland, Australia CP - United Kingdom LG - English PT - Journal: Article EM - 201000 DD - 20100603

(55) Bernarde A. Juvenile pubic symphysiodesis and juvenile pubic symphysiodesis associated with pectineus myotomy: short-term outcome in 56 dysplastic puppies. Vet Surg 2010; 39(2):158-164. Ref ID: 691 Abstract: OBJECTIVES: (1) To compare short-term outcome of juvenile pubic symphysiodesis (JPS) in puppies aged 12-17 weeks with lax hips (group JPS1), in puppies aged 18-22 weeks (group JPS2), and control (group C) puppies; and (2) to document outcome of bilateral pectineus myotomy (PM) associated with JPS in 18-22-week-old puppies (group JPS-PM). STUDY DESIGN: Prospective study. METHODS: Puppies (12-22 weeks) from large and giant breed dogs with a combination of a positive Ortolani sign, poor acetabular coverage (Norberg angle [NA]<or=100 degrees ), and a subluxation index (SI) >0.5 for one or both hips were selected. Puppies aged <18 weeks were randomly assigned to group JPS1 or C. Puppies aged 18-22 weeks were randomly assigned to group JPS2, JPS-PM, or C. Three to 4 months later, surgery was considered successful in pain-free dogs with negative Ortolani sign, normalized acetabular coverage (NA>or=105 degrees ), and SI>0.5. Success rates were compared using Fisher's exact tests: JPS1 versus JPS2 versus C; JPS2 versus JPS-PM. Significance was set at P<.05. RESULTS: All dysplastic hips from nonoperated (C) groups were dysplastic at follow-up, meaning that our criteria for case selection were accurate. JPS1 had significantly better success rate than JPS2 (85 versus 17.8%, respectively). JPS-PM dysplastic hips failed to demonstrate a better outcome than JPS2 hips. CLINICAL RELEVANCE: This study confirms, on a large series of dysplastic hips, the age-dependent effects of JPS, with better results if performed before 18 weeks of age. There is no benefit of adding PM to the procedure in candidates >18 weeks at surgery Notes: DA - 20100309 IS - 1532-950X (Electronic) IS - 0161-3499 (Linking) LA - eng PT - Journal Article PT - Randomized Controlled Trial SB - IM

(56) Bernstein J. The myths of femoroacetabular impingement. Clin Orthop Relat Res 2014; 472(12):3623-3624. Ref ID: 557 Notes: DA - 20141104 IS - 1528-1132 (Electronic) IS - 0009-921X (Linking) LA - eng PT - Journal Article SB - AIM SB - IM

(57) Berton C, Girard J, Krantz N, Migaud H. The Durom large diameter head acetabular component: early results with a large-diameter metal-on-metal bearing. J Bone Joint Surg Br 2010; 92(2):202-208. Ref ID: 693 Abstract: Implantation of a large-diameter femoral head prosthesis with a metal-on-metal bearing surface reduces the risk of dislocation, increases the range of movement, minimises the risk of impingement and, in theory, results in little wear. Between February 2004 and March 2007 we implanted 100 consecutive total hip replacements with a metal-on-metal bearing and a large femoral head into 92 patients. There were 51 men and 41 women with a mean age of 50 years (18 to 70) at the time of surgery. Outcome was assessed using the Western Ontario McMaster University osteoarthritis index and the Harris hip score as well as the Devane activity score. These all improved significantly (p < 0.0001). At the last follow-up there were no cases of dislocation, no impingement, a good range of movement and no osteolysis, but seven revisions, two for infection and five for aseptic loosening. The probability of groin pain increased if the other acetabular component inclination exceeded 50 degrees (p = 0.0007). At 4.8 years of follow-up, the projected survival of the Durom acetabular component, with revision for any reason, was 92.4% (sd 2.8) (95% confidence interval 89.6 to 95.2). The design of the component made it difficult both to orientate and seat, which when combined with a poor porous coating, produced unpredictable fixation and a low survival at five years Notes: DA - 20100204 IS - 0301-620X (Print) IS - 0301-620X (Linking) LA - eng PT - Evaluation Studies PT - Journal Article RN - 0 (Metals) SB - AIM SB - IM

(58) Bertrand SL, Lincoln ED, Prohaska MG. Primary pyomyositis of the pelvis in children: a retrospective review of 8 cases. Orthopedics 2011; 34(12):e832-e840. Ref ID: 647 Abstract: Primary pyomyositis of the pelvic musculature is a condition rarely seen in temperate climates, although its frequency has been increasing in the United States. The condition should be considered in the initial differential diagnosis of an adolescent presenting with fever, difficulty ambulating, and hip pain. This is a retrospective review of 8 cases of primary pelvic pyomyositis in patients aged 18 years or younger who were treated at the Children's Medical Center in Augusta, Georgia. The site of infection was the obturator internus in the majority of the cases (5). The site was the gluteus, iliopsoas, and iliacus in 1 case each. Four patients who were diagnosed early responded to intravenous antibiotics with no need for further intervention. Two patients required incision and drainage of an abscess combined with antibiotics. Two patients had prolonged hospital courses requiring intensive unit care and mechanical ventilation. Blood cultures were positive in 87.5% of patients, and all patients presented with elevated acute phase reactants. One of the most difficult diagnostic aspects of presentation is an inconclusive symptom profile. It is noteworthy that patients with pelvic pyomyositis may present with limited range of motion in a specific plane (the motion placing the infected muscle on stretch) vs global limited range of motion of the joint as is commonly seen in septic arthritis. Early diagnosis is essential to prevent systemic illness and complications associated with this condition. Magnetic resonance imaging with gadolinium is helpful to diagnose and guide treatment Notes: DA - 20111207 IS - 1938-2367 (Electronic) IS - 0147-7447 (Linking) LA - eng PT - Journal Article RN - 0 (Anti-Bacterial Agents) SB - IM

(59) Bertschy B, Luder G, Deschner G, Radlinger L. A new standardized and goal-oriented rehabilitation program for patients after surgical hip dislocation. Physiotherapy (United Kingdom) Conference: World Physical Therapy 2011 Amsterdam Netherlands Conference Start: 20110620 Conference End: 20110623 Conference Publication: (var pagings) 97 ()(pp eS1434), 2011 Date of Publication: June 2011 2011;(United Kingdom):eS1434. Ref ID: 175 Abstract: Purpose: Implementation of a therapy program focusing on the five main goals of rehabilitation: pain reduction, reduction of swelling, increase in flexibility, improvement of strength and endurance after surgical hip dislocation (SHD). Relevance: Femoroacetabular impingement is a pathology, which results from an abnormal morphological relationship between the proximal femur and the acetabulum. The technique of SHD with a trochanter osteotomy is a widely used approach to optimize joint mechanics and to eliminate the impingement. After SHD patients have to walk with reduced weight-bearing (15 kg) for six weeks due to trochanter refixation. It is important to restrict the activity of hip abductors to minimize the risk of instability or translation of the trochanter. Investigations with patients 3 and 12 months after SHD, compared to healthy, showed that patients had substantial deficits in maximum voluntary isometric contraction (MVIC) and rate of force development (RFD) of hip abductors and knee extensors. Further, aerobic endurance was considerably reduced. These deficits may lead to problems in joint stability and restrictions in mobility and daily-living activities. Description: Based on a comprehensive literature search evident and clinical relevant therapy methods were sampled in a therapy program. This acts as a guideline for the rehabilitation and is supplemented by general information about SHD. The rehabilitation program includes four time periods: preoperatively, hospitalization phase, reduced weight bearing phase (till 6 weeks post surgery), and phase of full weight bearing. For each period a set of rehabilitation topics was identified and specific therapy goals were defined. Therapy methods for each of the main topics (pain, swelling, flexibility, strength and endurance) were described in detail. Due to the measured substantial deficits in MVIC and RFD in hip abductors and knee extensors and the reduced aerobic endurance in patient after SHD the rehabilitation concept focuses on the two topics strength training and endurance. Patients receive the program as a booklet, when the surgery is planned. It contains information about the surgery and the rehabilitation, including training methods, exercises, physical therapy applications and recommendations for daily-living activities. Evaluation: The therapy concept is based on literature and own research, thus combining scientific evidence and clinical experience. Currently, the applicability of the program is evaluated at the Bern University Hospital by a questionnaire filled out by the patients and with individual feedback of patients. Further evaluation is planned with a prospective randomized controlled intervention study. Conclusions: Although the exercises and techniques are described in detail, the compliance of the patient and the precise instructions by the therapist remain important in order to reach a satisfactory rehabilitation result. Implications: The rehabilitation program is extensive and time-consuming but nevertheless good applicable in practice. So far it is available only in German language. For some therapists the program may need some adaptations because the exercises are partially performed on training devices and sports equipment. The program contains aspects of physical therapy, education as well as sensorimotor and strength training. Therefore it could easily be modified for other postoperative treatments of the lower extremities such as fractures or total joint replacements Notes: DB - Embase UI - 71884082 IN - (Bertschy, Luder, Deschner) Inselspital, Bern University Hospital, Physiotherapy Institute, Bern, Switzerland (Radlinger) University of Applied Sciences, Health, Bern, Switzerland LG - English PT - Journal: Conference Abstract EM - 201522 DD - 20150519

(60) Beverland D. The transverse acetabular ligament: optimizing version. Orthopedics 2010; 33(9):631. Ref ID: 682 Abstract: In total hip arthroplasty (THA), excessive retroversion is associated with posterior instability, anterior impingement, and resultant groin pain. Excessive anteversion can lead to anterior instability and posterior impingement. The transverse acetabular ligament straddles the inferior limit of the bony acetabulum. It is a strong load-bearing structure and, in the normal hip, in association with the labrum, provides part of the load-bearing surface for the femoral head. It is our hypothesis that the transverse acetabular ligament defines normal version for the acetabulum. In Belfast, we found that using the transverse acetabular ligament helped reduce our primary dislocation rate from 3.7% to 1%. The key is good intraoperative exposure. A grading of 1 to 4 was based on 1000 consecutive cases: (1) normal transverse acetabular ligament easily visible on exposure of the acetabulum, 49%; (2) covered by soft tissue, 35.1%--cleared by blunt dissection; (3) covered by osteophytes, 15.6%--cleared using an acetabular reamer; (4) no transverse acetabular ligament identified, 0.3%. As can be seen, the transverse acetabular ligament is only immediately visible in 49% of cases. In the other 51%, soft tissue or bone must be cleared to define the ligament. The advantages of the transverse acetabular ligament are many. It is independent of patient positioning. The cup version can be individualized by the patient. The surgeon can avoid estimating version angle of 15 degrees to 20 degrees intraoperatively. It is easy to teach and consistently present. It is valuable in minimally invasive surgery. Using the transverse acetabular ligament provides an acceptable dislocation rate with the posterior approach. If the cup is cradled by the transverse acetabular ligament, it helps restore acetabular joint center. However, the transverse acetabular ligament does not help with inclination. We recommend 35 degrees of operative inclination when using the posterior approach Notes: DA - 20100915 IS - 1938-2367 (Electronic) IS - 0147-7447 (Linking) LA - eng PT - Journal Article SB - IM

(61) Bhan S, Malhotra R. Bipolar hip arthroplasty in ankylosing spondylitis. Arch Orthop Trauma Surg 1996; 115(2):94-99. Ref ID: 787 Abstract: Nineteen severely affected hips in 12 young patients with ankylosing spondylitis were treated with bipolar hip arthroplasty followed by a comprehensive postoperative rehabilitation programme. Additional operative procedures of adductor tenotomy, knee flexion release, supracondylar femoral osteotomy for genu valgum and tendo Achillis lengthening for equinus contracture were required in 13 limbs. After a mean follow-up of 45.8 months, results were good in all cases with respect to relief from pain, and there was significant improvement in posture and function. All the patients resumed employment. The average gain in sum total range of hip movements was 194 deg, and the mean preoperative Harris hip score of 27.8 improved to 82.6 after bipolar arthroplasty. Ectopic ossification did not develop in any case. Bipolar hip arthroplasty appears to be ideally suited for young patients with ankylosing spondylitis Notes: DA - 19970320 IS - 0936-8051 (Print) IS - 0936-8051 (Linking) LA - eng PT - Journal Article SB - IM

(62) Biboulet P, Morau D, Aubas P, Bringuier-Branch, Capdevila X. Postoperative analgesia after total-hip arthroplasty: Comparison of intravenous patient-controlled analgesia with morphine and single injection of femoral nerve or psoas compartment block. a prospective, randomized, double-blind study. Reg Anesth Pain Med 2004; 29(2):102-109. Ref ID: 763 Abstract: BACKGROUND: The authors compared the analgesic effects and quality of rehabilitation of three analgesic techniques after total-hip arthroplasty in a double-blind, randomized trial. METHODS: Forty-five patients were assigned to 1 of 3 groups, patient-controlled analgesia with morphine (PCA), femoral nerve block (FNB), or psoas compartment block (PCB). At the end of the procedure performed under general anesthesia, nerve blocks using 2 mg/kg of 0.375% bupivacaine and 2 microg/kg of clonidine were performed in the FNB (n = 16) and PCB (n = 15) groups. In the recovery room, all 3 groups received initial intravenous morphine titration if their pain score was higher than 30 on a 100-mm visual analog scale (VAS), and then a PCA device was initiated. Morphine consumption was the primary end point to assess postoperative analgesia. RESULTS: After extubation (H0), morphine titration was higher in the PCA group (P <.05). During the first 4 postoperative hours (H0 to H4), morphine consumption per hour and VAS pain score were lower in the PCB group (P <.05). After H4, there was no difference in morphine consumption and VAS among groups, either at rest or during mobilization. After H4, morphine consumption remained lower than 0.5 mg/h, and VAS remained lower than 30 mm in the 3 groups. In 4 patients of the PCB group, an epidural diffusion was noted. Hip mobility and length of stay in the rehabilitation center were not different among the groups. CONCLUSIONS: PCA is an efficient and safe analgesia technique. FNB and PCB should not be used routinely after total-hip arthroplasty Notes: DA - 20040318 IS - 1098-7339 (Print) IS - 1098-7339 (Linking) LA - eng PT - Clinical Trial PT - Comparative Study PT - Journal Article PT - Randomized Controlled Trial RN - 0 (Analgesics) RN - 0 (Analgesics, Opioid) RN - 0 (Anesthetics, Local) RN - 76I7G6D29C (Morphine) RN - MN3L5RMN02 (Clonidine) RN - Y8335394RO (Bupivacaine) SB - IM

(63) Bishay SN. Short-term results of musculotendinous release for paralytic hip subluxation in children with spastic cerebral palsy. Ann R Coll Surg Engl 2008; 90(2):127-132. Ref ID: 727 Abstract: INTRODUCTION: Children with paralytic hip subluxation secondary to spastic cerebral palsy were treated with a standard protocol that depended on early detection of the subluxation using clinical examination detecting limited range of hip abduction of <or= 30 degrees and anteroposterior pelvis radiographs detecting subluxation >or= 33% migration as indications. PATIENTS AND METHODS: Patients underwent open adductor longus, proximal gracilis and proximal rectus femoris myotomy, and iliopsoas lengthening with immediate postoperative immobilisation in abduction bar for 3 weeks followed by physiotherapy. The protocol was applied to 50 children with a mean age of 3.6 years with 100 hips surgically corrected. Of these hips initially, 52% were mildly subluxated with <or= 33% migration, 42% were moderately subluxated with > 33-66% migration, and 6% were severely subluxated with > 66% migration. RESULTS: At a final postoperative follow-up of at least 24 months, 22% of these hips were classified as excellent with full containment and no migration, 54% were good with < 20% migration, and 24% were fair with 20-25% migration. No poor result with > 25% migration was obtained. No child developed an abduction contracture or wide-based gait that required treatment. CONCLUSIONS: Early detection and application of this treatment algorithm for children with spastic hip disease should have satisfactory outcomes. Longer follow-up will be required to determine how many children will need bony reconstruction to maintain stable containment of hips at maturity Notes: DA - 20080307 IS - 1478-7083 (Electronic) IS - 0035-8843 (Linking) LA - eng PT - Journal Article SB - IM

(64) Bitersohl B, Hosalkar HS, Zilkens C, Krauspe R. Current concepts in management of slipped capital femoral epiphysis. HIP International 25 (2) ()(pp 104-114), 2015 Date of Publication: 2015 2015;(2):104-114. Ref ID: 171 Abstract: Slipped capital femoral epiphysis (SCFE) is a common hip conditon that can be disabling. In this review, we provide an orientaton on current trends in the clinical management of SCFE including conventonal procedures and specialised surgical developments. Diferent methods of fxaton of the epiphysis, risks of complicatons, and the ratonale of addressing deformity, primarily or secondarily, are presented. Although improved understanding of the anatomy, vascularity and implicatons of residual deformity have changed management strategies, the best modality of treatment that would restore complete vascularity to the femoral head and prevent any residual deformity, impingement and early osteoarthrits remains elusive Notes: DB - Embase UI - 2015083253 IN - (Bitersohl, Zilkens, Krauspe) University of Dusseldorf, Department of Orthopedic Surgery, Dusseldorf, Germany (Hosalkar) Center of Hip Preservaton and Children's Orthopaedics, San Diego, CA, United States CP - Italy LG - English PT - Journal: Review EM - 201524 DD - 20150606

(65) Bizzini M, Notzli HP, Maffiuletti NA. Femoroacetabular impingement in professional ice hockey players: a case series of 5 athletes after open surgical decompression of the hip. Am J Sports Med 2007; 35(11):1955-1959. Ref ID: 736 Abstract: BACKGROUND: Femoroacetabular impingement of the hip joint has been identified as a major cause for hip pain in athletes. Surgical open decompression of the hip has historically been proposed as the first treatment of choice. Functional outcomes in athletes after this procedure are unknown. PURPOSE: To describe the functional and sport-related outcome 2 years after open surgical hip decompression in a group of young professional ice hockey players suffering from cam femoroacetabular impingement. STUDY DESIGN: Case series; Level of evidence, 4. METHODS: Five young professional ice hockey players (mean age, 21.4 y at follow-up) who suffered from cam femoroacetabular impingement were treated with open surgical decompression of the hip. The operation was performed by the same surgeon, and all athletes followed the same rehabilitation guidelines. Mean follow-up time was 2.7 years. Outcome measures were recorded as time to regain symmetrical hip rotation, regain preoperative core/hip muscle strength, return to team practice, and play at competitive level. RESULTS: Hip rotation range of motion was regained by a mean 10.3 weeks. Core and hip strength values reached preoperative levels by a mean 7.8 months. Return to unrestricted team practice with the ice hockey team was achieved by a mean 6.7 months, and athletes were able to play their first competitive game after a mean 9.6 months. Three athletes were able to perform again at the highest level and in international competitions. Two athletes had to return to minor league ice hockey. CONCLUSION: Return to high-level ice hockey after open surgical decompression of the hip was possible in this series of 5 consecutive cases Notes: DA - 20071023 IS - 1552-3365 (Electronic) IS - 0363-5465 (Linking) LA - eng PT - Journal Article SB - IM

(66) Bizzini M. The groin area: the Bermuda triangle of sports medicine? British Journal of Sports Medicine 2011; 45(1):1-2. Ref ID: 72 Notes: IS - 1

(67) Bohannon MJ. Acetabular labral tears in the athlete. Clinics in Sports Medicine 20 (4) ()(pp 779-790), 2001 Date of Publication: 2001 2001;(4):779-790. Ref ID: 522 Abstract: Pathologic involvement of the acetabular labrum is an increasingly recognized phenomenon. Athletes involved in sports that require repetitive twisting or who suffer trauma to the hip are at risk of injury to the acetabular labrum. Injury mechanisms that include hyperextension, hyperflexion, or extremes of abduction place the labrum at particular risk. Symptoms may be acute in onset or, more commonly, insidious onset with persistence or escalation of symptoms. The orthopaedic surgeon evaluating patients with sports-related hip injuries needs to remain cognizant of intraarticular injuries within the hip and, in particular, injuries to the acetabular labrum. Further investigation is needed to fully define the functional importance of the acetabular labrum. Arthroscopic management has been successful in evaluation and management of acetabular labral tears Notes: DB - Embase UI - 2001361087 IN - (Bohannon Mason) Charlotte Hip and Knee Center, Division of Charlotte Orthopaedic Specialists, Charlotte, NC, United States CP - United States LG - English PT - Journal: Review EM - 200100 DD - 20011029

(68) Bohler M, Salzer M. Girdlestone's modified resection arthroplasty. Orthopedics 1991; 14(6):661-666. Ref ID: 789 Abstract: Thirty-three patients were operated for septic (n = 20) and aseptic (n = 13) loosening of their hip prostheses using Girdlestone's operation over 10 years. An average of 46.6 months later, 22 of these patients were given a follow-up examination. Clinical evaluation according to Harris showed an improvement in mean values from 25 to 53 points, which can be attributed mainly to a marked reduction in pain, as function remained poor and the patients still depended on walking aids. The infection ceased in 92% of the patients with septic prosthesis loosening Notes: DA - 19910912 IS - 0147-7447 (Print) IS - 0147-7447 (Linking) LA - eng PT - Journal Article SB - IM

(69) Bonnaire FA, Weber AT. The influence of haemarthrosis on the development of femoral head necrosis following intracapsular femoral neck fractures. Injury 33 (SUPPL 3) ()(pp SC33-SC40), 2002 Date of Publication: December 2002 2002;(SUPPL. 3):SC33-SC40. Ref ID: 517 Abstract: The influence of haemarthrosis on the generation of femoral head necrosis following femoral neck fracture is still under debate. In this study, literature suggestions, our own studies of cadaveric hip joints, and intraoperative measurements of 55 patients will be compared and treatment advice given. A significant dependence on the pressure values could be demonstrated for hip joint position. The highest values were found in extension and internal rotation of the hip joint. Our results also show a dependence of pressure development in the hip joint on the interval between time of trauma and pressure measurement. The pressure values rose within the first 48 hours following trauma and decreased after that. A dependence on the fracture type, age or gender of the patients could not be verified. Pressure values of 20 mmHg or more led to a sonographically confirmed capsule distension. In summary, intraarticular pressure is not predictable for a single case and ultrasound examination of the hip joint is a sensitive screening method. As a therapeutic recommendation we suggest puncture of the joint in the case of a capsule tamponade confirmed by ultrasound with no chance of operation within the next six hours. During all operations a release of pressure of the capsule should be carried out. A preoperative extension in an extended position is not advised Notes: DB - Embase UI - 2002416374 IN - (Bonnaire, Weber) Department of Trauma Surgery, Dresden-Friedrichstadt Hospital, Friedrichstrasse 41, D-01067 Dresden, Germany CP - United Kingdom LG - English PT - Journal: Article EM - 200200 DD - 20021126

(70) Borrelli J, Jr., Goldfarb C, Ricci W, Wagner JM, Engsberg JR. Functional outcome after isolated acetabular fractures. J Orthop Trauma 2002; 16(2):73-81. Ref ID: 773 Abstract: OBJECTIVE: To evaluate objectively the effectiveness of current surgical management of displaced acetabular fractures. To provide insight into how these evaluation methods can be used to identify areas in which improvements in surgery and rehabilitation can be pursued to improve patient outcomes. DESIGN: Consecutive case series. SETTING: University medical center. PATIENTS: Fifteen patients were studied, each with an isolated, displaced acetabular fracture treated with a Kocher-Langenbeck approach. MAIN OUTCOME MEASURES: Primary outcome measures included hip muscle strength, including work (Joules/minute) and maximum torque (30 degrees/second) for abductors/adductors and flexors/extensors. Gait analysis of patients and able-bodied cohorts, including stride length, speed, and cadence, were also assessed. Motion analysis during gait was also studied for each body segment, including the trunk, pelvis, hip, knee, and ankle, in the sagittal, frontal, and axial planes. Motion data for the affected side was compared with motion data for the unaffected side, and linear gait findings for the study patients were compared to able-bodied cohorts. An assessment of clinical outcome was performed by completion of a validated Musculoskeletal Function Assessment (MFA) questionnaire and the were results correlated with muscle strength and gait analysis. Secondary outcome measures included adequacy of fracture reduction, radiographic grade, the presence and severity of heterotopic ossification at the time of the most recent follow-up, and passive range of motion of the affected and unaffected hips. RESULTS: No statistical differences in muscle strength for each of the major muscle groups were found when the affected limb was compared with the unaffected limb. No statistical differences were found between the study patients and the able-bodied cohorts with regards to stride length, gait speed, and cadence. The only significant difference found in body segment position was trunk inclination. When the study patients were compared with able-bodied cohorts, the patients tended to walk with greater forward inclination of their trunks; this was true for all phases of gait. Total MFA scores averaged 22 (range, 0-57). Patients could be separated into two separate groups based on their total MFA score. One group (n = 6) had an average MFA score of 7 (range, 0-10), while a second group (n = 9) had an average MFA score of 32 (range, 12-57). The scores of study patients as a whole, and those of each individual group of patients, were compared with known MFA scores for nonpatients and patients in the Orthopaedic Trauma Association/Association for the Study of Internal Fixation (OTA/AO) injury group (hip and thigh). When the muscle strengths of these two groups of patients were compared, all hip flexion and extension variables were significantly weaker in the group with an average MFA score of 32, whereas none of the gait variables were different between the two groups. At an average follow-up of 24 months, seven patients had an excellent radiographic grade, four patients had a good grade, two patients had a fair grade, and two patients had a poor grade. These radiographic grades were in contrast to achieving an anatomic reduction in eleven patients, a satisfactory reduction in three patients, and an unsatisfactory reduction in one patient. Heterotopic ossification was found in eight patients, four patients had Grade 1, and four patients, had Grade 2. No statistically significant differences were observed when each MFA group was compared with each of these radiographic variables. Passive hip range of motion was not statistically different when the affected hip was compared with the unaffected hip. CONCLUSIONS: Standardized muscle strength determination, gait, and motion analysis, and completion of an MFA questionnaire provided a thorough and revealing evaluation of patients who have undergone open reduction and internal fixation (ORIF) of a displaced acetabular fracture. Minimal alterations in body posture and affected limb motion were present in patients displaying relatively normal gait parameters, including stride length, speed, and cadence. Despite dissection of the hip musculature during surgery, normal muscle strength recovery was possible after operative repair of these acetabular fractures. However, functional outcome, as determined by MFA scores, was considerably poorer in those patients with significantly weaker hip flexion and extension strength, compared with those of patients with more desirable MFA scores. Based on the current data, it appears that the use of these and similar evaluation instruments can allow determination of factors that negatively affect outcome (hip flexion and extension strength), which otherwise may remain unknown. It is possible that identification and treatment of these factors will improve the quality of life for patients after this type of injury Notes: DA - 20020130 IS - 0890-5339 (Print) IS - 0890-5339 (Linking) LA - eng PT - Journal Article SB - IM

(71) Botser IB, Martin DE, Stout CE, Domb BG. Tears of the ligamentum teres: prevalence in hip arthroscopy using 2 classification systems. Am J Sports Med 2011; 39 Suppl:117S-125S. Ref ID: 663 Abstract: BACKGROUND: The ligamentum teres (LT) anatomy has been known for many years. While its functionality remains debatable, it is well recognized that the LT can be a source of pain in the hip joint. In 1997, a landmark publication by Gray and Villar established a classification for LT tears and increased the awareness of LT disorders. However, the incidence of LT tears and the various tear types is unknown. PURPOSE: The authors report the prevalence of LT tears in a population of patients who underwent hip arthroscopy, using both the Gray and Villar classification and a new descriptive classification. STUDY DESIGN: Case series; Level of evidence, 4. METHODS: Between February 2008 and January 2011, 616 hip arthroscopies were performed by the senior author. After excluding revision surgeries, a total of 558 surgeries (502 patients) were included in the study. Data were collected regarding patients' demographics, mechanism of injury, range of motion, magnetic resonance results, and intraoperative findings. Preoperative hip-specific questionnaire scores and pain level were recorded as well. Ligamentum teres tears were classified according to Gray and Villar's classification, and were also categorized using a descriptive grading system as follows: 0, no tear; 1, <50% tear; 2, >50% tear; or 3, 100% tear. RESULTS: A total of 284 (51%) of the 558 surgeries in this cohort revealed LT tears. According to the descriptive grading system, 22% were grade 1, 24% were grade 2, and 5% were grade 3. According to the Gray and Villar classification 3.7% had full rupture, 43% had a partial tear, and 4.5% had a degenerative tear. Patients with LT tears were significantly older and had worse preoperative functional scores; they did, however, have a greater range of motion. Intraoperatively, an association with larger labral tear size and acetabular chondral damage was found. Magnetic resonance arthrography was found to have low accuracy and sensitivity in detection of LT tears. No correlation to the pain level was found. CONCLUSION: Ligamentum teres tears had a higher prevalence in this study than was published in the past, most probably attributable to a lower threshold used in defining a tear. The incidence is defined both using the Gray and Villar classification, as well as a new descriptive classification system that categorizes the LT according to amount of tearing Notes: DA - 20110628 IS - 1552-3365 (Electronic) IS - 0363-5465 (Linking) LA - eng PT - Journal Article SB - IM

(72) Bouvard M, Lippa A, Reboul G. Therapeutic strategy of athletic pubalgia. [French]. Kinesitherapie 12 (125) ()(pp 23-28), 2012 Date of Publication: May 2012 2012;(125):23-28. Ref ID: 364 Abstract: Athletic pubalgia is a disease affecting all the locomotor structures of the anterior part of the pelvic girdle. Distribution is worldwide, and almost exclusively male. There is at present no consensus as to nosology or treatment. Evolution is generally toward gradual chronicity, although acute traumatic forms are also found. Four clinical forms are regularly found together: involvement of the pubic symphysis and its appendages; lower rectus abdominis lesions, near the insertions; tendinopathy of the adductor body and insertion, which may be complicated by obturator nerve canal syndrome; and inguinal canal involvement due to wall defect and ilio-inguinal and ilio-hypogastric nerve damage. Initial treatment is generally medical, lasting 3 months, beginning with pain management followed by individualized rehabilitation to compensate the weak points of pelvic girdle and hip force/flexibility. In the second phase, neurophysiological work is followed by general physical and then specific training. Unfavorable evolution at 3 months despite treatment casts doubt on the diagnosis. Surgery is indicated if the inguinal canal is affected, whether or not any tendon sectors are involved. In difficult cases, anesthetic block contributes usefully to diagnosis. Twelve weeks on average are necessary for return to competitive sport after surgery. Primary and secondary prevention influence long-term prognosis. Level of evidence: Not adapted. Â© 2012 Elsevier Masson SAS. All rights reserved Notes: DB - Embase UI - 2012408648 IN - (Bouvard) Centre de Biologie et Medecine du Sport de Pau, 4 boulevard Hauterive, 64046 Pau cedex, France (Lippa) Imagerie Medicale, Hopital de Pau, 64046 Pau cedex, France (Reboul) Unite de Chirurgie Parietoabdominale, Clinique du Sport, 33700 Merignac, France CP - France OT - Strategie therapeutique de la pubalgie du sportif LG - French PT - Journal: Review EM - 201232 DD - 20120802

(73) Brisson N, Lamontagne M, Kennedy MJ, Beaule PE. The effects of cam femoroacetabular impingement corrective surgery on lower-extremity gait biomechanics. Gait Posture 2013; 37(2):258-263. Ref ID: 628 Abstract: Surgery to correct cam femoroacetabular impingement (FAI) is increasingly popular. Nevertheless, no known study has analyzed both the three-dimensional lower-extremity joint kinematics and kinetics to quantify FAI surgical outcomes. The purpose of this study was to determine the effects of FAI surgery on the affected lower-extremity joint mechanics during gait by comparing the three-dimensional hip, knee, ankle and pelvic angular displacements, as well as the hip, knee and ankle moments and powers of preoperative and postoperative FAI groups, and a healthy control group. Ten patients with unilateral symptomatic cam FAI, who underwent corrective surgery using an open or combined technique, participated in the biomechanical analysis of level walking preoperatively and postoperatively. Thirteen healthy control subjects provided normative data. Results showed that gait biomechanics of FAI patients did not return to normal after surgery. Postoperatively, patients had reduced hip frontal and sagittal plane ROM, smaller peak hip abduction and internal rotation moments, and decreased peak hip power generation compared to the control group. Despite reductions in hip pain, hip impairments and trends detected preoperatively, perhaps due to modified gait patterns, persisted postoperatively. Additional discrepancies in lower-extremity joint mechanics were observed postoperatively, which are believed to have resulted from partial muscle impairment caused by the surgical approaches. Further research is required to confirm the reasons for which lower-extremity gait mechanics of FAI patients do not return to normal following surgery. Clarifying these causes could help improve surgical techniques and rehabilitation programs for the treatment of FAI, and thus improve surgical outcomes Notes: DA - 20130125 IS - 1879-2219 (Electronic) IS - 0966-6362 (Linking) LA - eng PT - Journal Article PT - Research Support, Non-U.S. Gov't SB - IM

(74) Broadbent S, Coutts R, Coetzee S. Physical and injury profiles of Australian female dragon boat paddlers: a pilot study. Journal of Fitness Research 2014; 3(2):3-13. Ref ID: 47 Notes: IS - 2

(75) Brooks P, Bershadsky B. Femoroacetabular impingement: a resurfacing solution. J Bone Joint Surg Br 2012; 94(11 Suppl A):32-35. Ref ID: 623 Abstract: Femoroacetabular impingement (FAI) is commonly associated with early hip arthritis. We reviewed our series of 1300 hip resurfacing procedures. More than 90% of our male patients, with an average age of 53 years, had cam impingement lesions. In this condition, there are anterior femoral neck osteophytes, and a retroverted femoral head on a normally anteverted neck. It is postulated that FAI results in collision of the anterior neck of the femur against the rim of the acetabulum, causing damage to the acetabular labrum and articular cartilage, resulting in osteoarthritis. Early treatment of FAI involves arthroscopic or open removal of bone from the anterior femoral neck, as well as repair or removal of labral tears. However, once osteoarthritis has developed, hip replacement or hip resurfacing is indicated. Hip resurfacing can re-orient the head and re-shape the neck. This helps to restore normal biomechanics to the hip, eliminate FAI, and improve range of motion. Since many younger men with hip arthritis have FAI, and are also considered the best candidates for hip resurfacing, it is evident that resurfacing has a role in these patients Notes: DA - 20121102 IS - 0301-620X (Print) IS - 0301-620X (Linking) LA - eng PT - Evaluation Studies PT - Journal Article SB - AIM SB - IM

(76) Brophy RH, Chiaia TA, Maschi R, Dodson CC, Oh LS, Lyman S et al. The core and hip in soccer athletes compared by gender. International Journal of Sports Medicine 30 (9) ()(pp 663-667), 2009 Date of Publication: 2009 2009;(9):663-667. Ref ID: 458 Abstract: Gender differences in hip and core strength and range of motion may contribute to the gender based variance in injury risk. This study was designed to test the primary hypothesis that hip and core strength, flexibility and lower extremity dynamic alignment differ in male and female soccer athletes. Ninety-eight collegiate soccer players (54 male, 44 female) participated in this study. Athletes were evaluated for hip range of motion, and hip and abdominal strength. Both male and female soccer players demonstrated limited hip rotation, with less hip internal rotation in males (p<0.0001), and poor abdominal core control, although the males are stronger (p=0.02). Overall hip ROM is shifted towards internal rotation in females compared to males. Female soccer players also have a significant side-to-side disparity in hip abductor strength (p<0.0001), not present in males. The shift in hip ROM towards internal rotation combined with the hip abductor imbalance may be associated with a position of ACL risk with internally rotated hips and valgus knees in female soccer players. Limitations in hip and core strength and range of motion may play a role in the disparity between the male and female rate of ACL injury Notes: DB - Embase UI - 2009563095 IN - (Brophy) Washington University School of Medicine, Department of Orthopedics, St. Louis, United States (Chiaia, Maschi) Hospital for Special Surgery, Rehabilitation, New York, United States (Dodson, Allen, Williams) Hospital for Special Surgery, Sports Medicine, New York, United States (Oh) Massachusetts General Hospital, Department of Orthopaedic Surgery, Boston, United States (Lyman) Hospital for Special Surgery, Research, New York, United States CP - Germany LG - English PT - Journal: Article EM - 200900 DD - 20091210

(77) Brown MD, Gomez-Marin O, Brookfield KF, Li PS. Differential diagnosis of hip disease versus spine disease. Clin Orthop Relat Res 2004;(419):280-284. Ref ID: 764 Abstract: Many clinicians find it difficult to differentiate between symptoms caused by a spine disorder or a hip disorder. If surgery is indicated, the order in which these operations take place is an important factor in the patient's long-term outcome. A prospective evaluation and retrospective chart review of patients with lower extremity pain was performed at the principal investigator's clinic to determine which signs and symptoms best predict the primary source of pain in patients with hip and spine disorders. Medical histories, physical examinations, and diagnostic tests were done on 97 patients with lower extremity pain to determine which signs and symptoms were the best predictors of a primary source of the pain (a hip or a spine disorder). The presence of a limp, groin pain, or limited internal rotation of the hip significantly predicted the diagnosis of a disorder as originating primarily from the hip, as opposed to originating from the spine. Patients with a limp were seven times more likely to have a hip disorder only or a hip and spine disorder than a spine only disorder. Similarly, patients with groin pain or limited internal rotation of the hips were seven and 14 times, respectively, more likely to have a hip disorder only or a hip and spine disorder than a spine only disorder. These variables are of primary importance to the clinician when making a differential diagnosis between hip disease and spine disease Notes: DA - 20040315 IS - 0009-921X (Print) IS - 0009-921X (Linking) LA - eng PT - Journal Article SB - AIM SB - IM

(78) Brumitt J. Exercise to Reduce the Risk of a Groin Strain Injury. Performance Training Journal 2009; 8(5):15-17. Ref ID: 23 Notes: IS - 5

(79) Brumitt J. Stretching Exercises to Improve the Flexibility of the Inner Thigh. Performance Training Journal 2010; 9(4):15-17. Ref ID: 61 Notes: IS - 4

(80) Brunner A, Horisberger M, Herzog RF. Sports and recreation activity of patients with femoroacetabular impingement before and after arthroscopic osteoplasty. American Journal of Sports Medicine 2009; 37(5):917-922. Ref ID: 132 Abstract: BACKGROUND: Hip arthroscopy represents a new and minimally invasive method of treating patients with femoroacetabular impingement (FAI). However, participation in popular sports after this procedure has not yet been analyzed. HYPOTHESES: Arthroscopic treatment of FAI increases the level of popular sports activities, and this level of activity correlates with the clinical outcome in terms of pain and function. STUDY DESIGN: Case series; Level of evidence, 4. METHODS: Fifty-three patients (41 male, 12 female) were evaluated preoperatively and after a mean follow-up of 2.4 years (range, 2-3.2 years) after arthroscopic osteoplasty for cam and mixed FAI. Evaluation included the type and level of sports activities (sports frequency score [SFS]) as well as clinical outcome in terms of pain (VAS) and function (nonarthritic hip score [NAHS]). RESULTS: Forty-five of the 53 patients had regularly participated in popular sports until the first occurrence of FAI symptoms. Preoperatively, only 4 of these 45 patients had maintained their accustomed level of activity. At the final follow-up, 31 patients had returned to their full accustomed level of activity. None of the patients who had not been active in sports before the first occurrence of symptoms of FAI (n = 8) had begun participation in sports after arthroscopic osteoplasty. The SFS significantly increased from 0.78 to 1.84 (P < .001), and the mean VAS pain score significantly improved from 5.7 (range, 1-9) to 1.5 (range, 0-6) points (P < .001). The NAHS improved from 54.4 (range, 28.75-92.5) to 85.7 (range, 47.5-100) (P < .001). There was no significant correlation between SFS and NAHS (r = .051, P = .35), as well as between SFS and VAS pain score (r = .159, P = .140) preoperatively, but a significant correlation was seen at the time of the last postoperative follow-up (SFS/NAHS: r = .392, P = .003; SFS/VAS: r = .242, P = .049). The 3 most frequent sports activities postoperatively were biking, hiking, and fitness. CONCLUSION: Arthroscopic osteoplasty can significantly improve the rate and level of popular sports activities in patients with FAI. The level of postoperative sports activity directly correlates with the clinical outcome in terms of pain and function Notes: ID - 105525427 IS - 5 CY - Thousand Oaks, California

(81) Brunner A, Horisberger M, Herzog RF. Evaluation of a computed tomography-based navigation system prototype for hip arthroscopy in the treatment of femoroacetabular cam impingement. Arthroscopy 2009; 25(4):382-391. Ref ID: 709 Abstract: PURPOSE: The purpose of this study was to investigate the impact of a new computed tomography-based computer navigation system on the accuracy of arthroscopic offset correction in patients with cam type femoroacetabular impingement (FAI), and to evaluate if the accuracy of offset restoration compromises the early clinical outcome. METHODS: We prospectively treated 50 patients (25 navigated and 25 non-navigated) by hip arthroscopy and arthroscopic offset restoration for cam FAI. The patients were a mean age 42.9 years, and the average follow-up was 26.7 months, with no patients lost to follow-up. Magnetic resonance imaging scans were performed preoperatively and 6 weeks postoperatively. A postoperative alpha angle of less than 50 degrees or a reduction of the alpha angle of more than 20 degrees was considered to be successful offset restoration. Outcomes were measured with a visual analogue scale for pain, range of motion, and the nonarthritic hip score. RESULTS: The mean alpha angle improved from 76.5 degrees (range, 57 degrees to 110 degrees) to 54.2 degrees (range, 40 degrees to 84 degrees). In both the navigated and the non-navigated groups, 6 patients (24%) showed insufficient offset correction. Range of motion, visual analogue scale for pain scores, and nonarthritic hip scores significantly improved in all subgroups. Statistical analysis showed no significant difference regarding the clinical outcome between patients with sufficient and insufficient correction of the alpha angle. CONCLUSIONS: In this series, a significant percentage of patients (24%) showed an insufficient correction of the alpha angle after hip arthroscopy for cam FAI. This study shows that the presented navigation system could not improve this rate and that the insufficient accuracy of reduction of the alpha angle does not appear to compromise the early clinical outcome. LEVEL OF EVIDENCE: Level II, prospective comparative study Notes: DA - 20090403 IS - 1526-3231 (Electronic) IS - 0749-8063 (Linking) LA - eng PT - Comparative Study PT - Evaluation Studies PT - Journal Article SB - IM

(82) Bulut O, Ozturk H, Tezeren G, Bulut S. Arthroscopic-assisted surgical treatment for developmental dislocation of the hip. Arthroscopy 2005; 21(5):574-579. Ref ID: 752 Abstract: PURPOSE: Treatment of developmental dislocation of the hip (DDH) includes surgical management in older children or in those who cannot be treated conservatively. However, complication rates of surgical treatment are quite high. The purpose of this report is to introduce our new surgical technique that can eliminate existing pathologic changes in DDH. TYPE OF STUDY: A small case series. METHODS: We performed arthroscopic-assisted surgical treatment in 4 hips of 4 female children who had DDH and no previous treatment. Their ages ranged from 11 to 14 months. Closed reduction under general anesthesia was tried just before the surgical intervention, but it failed in all of them. Tightness of the iliopsoas tendon was released followed by dissection of capsular adhesions using an anterolateral mini-incision. Excision of the hypertrophic ligamentum teres, transverse acetabular ligament, and pulvinar tissue was carried out using a double-portal arthroscopic procedure. We performed percutaneus adductor tenotomies in 2 cases. A spica cast and abduction splint were used for 12 to 17 weeks postoperatively. The follow-up of the patients was a minimum of 1 year. Although a 1-year follow-up period is adequate to evaluate the short-term results, it has been considered that there is a need for further studies that include long-term follow-up. We used the acetabular index and Shenton's line for preoperative and postoperative radiologic evaluation. Also, the cases were evaluated postoperatively in respect to range of motion restriction and the leg length discrepancy. RESULTS: The mean follow-up was 13.7 months (range, 12 to 16 months). Acetabular index measurements of the cases in the preoperative/postoperative periods were as follows: in the first case, 34 degrees/27 degrees; in the second case, 35 degrees/22 degrees; in the third case, 52 degrees/39 degrees; and in the fourth case, 40 degrees/28 degrees. Hip joint restriction and leg length discrepancy were not observed postoperatively. CONCLUSIONS: All the intra-articular structures (hypertrophic ligamentum teres, transverse acetabular ligament, and pulvinar tissue) in the acetabulum that impede the reduction of the femoral head have been eliminated by using the arthroscopic technique. The arthroscopic-assisted surgical treatment of DDH is successful in the short-term follow-up period. LEVEL OF EVIDENCE: Level IV, Case Series Notes: DA - 20050513 IS - 1526-3231 (Electronic) IS - 0749-8063 (Linking) LA - eng PT - Journal Article SB - IM

(83) Bussey MD, Milosavljevic S. Asymmetric pelvic bracing and altered kinematics in patients with posterior pelvic pain who present with postural muscle delay. Clinical Biomechanics 2015; 30(1):71-77. Ref ID: 96 Abstract: Background The purpose of the study was to examine the muscle activity and hip-spine kinematics in a group of individuals diagnosed with posterior pelvic girdle pain and confirmed postural muscle delay during a repeated fast hip flexion task. Methods Twenty-four (12 pain and 12 control) age and sex matched participants performed a repeated fast hip flexion task to auditory signal. Surface EMG activity in the external and internal oblique, the multifidus, the gluteus maximus and biceps femoris in the stance-limb was examined for onset timing and EMG integral. Sagittal plane hip (swing limb) and spine kinematics were examined for group and side differences over the repeated trials. Findings While the pain group lacked significant feedforward muscle activity they displayed higher muscle activity at movement onset in the biceps femoris bilaterally (p < 0.05) as well as the external oblique (p < 0.05) during motion of the symptomatic side. Furthermore, the pain group experienced asymmetrical spinal range of motion with increased motion on the contralateral side (p < 0.001) and reduced flexion velocity on the symptomatic side (p < 0.001). Interpretation The findings support previous hypotheses regarding the effect of increased biceps activity on pelvic control during lumbo-pelvic rotation. Further, there appears to be a symptom led strategy for bracing the innominate through opposing tension in the biceps and external oblique during movement of the painful side. Such asymmetrical pelvic girdle bracing may be a strategy to increase the stability of the pelvis in light of the failed load transfer mechanism. Putatively, this strategy may increase the mechanical stress on the sacroiliac joint exacerbating pain complaints Notes: ID - 103880300 IS - 1 CY - New York, New York

(84) Byrd JW, Jones KS. Arthroscopic management of femoroacetabular impingement. Instr Course Lect 2009; 58:231-239. Ref ID: 706 Abstract: Femoroacetabular impingement is a well-recognized cause of intra-articular pathology and secondary osteoarthritis among young adults. It has been proposed that femoroacetabular impingement that does not require periacetabular osteotomy sometimes can be managed by arthroscopic methods. Clinically relevant impingement is suspected based on the patient history, examination findings, and radiographic features. Pathologic impingement is then substantiated based on the arthroscopic parameters of characteristic intra-articular pathology. Early experience has shown that hip arthroscopy can achieve results that compare favorably to open methods in patients with femoroacetabular impingement Notes: DA - 20090423 IS - 0065-6895 (Print) IS - 0065-6895 (Linking) LA - eng PT - Journal Article PT - Research Support, Non-U.S. Gov't SB - IM

(85) Byrd JW, Jones KS. Arthroscopic femoroplasty in the management of cam-type femoroacetabular impingement. Clin Orthop Relat Res 2009; 467(3):739-746. Ref ID: 715 Abstract: Cam-type femoroacetabular impingement is a recognized cause of intraarticular pathology and secondary osteoarthritis in young adults. Arthroscopy is reportedly useful to treat selected hip abnormalities and has been proposed as a method of correcting underlying impingement. We report the outcomes of arthroscopic management of cam-type femoroacetabular impingement. We prospectively assessed all 200 patients (207 hips) who underwent arthroscopic correction of cam impingement from December 2003 to October 2007, using a modified Harris hip score. The minimum followup was 12 months (mean, 16 months; range, 12-24 months); no patients were lost to followup. The average age was 33 years with 138 men and 62 women. One hundred and fifty-eight patients (163 hips) underwent correction of cam impingement (femoroplasty) alone while 42 patients (44 hips) underwent concomitant correction of pincer impingement. The average increase in Harris hip score was 20 points; 0.5% converted to THA. We had a 1.5% complication rate. The short-term outcomes of arthroscopic treatment of cam-type femoroacetabular impingement are comparable to published reports for open methods with the advantage of a less invasive approach Notes: DA - 20090204 IS - 1528-1132 (Electronic) IS - 0009-921X (Linking) LA - eng PT - Journal Article SB - AIM SB - IM

(86) Cadossi M, Tedesco G, Savarino L, Baldini N, Mazzotti A, Greco M et al. Effect of acetabular cup design on metal ion release in two designs of metal-on-metal hip resurfacing. J Biomed Mater Res B Appl Biomater 2014; 102(7):1595-1601. Ref ID: 574 Abstract: The purpose of this observational prospective cohort study was to evaluate the serum concentrations of cobalt (Co), chromium (Cr), and nickel (Ni) at a 2-year follow-up in patients operated on with a novel design of hip resurfacing: Romax resurfacing system (RRS). RRS is characterized by the presence of an acetabular notch which theoretically provides a wider range of motion and a reduced incidence of groin pain. The presence of radiolucencies and functional outcome, assessed using the Harris hip score (HHS) and the University of California Activity scale (UCLA), were secondary endpoints. Moreover, these results were compared with those obtained in our previous study from a similar cohort of patients implanted using the Birmingham Hip Resurfacing (BHR) system. At a 2-year follow-up, the serum levels of Co in patients operated on using the RRS were five times higher (p = 0.0002) than those found before surgery (Co, means: 1.04 and 0.20 ng/mL, respectively); similarly, Cr levels were 13 times higher (p < 0.0001) at a 2-year follow-up than before surgery (Cr, means: 1.69 and 0.13 ng/mL, respectively). Ni concentrations (0.42 and 0.78 ng/mL) were not significantly different (p = 0.16), even if they increased 86% after surgery. In the RRS patients, an inverse correlation was found between Co and Cr concentrations and length of follow-up (Co: r = -0.64, p = 0.0096; Cr: r= -0.45, p = 0.08). The serum levels of Co and Cr were not significantly different between RRS (Co: 1.04 ng/mL and Cr: 1.69 ng/mL) and BHR (Co: 1.39 ng/mL and Cr: 2.30 ng/mL) patients at 2 years (p = 0.95 and 0.26 for Co and Cr, respectively). Our results showed that RRS patients achieved an excellent clinical outcome with limited metal ion release Notes: DA - 20140908 IS - 1552-4981 (Electronic) IS - 1552-4973 (Linking) LA - eng PT - Clinical Trial PT - Journal Article PT - Observational Study RN - 0 (Metals, Heavy) SB - IM

(87) Cakic J, Patricios J. Femoroacetabular impingement: prevention or intervention? The sports physician's quandary. British Journal of Sports Medicine 2014; 48(4):1073-1075. Ref ID: 28 Notes: IS - 14

(88) Carsen S, Moroz PJ, Rakhra K, Ward LM, Dunlap H, Hay JA et al. The Otto Aufranc Award. On the etiology of the cam deformity: a cross-sectional pediatric MRI study. Clin Orthop Relat Res 2014; 472(2):430-436. Ref ID: 610 Abstract: BACKGROUND: Femoroacetabular impingement (FAI) has been recognized as a common cause of hip pain as well as a cause of hip arthritis, yet despite this, little is known about the etiology of the cam morphology or possible risk factors associated with its development. QUESTIONS/PURPOSES: The purposes of our study were to determine when the cam morphology associated with FAI developed in a cross-sectional cohort study of pediatric patients pre- and postphyseal closure using MRI and whether increased activity level during the period of physeal closure is associated with an increased likelihood that the cam deformity will develop. METHODS: Alpha angles were measured at the 3 o'clock (anterior head-neck junction) and 1:30 (anterosuperior head-neck junction) positions in both hips with a cam deformity defined as an alpha angle >/= 50.5 degrees at the 3 o'clock position. Forty-four volunteers (88 hips) were studied: 23 with open physes (12 females, mean age 9.7 years; 11 males, age 11.7 years) and 21 with closed physes (five females, age 15.2 years; 16 males, age 16.2 years). Daily activity level using the validated Habitual Activity Estimation Scale was compared for patients in whom cam morphology did and did not develop. RESULTS: None of the 23 (0%) patients prephyseal closure had cam morphology, whereas three of 21 (14%, p = 0.02; all males) postclosure had at least one hip with cam morphology. Daily activity level was higher (p = 0.02) for patients with the cam morphology (7.1 hours versus 2.9 hours). Mean alpha angles at the 3 o'clock head-neck position were 38 degrees (95% confidence interval [CI], 37.2 degrees -39.1 degrees ) in the open physes group and 42 degrees (95% CI, 40.16 degrees -43.90 degrees ) in the closed physes group; at the 1:30 head-neck position, they were 45 degrees (95% CI, 44.0 degrees -46.4 degrees ) in the open physes group and 50 degrees (47.9 degrees -52.3 degrees ) in the closed physes group. CONCLUSIONS: The fact that cam morphology was present exclusively in the closed physeal group strongly supports its development during the period of physeal closure with increased activity level as a possible risk factor Notes: DA - 20140113 IS - 1528-1132 (Electronic) IS - 0009-921X (Linking) LA - eng PT - Comparative Study PT - Journal Article PT - Research Support, Non-U.S. Gov't SB - AIM SB - IM

(89) Casartelli NC, Leunig M, Item-Glatthorn JF, Lepers R, Maffiuletti NA. Hip flexor muscle fatigue in patients with symptomatic femoroacetabular impingement. Int Orthop 2012; 36(5):967-973. Ref ID: 651 Abstract: PURPOSE: Patients with symptomatic femoroacetabular impingement (FAI) have considerable hip muscle weakness, in particular, hip flexion and hip adduction. In addition, they experience disabilities while performing prolonged dynamic tasks. It was therefore postulated that, besides hip flexor muscle weakness, patients with symptomatic FAI would show greater hip flexor fatigue compared with healthy controls. METHODS: Hip flexor fatigue was evaluated in two different experiments. Fifteen patients with symptomatic FAI and 15 age-matched healthy controls were tested in each experiment. In the first one, changes in hip flexor torque fluctuations and electromyographic (EMG) activity were measured during a sustained submaximal isometric contraction. In the second experiment, hip flexor torque decline was measured during a series of 20 maximal dynamic contractions. RESULTS: Patients with FAI exhibited hip flexor weakness under both isometric (P = 0.02) and isokinetic conditions (P = 0.03). Fatigue-induced changes in isometric hip flexor torque fluctuations, EMG root mean square and median frequency did not differ significantly between patients and controls (P > 0.05). Similarly, isokinetic hip flexor torque decline was comparable in patients with FAI and controls (P > 0.05). CONCLUSIONS: None of the hip flexor fatigue outcomes considered here differed between patients with symptomatic FAI and controls. Therefore, the disabilities that patients experience while performing prolonged dynamic tasks do not seem to be caused by exaggerated hip flexor muscle fatigue Notes: DA - 20120424 IS - 1432-5195 (Electronic) IS - 0341-2695 (Linking) LA - eng PT - Journal Article SB - IM

(90) Casartelli NC, Maffiuletti NA, Item-Glatthorn JF, Impellizzeri FM, Leunig M. Hip muscle strength recovery after hip arthroscopy in a series of patients with symptomatic femoroacetabular impingement. Hip Int 2014; 24(4):387-393. Ref ID: 579 Abstract: PURPOSE: The aim of the study was to prospectively evaluate hip muscle strength in a series of patients with symptomatic FAI after hip arthroscopy. METHODS: Hip muscle strength of eight patients (age: 29 +/- 10 years) was evaluated preoperatively and 2.5 years after hip arthroscopy, and was compared to eight matched controls. Maximal voluntary contraction (MVC) strength was measured for all hip muscle groups. At follow-up, we used the symptom-specific well-being outcome to assess the acceptability of the health state related to the hip. RESULTS: Patients showed MVC strength increases for all hip muscles (9-59%, P<.05). At follow-up, only hip flexor MVC strength was lower for patients than controls (-18%, P<.05). At follow-up, four patients (out of eight) were "neither satisfied nor dissatisfied" with the health state of their operated hip. CONCLUSIONS: Patients with symptomatic FAI recovered their hip muscle strength to normal levels 2.5 years after hip arthroscopy, except for hip flexors. Although all patients showed good hip muscle strength at follow-up, half of them were not completely satisfied with their health state related to the hip Notes: DA - 20140729 IS - 1724-6067 (Electronic) IS - 1120-7000 (Linking) LA - eng PT - Journal Article SB - IM

(91) Casta A, Walusz H. Hip injuries in division I soccer players-a rehabilitation protocol for return to play. Clinical Journal of Sport Medicine Conference: 24th Annual Meeting of the American Medical Society for Sports Medicine, AMSSM 2015 Hollywood, FL United States Conference Start: 20150414 Conference End: 20150417 Conference Publication: (var pagings) 25 2015;(var.pagings):204. Ref ID: 168 Abstract: Purpose: To determine if the rehabilitation and return to play protocol for hip injuries in athletes who play soccer, used at Boston University reduced number of days missed from playing the sport. Methods and Study Design: Retrospective cohort study. Using data from athletic training medical records data bank we searched for hip pain visits in soccer athletes from fall season of 2013 and 2014. Inclusion criteria included diagnosis of acute or recurrent hip pain, groin pain, hip tightness, and thigh strain in female and male soccer athletes. Search consisted of 2500 collegiate athletes, 92 had hip pain. Data was de- identified, reviewed for rehabilitation techniques used, return to play protocol, and time missed playing soccer. A statistical analysis (ANOVA) was performed and compared to recent data of multiple articles which stated the return to play time in soccer players with hip injuries of 6 to 8 weeks. Results: Of 92 athletes at BU 41 were females and 52 males, all reported hip injury as defined above. All athletes return to soccer by 4 weeks or less after rehabilitation, with a mean of 3.5 weeks of missed sport days. Conclusions: Athletic trainers working with BU soccer players with hip pain focused the rehabilitation program on gluteal strengthening, functional stability exercises, proprioceptive control and general core strengthening in addition to the standard focus of improving deficits in range of motion, hip mobility and soft tissue mobilization. This protocol reduced time spent not playing soccer in BU athletes when compared to conventional rehabilitation. Significance of Findings: A holistic approach in the rehabilitation of hip injuries in collegiate division I soccer athletes reduces time spent not playing by 2-3 weeks. The return to play protocol and rehabilitation techniques currently being performed at Boston University for hip injuries in soccer players should be used a model protocol for other institutions with similar injuries Notes: DB - Embase UI - 71915175 IN - (Casta, Walusz) Boston University, Boston, MA, United States LG - English PT - Journal: Conference Abstract EM - 201526 DD - 20150618

(92) Chandrasekaran S, Vemula SP, Martin TJ, Suarez-Ahedo C, Lodhia P, Domb BG. Arthroscopic Technique of Capsular Plication for the Treatment of Hip Instability. Arthroscopy Techniques 4 (2) ()(pp e163-e167), 2015 Date of Publication: 01 Apr 2015 2015;(2):e163-e167. Ref ID: 172 Abstract: Atraumatic instability or microinstability of the hip is a recognized cause of groin pain and hip instability. Risk factors include female sex, ligamentous laxity, and borderline dysplasia. Arthroscopically, the joint may distract easily, and there may be associated ligamentum teres tears and laxity of the capsule on manual probing. The use of arthroscopic capsular plication in this cohort of patients has shown good to excellent results. Biomechanically, a capsular plication aims to create an imbrication and inferior shift of the capsule to augment the screw-home mechanism of the capsuloligamentous structures and thereby improve stability in extension and external rotation. The purpose of this article is to detail the step-by-step surgical technique of arthroscopic capsular plication, in addition to the indications, pearls, and pitfalls of the technique Notes: DB - Embase UI - 2015915517 IN - (Chandrasekaran, Vemula, Martin, Suarez-Ahedo, Lodhia, Domb) American Hip Institute, Westmont, IL, United States (Domb) Hinsdale Orthopaedics, Westmont, IL, United States CP - Netherlands LG - English PT - Journal: Article EM - 201524 DD - 20150604

(93) Charbonnier C, Magnenat-Thalmann N, Becker CD, Hoffmeyer P, Menetrey J. An integrated platform for hip joint osteoarthritis analysis: design, implementation and results. Int J Comput Assist Radiol Surg 2010; 5(4):351-358. Ref ID: 690 Abstract: PURPOSE: We present a software designed to improve hip joint osteoarthritis (OA) understanding using 3D anatomical models, magnetic resonance imaging (MRI) and motion capture. METHODS: In addition to a standard static clinical evaluation (anamnesis, medical images examination), the software provides a dynamic assessment of the hip joint. The operator can compute automatically and in real-time the hip joint kinematics from optical motion capture data. From the estimated motion, the software allows for the calculation of the active range of motion, the congruency and the center of rotation of the hip joint and the detection and localization of the femoroacetabular impingement region. All these measurements cannot be performed clinically. Moreover, to improve the subjective reading of medical images, the software provides a set of 3D measurement tools based on MRI and 3D anatomical models to assist and improve the analysis of hip morphological abnormalities. Finally, the software is driven by a medical ontology to support data storage, processing and analysis. RESULTS: We performed an in vivo assessment of the software in a clinical study conducted with 30 professional ballet dancers, a population who are at high risk of developing OA. We studied the causes of OA in this selected population. Our results show that extreme motion exposes the morphologically "normal" dancer's hip to recurrent superior or posterosuperior FAI and to joint subluxation. CONCLUSION: Our new hip software includes all the required materials and knowledge (images data, 3D models, motion, morphological measurements, etc.) to improve orthopedists' performances in hip joint OA analysis Notes: DA - 20100610 IS - 1861-6429 (Electronic) IS - 1861-6410 (Linking) LA - eng PT - Journal Article PT - Research Support, Non-U.S. Gov't SB - IM

(94) Chen A, Youderian A, Watkins S, Gourineni P. Arthroscopic femoral neck osteoplasty in slipped capital femoral epiphysis. Arthroscopy - Journal of Arthroscopic and Related Surgery 30 (10) ()(pp 1229-1234), 2014 Date of Publication: 2014 2014;(10):1229-1234. Ref ID: 194 Abstract: Purpose: To investigate the outcomes of arthroscopic femoral neck osteoplasty in patients with slipped capital femoral epiphysis (SCFE)erelated impingement. Methods: We retrospectively reviewed 37 consecutive patients (40 hips; 19 male and 18 female patients; age range, 10 to 19 years) with SCFE who underwent hip arthroscopy for femoral neck osteoplasty over a 4-year period. Six hips were excluded because of the severity of the slip or conversion to an open procedure. The preoperative and postoperative slip angle, alpha angle, and internal rotation in flexion were compared. Patients were evaluated for pain, functional limitations, and obligatory external rotation deformity (OERD) at each followup visit. The mean follow-up period was 22 months (range, 12 to 56 months). Results: We analyzed the results of 34 hips. Adequate distraction could not be obtained initially in 7 hips. The labral and acetabular cartilage damage appeared to be from crushing and abrasion from the bony prominence of the neck. The goals of complete pain relief and correction of OERD were achieved in 88% of the hips. OERD and pain persisted in 2 hips, and 2 patients had residual pain despite good motion. There was a statistically significant improvement in alpha angle (from 88.22degree and 56.91degree, P < .0001) and internal rotation in flexion (from -21.53degree to 10.28degree, P < .0001) with intervention. Conclusions: Arthroscopic femoral neck osteoplasty is effective in decreasing pain, the alpha angle, and OERD in mild to moderate SCFE. Morbid obesity, scarring from previous surgery, and the presence of screws in the anterior neck presented challenges to the arthroscopic technique. Level of Evidence: Level IV, therapeutic case series Notes: DB - Embase UI - 2014727817 IN - (Chen) Department of Orthopaedic Surgery, University of Illinois Medical Center, Chicago, United States (Youderian) Illinois Bone and Joint Institute, Morton Grove, United States (Watkins, Gourineni) Division of Pediatric Orthopaedics, Advocate Children's Hospital, 3420 Adams Road, Oak Brook, IL 60523m, United States CP - United States LG - English PT - Journal: Article EM - 201511 DD - 20150311

(95) Chen M-C, Yang S-H, Yao T-K, Chong P-N, Chen S-H. Bilateral hip pain caused by adductor pyomyositis as the initial presentation of chronic myeloid leukemia in a 17-year-old child. Pediatrics and Neonatology 52 (6) ()(pp 353-357), 2011 Date of Publication: December 2011 2011;(6):353-357. Ref ID: 384 Abstract: Pyomyositis is a pyogenic muscular tissue infection mainly occurring in immunocompromised patients. Chronic myeloid leukemia (CML) accounts for only 2-3% of cases of childhood leukemia. Herein, we report on a 17-year-old male with bilateral hip pain caused by adductor pyomyositis before beginning the treatment course of CML. CML was diagnosed by bone marrow chromosome study and was treated initially with imatinib but switched to hydroxyurea 5 days later because of poor cytoreduction response. Subsequently, white blood cell counts decreased gradually; however, the hyperleukocytosis condition resolved very slowly again until we switched back to imatinib use on the 40<sup>th</sup> day of hospitalization. Pyomyositis was diagnosed by magnetic resonance imaging. Oxacillin was administered to cover Staphylococcus aureus, the most common pathogen of pyomyositis. Bilateral hip pain improved within 72 hours after antibiotic usage, but follow-up magnetic resonance imaging after 15 days of treatment revealed well-defined abscess and osteomyelitis of both femoral heads. Abscess incision and drainage were performed, and cultures of the drained pus grew no microorganisms. The patient completed 5 weeks of oxacillin treatment after the operation and recovered with a full range of motion of both hips. There was no residual disability. This is the first report of bilateral hip pain caused by pyomyositis as the initial presentation of CML. Pyomyositis needs to be considered in the differential diagnosis of hip pain in pediatric patients. Â© 2011, Taiwan Pediatric Association. Published by Elsevier Taiwan LLC. All rights reserved Notes: DB - Embase UI - 2011706044 IN - (Chen, Yang, Chen) Department of Pediatrics, Buddhist Tzu Chi General Hospital, No. 707, Chung Yang Road, Hualien 970, Taiwan (Republic of China) (Yao) Department of Orthopedic Surgery, Buddhist Tzu Chi General Hospital, Hualien, Taiwan (Republic of China) (Chong) Department of Medical Imaging, Buddhist Tzu Chi General Hospital, Hualien, Taiwan (Republic of China) (Chen) Department of Medicine, College of Medicine, Tzu-Chi University, Hualien, Taiwan (Republic of China) CP - Singapore LG - English PT - Journal: Article EM - 201201 DD - 20120102

(96) Chiron P, Espie A, Reina N, Cavaignac E, Molinier F, Laffosse JM. Surgery for femoroacetabular impingement using a minimally invasive anterolateral approach: analysis of 118 cases at 2.2-year follow-up. Orthop Traumatol Surg Res 2012; 98(1):30-38. Ref ID: 646 Abstract: INTRODUCTION: Treatment of femoroacetabular impingement (FAI) has progressed over time from using long incisions and dislocation to using arthroscopic surgery. Minimally invasive treatment has rarely been evaluated and a minimally invasive, anterolateral approach has not been used up to now for this indication. A prospective, on-going study was performed to evaluate surgical treatment of FAI with a minimally invasive, anterolateral approach. HYPOTHESIS: Femoral neck, acetabulum and labrum abnormalities can be corrected without significant morbidity using a minimally invasive, anterolateral approach without dislocation. PATIENTS AND METHODS: Treatment of 120 FAI cases (108 patients, 16 women, 92 men, 12 bilateral cases during one surgical session), average age: 34 years (18.9-63.5 years), was done prospectively and in an uninterrupted series. Two cases were lost to follow-up; 106 patients (118 FAI cases) were evaluated with a follow-up of at least 1 year. Assessments consisted of the Non-Arthritic Hip Score (NAHS), WOMAC, measurement of internal rotation with 90 degrees flexion and the Notzli alpha angle on an A/P radiograph in 45 degrees of flexion, 45 degrees abduction and 30 degrees external rotation. RESULTS: Blood loss averaged 1.2g/dl (range 0.5 to 2.7g/dl) and the average operative time was 44.9 minutes (range 30 to 65). With an average follow-up of 2.2 years (range 12 to 54 months), the NAHS changed by 32.5 points (P<0.0001), internal rotation by 19.0 degrees (P<0.0001) and the alpha angle by -24.9 degrees (P<0.0001). Eight surgical revisions were required (6.8%) (four haematomas, two capsular debridement, two additional procedures on the acetabulum) and these had a good outcome; there were no nerve-related or infection-related complications. Four failures (3.5%) were revised by arthroplasty (two patients experienced residual pain and two patients rapidly progressed to osteoarthritis). Eighteen cases progressed by only one Tonnis stage. Brooker stage II and III ossification were observed in 12 cases (10.2%) but these did not affect the functional score and range of motion improvement. DISCUSSION: This approach, which can be learned and performed quickly, does not require any specific materials and yields a reliable surgical procedure without major complications. This short-term study, where the central cartilaginous compartment was not explored and the labrum was not sutured, comprised a consecutive, non-selected series of patients (independent of age, weight, osteoarthritis stage) and had encouraging results. LEVEL OF EVIDENCE: Level III, prospective study, no control group Notes: DA - 20120210 IS - 1877-0568 (Electronic) IS - 1877-0568 (Linking) LA - eng PT - Comparative Study PT - Journal Article SB - IM

(97) Chomiak J, Dungl P, Ostadal M, Burian M. Results of treatment of severe grade of scfe. HIP International Conference: 10th Congress of the European Hip Society, EHS 2012 Milan Italy Conference Start: 20120920 Conference End: 20120922 Conference Publication: (var pagings) 22 (4) ()(pp 425-426), 2012 Date of Publication: July-August 2012 2012;(var.pagings):425-426. Ref ID: 160 Abstract: Purpose: To evaluate the results of treatment of acute and chronic grade III slips of slipped capital femoral epiphysis. Material and Methods: In period 1996-2011, 27 patients (19 boys, 8 girls, age 10-16) were treated in our institution for severe slips (over 60 degrees according to Southwick measurement). Three patients were treated for acute slip; two patients for acute on chronic slip and chronic stable slips prevailed (19 patients). One patient was treated for severe bilateral slip. The surgical procedures were: modified Dunn procedure in 14 patients, intertrochanteric osteotomy in 8 patients (9 hips), closed reduction and transphyseal fixation in 3 patients for acute slips, epiphyseodesis in situ in one patient. Contralateral epiphyseodesis was used in majority of immature patients. Results: The average correction of angle were calculated and clinical results were evaluated according to reduction of ROM, shortening of extremity and limitations of activities as follows: excellent, very good, satisfactory, unsatisfactory. In subgroup of subcapital osteotomy, the average reductions of slips in anteroposterior/lateral views were 20/59 degrees, and clinical results were excellent in 11 hips, satisfactory in 2 patients due to the segmental AVN and unsatisfactory in one patient due to the complete AVN. In group of intertrochaneric osteotomies (9 hips), the average reductions of slips in anteroposterior/lateral views were 30/40 degrees, and clinical results were excellent: 1 hip, very good: 5 hips, satisfactory in 3 hips due to the segmental necrosis of the femoral head. In subgroup of acute slips, the average reductions of slips in anteroposterior/ lateral views were 40/30 degrees, and clinical results were excellent: 2 hips, unsatisfactory in 1 hip due to the AVN. In one patient with in situ fixation, the clinical result was satisfactory. Discussion and Conclusion: Severe slips in SCFE represent a serious therapeutic problem. In acute severe slips, great risk of AVN exists due to the slip, therefore urgent reduction and decompression (joint aspiration) are necessary. In chronic slips, subcapital osteotomy and realignment of epiphysis offer the most reliable results. However it represents demanding surgery with some risk of AVN and should be indicated before closing of proximal femoral physis. Surgical dislocation is not necessary in this procedure according to our experience. Intertrochanteric osteotomy is safe and efficient solution for slips till 70 degrees in immature hips, where some remodelling of neck-head junction is expected in order to avoid femoroacetabular impingement and early osteoarthritis. In situ fixation of epiphysis can be used only exceptionally in unsatisfactory health condition of patients from same reasons Notes: DB - Embase UI - 71960103 IN - (Chomiak, Dungl, Ostadal, Burian) Department of Orthopaedics, 1st Medical Faculty Charles University, Prague, Czech Republic LG - English PT - Journal: Conference Abstract EM - 201532 DD - 20150728

(98) Chongkrairatanakul N, Bauman J, Hesse K. We can fix the hip but nothing else. Journal of the American Geriatrics Society Conference: 2011 Annual Scientific Meeting of the American Geriatrics Society National Harbor, MD United States Conference Start: 20110511 Conference End: 20110514 Conference Publication: (var pagings) 59 ()( 2011;(var.pagings):S20. Ref ID: 321 Abstract: Introduction: No professional guidelines exist to declare a clinical situation "futile". When an aggressive surgery cannot realistically meet patient's therapeutic goals or quality of life, it is often helpful to listen to a second opinion from medical peers. We demonstrated a poor clinical outcome and avoidable suffering in a frail older patient after a hip arthroplasty. Case: A 79 y/o home-bound, mobility-impaired man was admitted for a fall and hip fracture. Past history was significant for CAD, AAA, stroke and failure to thrive with 50 lbs weight loss in the past 2 years. He was socially isolated and had limited medical care despite multiple co-morbidities. He had developed resting angina requiring daily TNG for relief weeks prior to admission. On exam, he was emaciated but alert and oriented with unremarkable vitals. His exam revealed multiple ecchymosis, apical systolic murmur, tenderness at the left hip with limited ROM and a 5 cm pulsatile abdominal mass with bruit. Laboratory results were remarkable for anemia (Hct 19.8%), thrombocytopenia (platelet 60 K), coagulopathy (PT 21.8) EKG with inferior Q wave and elevated cardiac biomarkers (troponin I 0.24, CK 41). Abdominal CT revealed an enlarged AAA 5.6 x 6.5 cm with extensive intramural thrombus. He was evaluated by multiple consultation services including Hematology, Pain, Medicine, Cardiology, Palliative Care and Geriatrics. He was deemed very high risk for a surgical procedure. Nonetheless, a hip replacement was performed. After 18 days of hospitalization, he was sent to SNF and did poorly. Five days later, he was readmitted for severe anemia and failure to thrive. It was less than a month after the operation when he decided to be in hospice care and spent the rest of his time at nursing home. Discussion: Physicians are programmed to "fix things" when possible. This philosophy is common not only in surgical situations but also in medicine. However, an effective multidisciplinary discussion with involved specialists should be considered with the goal to improve patient's quality of life. While patient survival may be considered a measure for success, enhanced quality of life is the real desirable outcome for some elderly patients. It is imperative to shift the traditional paradigm for successful outcome from quantitative to qualitative measures. In the process of surgical decision making, the question to ask should always be, "Is this appropriate care for the patient?'' Notes: DB - Embase UI - 70989684 IN - (Chongkrairatanakul, Bauman, Hesse) Geriatrics Medicine Unit, Department of Medicine, Massachusetts General Hospital, Boston, MA, United States LG - English PT - Journal: Conference Abstract EM - 201309 DD - 20130219

(99) Chopra V, Rohde J. Saved by the hip. Journal of Hospital Medicine Conference: 2010 Annual Meeting of the Society of Hospital Medicine, SHM 2010 Washington, DC United States Conference Start: 20100408 Conference End: 20100411 Conference Publication: (var pagings) 5 ()(pp 125-126), 2010 D 2010;(var.pagings):125-126. Ref ID: 209 Abstract: Case Presentation: A 78-year-old white male with well-controlled hypertension, type 2 diabetes. osteoarthritis, and gout presented to our preoperative clinic in anticipation of undergoing left hip arthroplasty. The patient had experienced left hip and back pain for 2 years that had become refractory to medical therapy. On clinical exam, the left hip was irritable to flexion, extension and internal rotation. There was mild tenderness over the greater trochanter. No abnormal chest, cardiac, neurological, or abdominal findings were noted. The patient's exam and Revised Cardiac Risk Index indicated a low risk for cardiac events (RCRI Zero, absolute risk = 0.6%). However, our perioperative consultant decided to review all imaging findings prior to proceeding. Routine x-ray (Fig. 1, top) of the left hip performed earlier (read pending) confirmed osteoarthritis but also showed what appeared to be a large vascular calcification in the tower abdomen. An urgent CAT scan was ordered, (Fig. 1, A-D, inset) confirming a large infrarenal abdominal aortic aneurysm measuring 9 cm in maximal diameter. The patient's hip surgery was cancelled and he was immediately started on statin and beta-blocker therapy. Given the size of his aneurysm, he was urgently referred to vascular surgery for a same-day evaluation. Discussion: Perioperative evaluation frequently involves a template, a "cookbook" approach usually inclusive of the estimation and amelioration of cardiac risk (via RCRI), evaluation of functional and physical status, medical reconciliation, and recommendations on stress dose steroids or DVT prophylaxis. Our patient presented with what appeared to be a straightforward story without clinical findings of concern. It was only when "routine" x-rays of the hip were reviewed that the imminent danger of a large aortic aneurysm was discovered. Our case thus highlights the often unspoken, yet crucial role of the perioperative consultant in reviewing evaluating and detecting abnormal disease via clinical, laboratory or imaging modalities that directly impacts operative risk. A through physical examination and a review of all testing is the foundation of perioperative risk evaluation. A simple "templated" algorithm may have led to our patient undergoing operative intervention with the hemodynamic stress of surgery (sans beta-blockers or statin treatment) potentially leading to a catastrophic outcome. Conclusions: Our patient underwent emergent endovascular repair of his large abdominal aortic aneurysm. His postoperative course was uncomplicated. He continues on lifelong statin and beta-blocker therapy. He hopes to undergo hip replacement in the near future but vows to return to our clinic for perioperative evaluation prior to doing so! Notes: DB - Embase UI - 71753319 IN - (Chopra, Rohde) University of Michigan Health System, Ann Arbor, MI, United States LG - English PT - Journal: Conference Abstract EM - 201506 DD - 20150115

(100) Choy WS, Kim KJ, Lee SK, Bae KW, Hwang YS, Park CK. Ceramic-on-ceramic total hip arthroplasty: minimum of six-year follow-up study. Clin Orthop Surg 2013; 5(3):174-179. Ref ID: 600 Abstract: BACKGROUND: This study examines the clinical and radiologic results of ceramic-on-ceramic total hip arthroplasties with regard to wear, osteolysis, and fracture of the ceramic after a minimum follow-up of six years. METHODS: We evaluated the results of a consecutive series of 148 primary ceramic-on-ceramic total hip arthroplasties that had been performed between May 2001 and October 2005 in 142 patients. The mean age was 57.2 years (range, 23 to 81 years). The mean follow-up period was 7.8 years (range, 6.1 to 10.1 years). Preoperative diagnosis was avascular necrosis in 77 hips (52%), degenerative arthritis in 36 hips (24.3%), femur neck fracture in 18 hips (12.2%), rheumatoid arthritis in 15 hips (10.1%), and septic hip sequelae in 2 hips (1.4%). Clinical results were evaluated with the Harris hip score, and the presence of postoperative groin or thigh pain. Radiologic analysis was done with special attention in terms of wear, periprosthetic osteolysis, and ceramic failures. RESULTS: The mean Harris hip score improved from 58.3 (range, 10 to 73) to 92.5 (range, 79 to 100) on the latest follow-up evaluation. At final follow-up, groin pain was found in 4 hips (2.7%), and thigh pain was found in 6 hips (4.1%). Radiologically, all femoral stems demonstrated stable fixations without loosening. Radiolucent lines were observed around the stem in 25 hips (16.9%), and around the cup in 4 hips (2.7%). Endosteal new bone formation was observed around the stem in 95 hips (64.2%) and around the cup in 88 hips (59.5%). No osteolysis was observed around the stem and cup. There were 2 hips (1.4%) of inclination changes of acetabular cup, 2 hips (1.4%) of hip dislocation, 1 hip (0.7%) of ceramic head fracture, and 1 hip (0.7%) of squeaking. The Kaplan-Meier survival rate of the prostheses was 98.1% at postoperative 7.8 years. CONCLUSIONS: The ceramic-on-ceramic total hip arthroplasty produced excellent clinical results and implant survival rates with no detectable osteolysis on a minimum six-year follow-up study. The ceramic-on-ceramic couplings could be a reasonable option of primary total hip arthroplasty for variable indications Notes: DA - 20130906 IS - 2005-4408 (Electronic) IS - 2005-291X (Linking) LA - eng PT - Journal Article RN - 0 (Ceramics) SB - IM

(101) Cibulka MT, Woehrle J. Conservative treatment options for osteoarthritis of the hip. Topics in Geriatric Rehabilitation 29 (4) ()(pp 227-238), 2013 Date of Publication: October-December 2013 2013;(4):227-238. Ref ID: 272 Abstract: Osteoarthritis (OA) of the hip is a common musculoskeletal problem. Often, hip pain begins as femoroacetabular impingement (FAI) that later develops into hip OA. Early symptoms of FAI include groin or greater trochanter pain, asymmetrical hip rotation, limited hip flexion, weakness of the hip flexors and abductor muscles, and the presence of pelvic obliquity. Later, symptoms and signs of clinical hip OA appear including stiffness in the hip lasting less than 1 hour, greater limitation of hip motions in all 3 body planes, increased weakness of most of the surrounding hip muscles, and eventually gait deviations. The purpose of this article was to describe the clinical diagnosis of both FAI and moderate hip OA in an attempt to start early conservative management in a patient who if not treated will likely develop hip OA. We emphasize that only by early recognition of FAI or of moderate hip OA will a conservative treatment program have potential for success. The conservative treatment of late hip OA is often ineffective, especially once the hip joint develops significant joint narrowing and other radiologic changes occur. Copyright Â© 2013 Lippincott Williams & Wilkins Notes: DB - Embase UI - 2013706422 IN - (Cibulka) Physical Therapy Program, Maryville University, 650 Maryville University Dr, St Louis, MO 63141, United States (Woehrle) Physical Therapy Program, Midwestern University, Glendale, AZ, United States CP - United States LG - English PT - Journal: Article EM - 201347 DD - 20131119

(102) Cinotti G, Lucioli N, Malagoli A, Calderoli C, Cassese F. Do large femoral heads reduce the risks of impingement in total hip arthroplasty with optimal and non-optimal cup positioning? International Orthopaedics 35 (3) ()(pp 317-323), 2011 Date of Publication: March 2011 2011;(3):317-323. Ref ID: 404 Abstract: The purpose of this study was to assess whether large femoral heads (36-38 mm) improve the range of motion in total hip arthroplasty compared to standard (28-32 mm) femoral heads in the presence of optimal and non-optimal cup positioning. A mathematical model of the hip joint was generated by using a laser scan of a dried cadaveric hip. The range of motion was assessed with a cup inclination and anteversion of reference and with non-optimal cup positions. Large femoral heads increased the range of motion, compared to the 28-mm femoral head, in the presence of a hip prosthesis correctly implanted and even more so in the presence of non-optimal cup positioning. However, with respect to the 32-mm femoral head, large femoral heads showed limited benefits both in the presence of optimal and non-optimal cup positioning. Â© Springer-Verlag 2010 Notes: DB - Embase UI - 2011266998 IN - (Cinotti, Lucioli) Orthopaedic Department, University la Sapienza, Rome, Italy (Malagoli, Calderoli, Cassese) DTM Technologies, Modena, Italy CP - Germany LG - English PT - Journal: Article EM - 201100 DD - 20110615

(103) Clarke IC, Lazennec J-Y, Brusson A, Savisaar C, Bowsher JG, Burgett M et al. Risk of impingement and third-body abrasion with 28-mm metal-on-metal bearings. Clinical Orthopaedics and Related Research 472 (2) ()(pp 497-508), 2014 Date of Publication: February 2014 2014;(2):497-508. Ref ID: 260 Abstract: Background: Concerns have been raised about the sequelae of metal-on-metal (MoM) bearings in total hip arthroplasty (THA). However, retrieval studies, which offer the best insight into the clinically relevant mechanisms of MoM wear, have followed predictable trends to date such as indicting cobalt-chromium (CoCr) metallurgy, cup design, high conformity between the head and cup, "steep cups," "microseparation," and "edge wear." Questions/purposes: We wished to evaluate a set of retrieved 28-mm MoM THA for signs of (1) cup-to-stem impingement; (2) normal wear pattern and concomitant stripe damage on femoral heads that would signify adverse wear mechanics; and (3) well-defined evidence of third-body scratches on bearings that would indicate large abrasive particles had circulated the joint space. Methods: Ten 28-mm MOM retrievals were selected on the basis that femoral stems were included. Revision surgeries at 3 to 8 years were for pain, osteolysis, and cup loosening. CoCr stems and the MoM bearings were produced by one vendor and Ti6Al4V stems by a second vendor. All but two cases had been fixed with bone cement. We looked for patterns of normal wear and impingement signs on femoral necks and cup rims. We looked for adverse wear defined as stripe damage that was visually apparent on each bearing. Wear patterns were examined microscopically to determine the nature of abrasions and signs of metal transfer. Graphical models recreated femoral neck and cup designs to precisely correlate impingement sites on femoral necks to cup positions and head stripe patterns. Results: The evidence revealed that all CoCr cup liners had impinged on either anterior or posterior facets of femoral necks. Liner impingement at the most proximal neck notch occurred with the head well located and impingement at the distal notch occurred with the head rotated 5 mm out of the cup. The hip gained 20 motion by such a subluxation maneuver with this THA design. All heads had stripe wear, the basal and polar stripes coinciding with cup impingement sites. Analysis of stripe damage revealed 40 to 100-mum wide scratches created by large particles ploughing across bearing surfaces. The association of stripe wear with evidence of neck notching implicated impingement as the root cause, the outcome being the aggressive third-body wear. Conclusions: We found consistent evidence of impingement, abnormal stripe damage, and evidence of third-body abrasive wear in a small sample of one type of 28-mm MoM design. Impingement models demonstrated that 28-mm heads could lever 20 out of the liners. Although other studies continue to show good success with 28-mm MoM bearings, their use has been discontinued at La Pitie Hospital. Level of Evidence: Level IV, therapeutic study. See Guidelines for Authors for a complete description of levels of evidence. Â© 2013 The Association of Bone and Joint Surgeons Notes: DB - Embase UI - 2014078589 IN - (Clarke) Department of Orthopaedics, Loma Linda University, Loma Linda, CA, United States (Clarke, Burgett) DARF Center, 900E Washington Street #200, Colton, CA 92324, United States (Lazennec, Brusson) Department of Orthopaedics, La Pitie Hospital, UPMC University, Paris, France (Savisaar, Bowsher) FDA, Silver Spring, MD, United States (Donaldson) Empire Orthopedics, Colton, CA, United States CP - United States LG - English PT - Journal: Conference Paper EM - 201407 DD - 20140212

(104) Clohisy JC, Knaus ER, Hunt DM, Lesher JM, Harris-Hayes M, Prather H. Clinical presentation of patients with symptomatic anterior hip impingement. Clin Orthop Relat Res 2009; 467(3):638-644. Ref ID: 713 Abstract: Femoroacetabular impingement (FAI) is considered a cause of labrochondral disease and secondary osteoarthritis. Nevertheless, the clinical syndrome associated with FAI is not fully characterized. We determined the clinical history, functional status, activity status, and physical examination findings that characterize FAI. We prospectively evaluated 51 patients (52 hips) with symptomatic FAI. Evaluation of the clinical history, physical exam, and previous treatments was performed. Patients completed demographic and validated hip questionnaires (Baecke et al., SF-12, Modified Harris hip, and UCLA activity score). The average patient age was 35 years and 57% were male. Symptom onset was commonly insidious (65%) and activity-related. Pain occurred predominantly in the groin (83%). The mean time from symptom onset to definitive diagnosis was 3.1 years. Patients were evaluated by an average 4.2 healthcare providers prior to diagnosis and inaccurate diagnoses were common. Thirteen percent had unsuccessful surgery at another anatomic site. On exam, 88% of the hips were painful with the anterior impingement test. Hip flexion and internal rotation in flexion were limited to an average 97 degrees and 9 degrees, respectively. The patients were relatively active, yet demonstrated restrictions of function and overall health. These data may facilitate diagnosis of this disorder Notes: DA - 20090204 IS - 1528-1132 (Electronic) IS - 0009-921X (Linking) LA - eng PT - Journal Article PT - Research Support, N.I.H., Extramural SB - AIM SB - IM

(105) Clohisy JC, Carlisle JC, Trousdale R, Kim YJ, Beaule PE, Morgan P et al. Radiographic evaluation of the hip has limited reliability. Clin Orthop Relat Res 2009; 467(3):666-675. Ref ID: 720 Abstract: Radiographic evaluation provides essential information regarding the diagnosis and treatment of musculoskeletal disorders. We evaluated the ability of hip specialists to reliably identify important radiographic features and to make a diagnosis based on plain radiographs alone. Five hip specialists and one fellow performed a blinded radiographic review of 25 control hips, 25 hips with developmental dysplasia (DDH), and 27 with femoroacetabular impingement (FAI). On two separate occasions, readers assessed acetabular version, inclination and depth, position of the femoral head center, head sphericity, head-neck offset, Tonnis grade, and joint congruency. Observers made a diagnosis categorizing each hip as normal, dysplastic, FAI, or combined DDH and FAI (features of both). Reliability was determined using Cohen's kappa coefficient. Intraobserver values were highest for acetabular inclination (kappa = 0.72) and determination of femoral head center position (kappa = 0.77). Interobserver reliability values were highest for acetabular inclination (kappa = 0.61) and Tonnis osteoarthritis grade (kappa = 0.59). All other measurements, including diagnosis, had kappa values less than 0.55. We concluded many of the standard radiographic parameters used to diagnose DDH and/or FAI are not reproducible. Accordingly, a more clear set of definitions and measurements must be developed to allow for more reliable diagnosis of early hip disease Notes: DA - 20090204 IS - 1528-1132 (Electronic) IS - 0009-921X (Linking) LA - eng PT - Evaluation Studies PT - Journal Article PT - Research Support, N.I.H., Extramural SB - AIM SB - IM

(106) Clohisy JC, Nepple JJ, Ross JR, Pashos G, Schoenecker PL. Does Surgical Hip Dislocation and Periacetabular Osteotomy Improve Pain in Patients With Perthes-like Deformities and Acetabular Dysplasia? Clinical Orthopaedics and Related Research 473 (4) ()(pp 1370-1377), 2015 Date of Publication: 2015 2015;(4):1370-1377. Ref ID: 165 Abstract: Background: Patients with symptomatic residual Perthes-like deformities may present with a combination of structural abnormalities including a large aspheric femoral head, short and wide femoral neck, high greater trochanter, and acetabular dysplasia. Sometimes, the hip is further compromised by concurrent symptomatic femoroacetabular impingement (FAI) (proximal femoral deformities) and structural instability (acetabular dysplasia). Questions/purposes: We therefore sought to characterize (1) the intraoperative findings; (2) radiographic correction; and (3) early patient-reported outcomes, complications, and failures of treating complex Perthes-like hip deformities with combined surgical dislocation and periacetabular osteotomy (PAO). Methods: We performed 694 hip preservation procedures between November 2006 and August 2010. Of these, 46 had residual Perthes-like hip deformities, defined as proximal deformity consistent with residual Perthes and a history of Perthes disease or treatment of pediatric hip dysplasia. Of these, we report on 16 patients (16 hips) with residual Perthes-like hip deformities and associated acetabular dysplasia (structural instability, defined as radiographic evidence of acetabular dysplasia with intraoperative confirmation of instability). These 16 patients were treated with a combined surgical hip dislocation to comprehensively address intraarticular and extraarticular sources of FAI and PAO to address structural instability and were analyzed at a minimum 24-month followup (median, 40 months; range, 24-78 months). No patients in this series were lost to followup. Ten patients' hips had previous surgical treatment, including six with previous osteotomy. Operative findings were extracted from standardized prospectively collected intraoperative data collection forms. Radiographic correction was evaluated with established methods (lateral center-edge angle, anterior center-edge angle, acetabular inclination, center-to-trochanter distance) and clinical outcomes were measured with the modified Harris hip score (mHHS) as well as by prospectively recorded data on patient complications and followup. Results: Acetabular labrochondral abnormalities included labral hypertrophy in all hips and labral and/or articular cartilage lesions requiring treatment in 13 hips. Radiographic analysis demonstrated consistent radiographic correction. The median preoperative mHHS improved from 64 to 92 at a median followup of 40 months (p < 0.001). Fourteen patients (14 hips) had a good or excellent clinical result. Two patients (two hips) were classified as failures based on mHHS less than 70 (n = 1) or conversion to total hip arthroplasty (n = 1). Conclusions: Combined surgical hip dislocation and PAO provides major deformity correction in Perthes-like hip deformities with associated acetabular dysplasia. Early clinical results suggest this technique is safe and effective. Long-term studies are needed to determine if improved long-term outcomes are associated with comprehensive deformity correction. Level of Evidence: Level IV, therapeutic study Notes: DB - Embase UI - 2015665257 IN - (Clohisy, Nepple, Pashos, Schoenecker) Department of Orthopaedic Surgery, Washington University School of Medicine, 660 South Euclid Avenue, Campus Box 8233, St Louis, MO 63110, United States (Ross) University of Michigan, Ann Arbor, MI, United States CP - United States LG - English PT - Journal: Article EM - 201527 DD - 20150627

(107) Cohen SB, Huang R, Ciccotti MG, Dodson CC, Parvizi J. Treatment of femoroacetabular impingement in athletes using a mini-direct anterior approach. Am J Sports Med 2012; 40(7):1620-1627. Ref ID: 637 Abstract: BACKGROUND: Femoroacetabular impingement (FAI) is an increasingly common diagnosis in active patients with hip pain. Surgical options for FAI include arthroscopy, open surgical dislocation, or mini-direct anterior approaches. Arthroscopic and open treatments of FAI have been commonly performed and have had promising results in athletes. Hypothesis/ PURPOSE: We hypothesized that the mini-direct anterior approach would provide the advantages of a minimally invasive procedure and still allow adequate exposure of the hip joint to successfully treat FAI in an athletic population. The purpose of this study was to determine if a mini-open approach for the treatment of FAI in athletic patients would allow a return to preoperative activity. STUDY DESIGN: Case series; Level of evidence, 4. METHODS: A total of 234 patients (257 hips) with FAI were treated by a mini-open approach; 59 were athletic patients (66 hips) with a preoperative University of California, Los Angeles (UCLA) activity score of 7 or higher or Super Simple Hip (SUSHI) activity score of 70 or greater. Forty-four of the 59 athletic patients (47 hips) have reached 1-year minimum follow-up. No patients were lost to follow-up. The mini-open approach was performed through a 4-cm incision and modified Smith-Peterson approach with no muscle detachment. All patients were prospectively evaluated using the following outcome measures: preoperative and postoperative UCLA activity, Short-Form 36 Health Survey (SF-36), Western Ontario and McMaster Osteoarthritis Index (WOMAC), modified Harris Hip Score (HHS), and SUSHI scores. RESULTS: The average age at the time of surgery was 32 years (range, 17-60 years), with an average follow-up of 22 months. Labral changes-whether tear, detachment, or ossification-were present in all patients, and 84% had chondral lesions. The mean HHS improved from 55 preoperatively to 79 postoperatively (P < .001). The WOMAC scores also improved from 47.9 to 8.3 (P < .001). Mean SF-36 scores improved from 65 to 85 postoperatively (P < .001). The mean preoperative SUSHI general score was 31.1, pain score was 26.6, and limitation score was 28.9. The mean postoperative SUSHI general score was 53.6, pain score was 47.5, and limitation score was 51.6 (P < .001). There was minimal change from preinjury to postoperative UCLA (8.0 to 8.7, respectively; P = .07) or SUSHI activity scores (76.3 to 67.7, respectively; P = .048), indicating a reliable return to preinjury activity levels. Twenty-four of 44 patients (55%) reported a return to their specific preoperative sports. Nine patients (20%) developed meralgia paresthetica postoperatively, which resolved within 1 year. CONCLUSION: The mini-open approach for the treatment of FAI is a safe and effective procedure that allows surgical treatment of FAI in athletic patients and a successful return to high activity levels. The outcome of the mini-open approach for athletes may be comparable with open and arthroscopic treatment of FAI Notes: DA - 20120703 IS - 1552-3365 (Electronic) IS - 0363-5465 (Linking) LA - eng PT - Journal Article SB - IM

(108) Colbenson KM, Fitch RW. Back pain and its "red flags". Clinical Journal of Sport Medicine Conference: 23rd Annual Meeting of the American Medical Society for Sports Medicine New Orleans, LA United States Conference Start: 20140405 Conference End: 20140409 Conference Publication: (var pagings) 24 (2) ()(pp 2014;(var.pagings):e1-e2. Ref ID: 222 Abstract: History: A 33-year-old, healthy male presents with persistent and progressive lumbar back pain of 8 months duration. An avid runner, the patient first noted lumbar back pain, which was worse with exertion approximately 8 months ago. He saw 3 physicians to address this lumbar back pain. His workup included x-rays, an MRI, and a bone scan with no etiology determined. He underwent months of physical therapy, epidural steroid injections to L4-S1, and dry needling of his hip flexors with progression of his pain. On presentation, the patient described his pain as a dull ache to the lumbar spine. It was worse with exertion and associated with a sensation of muscle cramps that radiated into both hip flexors. His pain was not reproducible, but was present at rest. He denied parasthesias, weakness, or further radicular symptoms. He did describe some weight loss. No past medical history. Physical Examination: General: Well appearing. Abdominal: Non-tender, non-distended, no masses. Back: No tenderness to palpation of the spine or paraspinal muscles. Hip: Normal ROM without intra-articular pain. Lymph: Inguinal lymphadenopathy bilaterally. Lower extremities: 1+ edema extending to the groin. Neuro: 5/5 strength bilateral lower extremities. Normal sensation. Differential Diagnosis: Vascular: Deep vein thrombosis; Retroperitoneal vascular process; Portal vein thrombosis; Lymphdedema. Musculoskeletal: Spinal stenosis; Epidural, intradural, or vertebral metastases; Intervertebral disc herniation. Rheumatologic: Polymyalgia rheumatic; Ankylosing spondylitis; DISH. Infection: Potts Disease. Metabolic: Nephrotic syndrome; Myxedema; NSAID-induced edema. Tests & Results: Laboratory: Creatinine: 1.03; Electrolytes: Normal; LFT's: Normal; SedRate: 52; CRP: 82.7; CPK: 132. Imaging: CT abdomen/pelvis: Extensive expansile thrombus filling the entire inferior vena cava and distal venous system; Lower extremity ultrasound: Occlusive thrombus bilaterally extending from the femoral veins to the deep calf veins. Final/Working Diagnosis: Initial differential included: intravascular IVC neoplasm versus occlusive thrombus. Treatment: The patient was sent to the emergency department from clinic, and a vascular surgery and oncology consultation was placed. He was immediately started on a heparin drip and admitted to the hospital. A PET scan was performed with uptake noted in the IVC mass only. An operative excision and exploration showed significant retroperitoneal lymphadenopathy and a mural neoplasm of the IVC extending from the renal veins to the iliac bifurcation. An IVC resection and reconstruction was performed. Outcome: Pathology revealed the final diagnosis: high-grade spindle cell leiomyosarcoma. The patient had a successful post-operative course. He chose against adjuvant chemotherapy despite the high risk of metastasis or reoccurrence. Oncology and vascular surgery continue to follow the patient every 3 months for CT monitoring. The patient remains recurrence free and has even returned to running. He continues to experience cramping in his lower extremities with exertion that should resolve when appropriate collaterals develop. Return to Activity and Follow-Up: This case is a humbling reminder to never overlook the "red flags" of back pain. Physicians need to be able to recognize components to clinical exam and history that are inconsistent with routine mechanical back pain. This case highlights these specific criteria. 1. Progressive: Progressive pain despite adequate treatment; Progressive neurologic deficit. 2. Pain at rest: Non-mechanical back pain by clinical exam or clinical history. 3. Comorbidities: History of cancer, fever, weight loss, immunosuppression or IV drug use; Age >50; 4. Pain and a positive finding on clinical exam: Lymphadenopathy; Saddle anesthesia; Lower extremity swelling; Neurologic deficit; Cauda Equina; 5. Image the "entire back": Back pain can be referred pain from the abdomen, pelvis, or retroperitoneum Notes: DB - Embase UI - 71702959 IN - (Colbenson, Fitch) Vanderbilt University Medical Center, United States LG - English PT - Journal: Conference Abstract EM - 201450 DD - 20141204

(109) Compain C, Michou L, Orcel P, Hannouche D, Richette P. Septic arthritis of the hip with psoas abscess caused by Non-typhi Salmonella infection in an immunocompetent patient. Joint Bone Spine 2008; 75(1):67-69. Ref ID: 732 Abstract: Osteoarticular infections caused by Non-typhi Salmonella are exceptionally encountered. We report a case of a bacteriologically documented hip infection associated with a psoas abscess due to Non-typhi Salmonella. A 64-year-old immunocompetent male was admitted in our department for pain and motion range limitation in the right hip with fever. Non-typhi Salmonella was recovered in joint fluid obtained by needle aspiration. Antimicrobial chemotherapy combined with surgical intervention was necessary for eradication of the infection. Physicians should be aware of this rare manifestation of Non-typhi Salmonella infections in non-debilitated patients Notes: DA - 20080114 IS - 1778-7254 (Electronic) IS - 1297-319X (Linking) LA - eng PT - Case Reports PT - Journal Article RN - 0 (Anti-Bacterial Agents) SB - IM

(110) Cook C, Massa L, Harm-Ernandes I, Segneri R, Adcock J, Kennedy C et al. Interrater reliability and diagnostic accuracy of pelvic girdle pain classification. Journal of Manipulative & Physiological Therapeutics 2007; 30(4):252-258. Ref ID: 139 Abstract: OBJECTIVE: The purpose of this study was to measure the reliability of a classification system for pelvic girdle pain (PGP) and diagnostic accuracy of selected examination and clinical special findings for diagnosis of PGP. METHODS: The design involved a prospective epidemiological study of pregnancy-related PGP. Consecutive subjects were recruited and classified using criteria defined by previous studies. Two clinicians examined the subjects and classified each patient into 1 of 5 classification groups. Clinical examination and clinical special tests were performed on the patients with PGP. Statistical analysis involved interobserver agreement using a kappa statistic and sensitivity and specificity values for the examination and clinical special testing. RESULTS: Twenty-one subjects were included in the analyses. Aggregated percentage of agreement for the classification system was 84.6%. The Cohen kappa was 0.78 (CI, 0.64-0.92; P < .0001), which indicated substantial agreement during selection of the classification system. Most clinical examination and clinical special-test findings demonstrated low sensitivity and high specificity, whereas clusters of findings including the lunge, manual muscle testing of the hip (lower extremities), and passive range of motion of the hip demonstrated the strongest diagnostic value. CONCLUSION: Selected tests and measures are moderately discriminatory in diagnosing PGP. A classification system for diagnosing PGP demonstrates strong agreement and may be useful for clinicians Notes: ID - 106128766 IS - 4 CY - Philadelphia, Pennsylvania

(111) Cooper HJ, Della Valle CJ. Large diameter femoral heads: is bigger always better? Bone Joint J 2014; 96-B(11 Supple A):23-26. Ref ID: 553 Abstract: Dislocation remains among the most common complications of, and reasons for, revision of both primary and revision total hip replacements (THR). Hence, there is great interest in maximising stability to prevent this complication. Head size has been recognised to have a strong influence on the risk of dislocation post-operatively. As femoral head size increases, stability is augmented, secondary to an increase in impingement-free range of movement. Larger head sizes also greatly increase the 'jump distance' required for the head to dislocate in an appropriately positioned cup. Level-one studies support the use of larger diameter heads as they decrease the risk of dislocation following primary and revision THR. Highly cross-linked polyethylene has allowed us to increase femoral head size, without a marked increase in wear. However, the thin polyethylene liners necessary to accommodate larger heads may increase the risk of liner fracture and larger heads have also been implicated in causing soft-tissue impingement resulting in groin pain. Larger diameter heads also impart larger forces on the femoral trunnion, which may contribute to corrosion, metal release, and adverse local tissue reactions. Alternative large bearings including large ceramic heads and dual mobility bearings may mitigate some of these risks, and several of these devices have been used with clinical success Notes: DA - 20141108 IS - 2049-4408 (Electronic) LA - eng PT - Journal Article PT - Review SB - AIM SB - IM

(112) Cordier W, Tonnis D, Kalchschmidt K, Storch KJ, Katthagen BD. Long-term results after open reduction of developmental hip dislocation by an anterior approach lateral and medial of the iliopsoas muscle. J Pediatr Orthop B 2005; 14(2):79-87. Ref ID: 756 Abstract: The technique of and especially the approach to open reduction of developmental dislocation of the hip are still a matter of discussion. The anterior approach, first lateral and then medial to the iliopsoas muscle, was described by Tonnis in 1978. A follow-up investigation to adulthood has now been performed. Eighty-seven children (118 hips) out of 105 children (83%) who underwent open reduction of developmental dislocation of the hip before the age of 4 years were reinvestigated 10-21 years after the operation. An anterior approach first lateral, then medial to the iliopsoas muscle was chosen, because this offers the best access to the joint. Additional operations including transiliac osteotomy for acetabuloplasty, shortening osteotomy, and femoral osteotomies were performed as necessary. In 92 (78%) of the 118 hips studied the CE angle exceeded 25 degrees and in 98 hips (83%) the VCA angle exceeded 25 degrees. Critical CE angles between 20 and 25 degrees were found in 14% of the hips, and critical VCA angles in 4%. Residual dysplasia (<20 degrees) was found in 8 and 13% of the hips, respectively. Avascular necrosis according to Hirohashi was observed after operation in grade 1 in 5.9% and grade 2 in 1.7%. No necrosis was found following shortening osteotomy of the proximal femur. The anterior approach, first lateral, then medial to the iliopsoas muscle, offers an optimal access to the medial parts of the joint with control of reduction, protects the vasculature of the femoral neck, and allows simultaneous postero-lateral capsulorrhaphy and pelvic osteotomies Notes: DA - 20050210 IS - 1060-152X (Print) IS - 1060-152X (Linking) LA - eng PT - Comparative Study PT - Journal Article SB - IM

(113) Coulson S, Palacios T, Vitetta L. Perna canaliculus (Green-lipped mussel): Bioactive components and therapeutic evaluation for chronic health conditions. Progress in Drug Research 70 ()(pp 91-132), 2015 Date of Publication: 2015 2015;91-132. Ref ID: 155 Abstract: Perna canaliculus (Green-Lippped Mussel) is found only in New Zealand waters and is cultivated and manufactured for both the food and nutraceutical industry world-wide. P. canaliculus has traditionally been used as a therapeutic to treat various arthralgias in both humans and animals; however, clinical research reports provide conflicting results. Numerous in vitro studies have reported anti-inflammatory activity of the mussel under various conditions and also demonstrated a synergistic effect with pharmaceutical medications such as non-steroidal anti-inflammatory drugs (NSAIDs) with P. canaliculus protecting the gastrointestinal mucosal lining against such medications. It is proposed that the anti-inflammatory activity demonstrated by P. canaliculus is predominantly due to the lipid fraction, however, among the major classes of compounds found in mussel meat, proteins and peptides are the largest with isolates demonstrating various anti-microbial, anti-inflammatory, anti-oxidant, bioadhesive and anti-hypertensive activities. A review of the bioactive components, their function and therapeutic application is outlined in this chapter. Furthermore, we hypothesise and provide supportive evidence that the gastrointestinal microbiota play an important role in disease processes such as Rheumatoid arthritis and Osteoarthritis and also in the efficacy of P. canaliculus in chronic inflammatory conditions. The metabolic capacity of intestinal microbiota can modify bioactive food components altering the hosts' exposure to these components, potentially enhancing or diminishing their health effects. Understanding the interaction of the bioactive compounds in P. canaliculus with commensal and pathogenic bacteria may facilitate the development of novel interventions to control intestinal and extraintestinal inflammation Notes: DB - Embase UI - 2015247356 IN - (Coulson, Vitetta) Medlab Clinical Ltd, 66 McCauley Street, Alexandria, NSW, Australia (Coulson, Palacios, Vitetta) The University of Sydney, Sydney Medical School, Sydney, NSW, Australia CP - Switzerland LG - English PT - Book Series: Article EM - 201533 DD - 20150810

(114) Cross KM, Worrell TW. Effects of a static stretching program on the incidence of lower extremity musculotendinous strains. Journal of Athletic Training 1999; 34(1):11-14. Ref ID: 89 Abstract: Objective: Musculotendinous strains are among the most prevalent injuries for which health care professionals provide treatment and rehabilitation interventions. Flexibility has been identified as one of the primary etiologic factors associated with musculotendinous strains, but limited research exists on the effect of a preventive stretching program on musculotendinous strains. Therefore, the purpose of our study was to compare the number of musculotendinous strains for the hamstrings, quadriceps, hip adductors, and gastrocnemius-soleus muscle groups before and after the incorporation of a static stretching program for each muscle group. Design and Setting: We analyzed the incidence of musculotendinous strains among the players of a Division III collegiate football team between 1994 and 1995. All variables were consistent between the 2 seasons except for the incorporation of a lower extremity stretching program in 1995. Subjects: One hundred and ninety-five Division III college football players. Measurements: We calculated the number of musculotendinous strains that required a minimum absence of 1 day from practices or games in 1994 and 1995. Results: A chi square analysis revealed a significant reduction in the number of lower extremity musculotendinous strains in 1995 as opposed to 1994. Conclusions: Our statistical analysis indicates an association between the incorporation of a static stretching program and a decreased incidence of musculotendinous strains in Division III college football players Notes: ID - 107197915 IS - 1 CY - St. Louis, Missouri

(115) Cuckler JM, Moore KD, Estrada L. Outcome of hemiresurfacing in osteonecrosis of the femoral head. Clin Orthop Relat Res 2004;(429):146-150. Ref ID: 760 Abstract: Hemiresurfacing of the femoral head for treatment of osteonecrosis has been proposed as a reasonable alternative to total hip arthroplasty. The results of 59 patients with Ficat Stage III osteonecrosis done by a single surgeon are reviewed. At an average followup of 4.5 years, 16 patients were considered failures because of conversion to total hip arthroplasty or considerable groin pain requiring medication. Failure did not correlate with age, body mass index, preoperative length of symptoms, acetabular articular cartilage status at the time of surgery, or cause of the underlying disease. The only factor associated with failure was a lower preoperative Harris hip score. Conversion of the failed implants to total hip arthroplasty was straightforward, confirming the conservative nature of the procedure. However, pain relief and recovery after resurfacing are less reliable than that associated with total hip arthroplasty. This procedure may be appropriate for patients younger than 30 years, given the ease of conversion to THR if failure occurs. The patient should be counseled regarding expectations Notes: DA - 20041203 IS - 0009-921X (Print) IS - 0009-921X (Linking) LA - eng PT - Comparative Study PT - Journal Article SB - AIM SB - IM

(116) Cuckler JM. The Dislocated Total Hip: The Dreaded 3 AM Phone Call. Seminars in Arthroplasty 22 (2) ()(pp 98-99), 2011 Date of Publication: June 2011 2011;(2):98-99. Ref ID: 392 Abstract: This review discusses the causes and management of early and late dislocation after total hip arthroplasty. Results of various strategies for management are reviewed on the basis of current literature. Â© 2011 Elsevier Inc Notes: DB - Embase UI - 2011359995 IN - (Cuckler) Alabama Medical Consultants, Naples, FL, United States CP - United States LG - English PT - Journal: Article EM - 201100 DD - 20110718

(117) Currier LL, Froehlich PJ, Carow SD, McAndrew RK, Cliborne AV, Boyles RE et al. Development of a clinical prediction rule to identify patients with knee pain and clinical evidence of knee osteoarthritis who demonstrate a favorable short-term response to hip mobilization. Physical Therapy 87 (9) ()(pp 1106-1119), 2007 Date of Publication: September 2007 2007;(9):1106-1119. Ref ID: 484 Abstract: Background and Purpose: The primary purpose of this study was to develop a clinical prediction rule (CPR) for identifying patients with knee pain and clinical evidence of knee osteoarthritis (OA) with favorable short-term response to hip mobilizations. The secondary purpose was to determine the predictive validity of individual clinical tests for identifying these same patients. Subjects and Methods: Sixty subjects with knee OA, aged 51 to 79 years, completed self-report questionnaires, a clinical examination of the hip and knee, and functional tests and were treated with 4 hip mobilizations. Follow-up testing was completed 2 days later. The reference criterion for determining a favorable response was either (1) a decrease of at least 30% on composite Numerical Pain Rating Scale score obtained during functional tests or (2) a Global Rating of Change Scale score of at least 3. Results: The CPR developed in this study comprised 5 variables: (1) hip or groin pain or paresthesia, (2) anterior thigh pain, (3) passive knee flexion less than 122 degrees, (4) passive hip medial (internal) rotation less than 17 degrees, and (5) pain with hip distraction. Based on the pretest probability of success (68%), the presence of one variable had a positive likelihood ratio of 5.1 and increased the probability of a successful response to 92% at 48-hour follow-up. If 2 variables were present, the positive likelihood ratio was 12.9 and the probability of success increased to 97%. Discussion and Conclusion: The results suggest that the CPR developed in this study could improve clinicians' decision making and efficiency in examining and treating patients with knee OA. Â© 2007 American Physical Therapy Association Notes: DB - Embase UI - 2007585618 IN - (Currier) Malcolm Grow Medical Center, Andrews AFB, MD, United States (Froehlich) Womack Army Medical Center, Fort Bragg, NC, United States (Carow) Guthrie Medical Department, Fort Drum, NY, United States (McAndrew) Department of Physical Therapy, Bayne-Jones Army Community Hospital, Fort Polk, LA, United States (Cliborne) Brooke Army Medical Center, Fort Sam Houston, TX, United States (Currier, Froehlich, Carow, Boyles, Wainner) US Army-Baylor Doctoral Program in Physical Therapy, Fort Sam Houston, TX, United States (Mansfield) Musculoskeletal Radiology, Brooke Army Medical Center (Wainner) Texas State University, San Marcos, TX, United States CP - United States LG - English PT - Journal: Article EM - 200700 DD - 20071212

(118) Dachs R, Horn A, Koornhof H, De Jager L, Maqungo S, Roche S. Double pathology, sarcoidosis associated with multiple myeloma: A case report. Journal of Bone Oncology 3 (2) ()(pp 61-65), 2014 Date of Publication: 2014 2014;(2):61-65. Ref ID: 186 Abstract: The association of sarcoidosis with multiple myeloma is not well known. Including this case report, 12 cases of patients with both sarcoidosis and multiple myeloma have been reported in the literature. The skeletal lesions of both conditions have many clinical and radiological similarities, and unless clinicians are aware of the association and the possibility of dual pathologies, the diagnosis of multiple myeloma in patients known with sarcoidosis may be missed. We present a case of a patient known with longstanding sarcoidosis who was found to have multiple lesions on magnetic resonance imaging (MRI) involving the pelvis and both proximal femurs. Histological analysis revealed the presence of both non-necrotising granulomas consistent with sarcoidosis, and sheets of plasma cells consistent with a plasma cell neoplasm Notes: DB - Embase UI - 2014740232 IN - (Dachs, Horn, Maqungo, Roche) Department of Orthopaedic Surgery, University of Cape Town, Groote Schuur Hospital, Observatory, H49 Old Main Building, Cape Town 7925, South Africa (Koornhof) Division of Clinical Haematology, University of Cape Town, Cape Town, South Africa (De Jager) Division of Anatomical Pathology, University Of Cape Town, Cape Town, South Africa CP - Germany LG - English PT - Journal: Article EM - 201517 DD - 20150417

(119) Dahlquist M, Leisz M-C, Finkelstein M. The club-level road cyclist: Injury, pain, and performance. Clinical Journal of Sport Medicine 25 (2) ()(pp 88-94), 2015 Date of Publication: 10 Mar 2015 2015;(2):88-94. Ref ID: 190 Abstract: Objective: The aims of this study were to (1) examine riding habits of injured cyclists, (2) identify factors related to seeking medical treatment, (3) investigate performance of recreational road cyclists compared with established norms regarding strength and flexibility measures, and (4) propose cycling-specific injury risk factors. Design: Observational and prospective study. Setting: Cycling store and bicycle distribution company. Participants: Sixty-three experienced road cyclists. Assessment of Risk Factors: Initial data collection included a questionnaire. A 2-week training diary and 8 weekly follow-up injury questionnaires were also collected. Main Outcome Measures: Training habits and injury history, bike fit, flexibility, and isometric, dynamic, and plyometric strength measures. Results: Participants were likely to have an injury at baseline, and chronic pain was common. Cyclists trained for an equal quantity of time irrespective of experiencing pain. Injury severity in terms of pain level and participant age were factors in seeking medical care. Our participants performed poorly on our testing protocol compared with available norms. Flexibility, strength, and bike fit measures did not predict injury. Previous injury predicted prospective injury. The knee and lumbar region were most frequently injured. Conclusions: Cycling is a sport in which injury risk and prevention need to be further studied. Cyclists are frequently injured but continue to participate in cycling at volumes equal to their healthy peers. Clinical Relevance: This study outlines a clinically reproducible cyclist assessment and discusses behaviors common to the cycling patient Notes: DB - Embase UI - 2014743184 IN - (Dahlquist) Courage Kenny Sports and Physical Therapy Center, Minneapolis, MN, United States (Leisz) Courage Kenny Rehabilitation Institute, Minneapolis, MN, United States (Finkelstein) Courage Kenny Research Center, Minneapolis, MN, United States CP - United States LG - English PT - Journal: Article EM - 201513 DD - 20150318

(120) Dallinga JM, Benjaminse A, Lemmink KA. Which screening tools can predict injury to the lower extremities in team sports?: a systematic review. Sports Med 2012; 42(9):791-815. Ref ID: 629 Abstract: BACKGROUND: Injuries to lower extremities are common in team sports such as soccer, basketball, volleyball, football and field hockey. Considering personal grief, disabling consequences and high costs caused by injuries to lower extremities, the importance for the prevention of these injuries is evident. From this point of view it is important to know which screening tools can identify athletes who are at risk of injury to their lower extremities. OBJECTIVE: The aim of this article is to determine the predictive values of anthropometric and/or physical screening tests for injuries to the leg, anterior cruciate ligament (ACL), knee, hamstring, groin and ankle in team sports. METHODS: A systematic review was conducted in MEDLINE (1966 to September 2011), EMBASE (1989 to September 2011) and CINAHL (1982 to September 2011). Based on inclusion criteria defined a priori, titles, abstracts and full texts were analysed to find relevant studies. RESULTS: The analysis showed that different screening tools can be predictive for injuries to the knee, ACL, hamstring, groin and ankle. For injuries in general there is some support in the literature to suggest that general joint laxity is a predictive measure for leg injuries. The anterior right/left reach distance >4 cm and the composite reach distance <4.0% of limb length in girls measured with the star excursion balance test (SEBT) may predict leg injuries. Furthermore, an increasing age, a lower hamstring/quadriceps (H : Q) ratio and a decreased range of motion (ROM) of hip abduction may predict the occurrence of leg injuries. Hyperextension of the knee, side-to-side differences in anterior-posterior knee laxity and differences in knee abduction moment between both legs are suggested to be predictive tests for sustaining an ACL injury and height was a predictive screening tool for knee ligament injuries. There is some evidence that when age increases, the probability of sustaining a hamstring injury increases. Debate exists in the analysed literature regarding measurement of the flexibility of the hamstring as a predictive screening tool, as well as using the H : Q ratio. Hip-adduction-to-abduction strength is a predictive test for hip adductor muscle strain. Studies do not agree on whether ROM of the hamstring is a predictive screening tool for groin injury. Body mass index and the age of an athlete could contribute to an ankle sprain. There is support in the literature to suggest that greater strength of the plantar flexors may be a predictive measure for sustaining an ankle injury. Furthermore, there is some agreement that the measurement of postural sway is a predictive test for an ankle injury. CONCLUSIONS: The screening tools mentioned above can be recommended to medical staff and coaches for screening their athletes. Future research should focus on prospective studies in larger groups and should follow athletes over several seasons Notes: DA - 20120822 IS - 1179-2035 (Electronic) IS - 0112-1642 (Linking) LA - eng PT - Journal Article PT - Review SB - IM

(121) Dangayach P, Lu L, Hemmige V. A young man with fever and diffuse muscle pain. Journal of General Internal Medicine Conference: 37th Annual Meeting of the Society of General Internal Medicine, SGIM 2014 San Diego, CA United States Conference Start: 20140423 Conference End: 20140426 Conference Publication: (var pagings) 29 ()(pp 2014;(var.pagings):S291-S292. Ref ID: 241 Abstract: LEARNING OBJECTIVE 1: Recognize the clinical features of tropical pyomyositis. LEARNING OBJECTIVE 2: Diagnose and treat tropical pyomyositis promptly for better outcome. CASE: A previously healthy 43-year-old construction worker presented with fever and muscle pain for 8 days. His initial symptoms included a high fever up to 1020 F with left hip pain radiating down his leg. Two days prior to presentation, he noticed left shoulder pain and right elbow pain with redness, swelling, and warmth. His pain was worsened by movement. He denied muscle trauma. His fever continued to spike daily to a maximum temperature of 105 0 F. He was monogamous, married, and denied any new sexual partners, penile discharge, or skin lesions. On examination, he was febrile to 102.9 F, tachycardic to heart rate in the 120 s, and normotensive. He had limited range of motion of his left shoulder, most pronounced with abduction, and of the left hip, mainly with flexion. There was left sided gluteal point tenderness. The right elbow was erythematous and warm without palpable effusion. There were no rashes, lesions, or open wounds. His WBC was 21.6 (91 % neutrophils) with ESR 71 mm/h and CRP 32.9 mg/L. The focal muscle tenderness on exam prompted further studies. CT imaging showed fluid collections in the left iliacus muscle (2.4x8 cm), left piriformis muscle (1.2 cmx1.5 cm), and the subdeltoid bursa. The left iliacus abscess was drained, and cultures yielded Staphylococcus aureus. An attempt to drain the subdeltoid bursa was unsuccessful. Blood cultures grew methicillin susceptible Staphylococcus aureus. His transthoracic echo was negative for endocarditis. He was diagnosed with tropical pyomyositis and was initially started on intravenous vancomycin, which was changed to cefazolin when susceptibilities returned. He completed 6 weeks of therapy with resolution of all abscesses. DISCUSSION: Isolated bacterial infection of the muscles has been named "tropical pyomyositis" due to its higher incidence in equatorial regions. In the tropics, most cases occur in young healthy males. In temperate regions, the associated risk factors are immunocompromised state, intravenous drug use, or significant medical comorbidities. The most common pathogen for tropical pyomyositis is Staphylococcus aureus, with increasing reports of methicillin resistant Staphylococcus aureus. Other described pathogens are streptococci, pneumococci, enteric gram negatives, and mycobacteria. Approximately 20-50 % of cases are associated with previous muscle trauma. The commonly affected muscles include quadriceps, glutei, pectoralis major, serratus anterior, biceps, iliopsoas, gastrocnemius, abdominal and spinal muscles Notes: DB - Embase UI - 71495361 IN - (Dangayach, Lu, Hemmige) Baylor College of Medicine, Houston, TX, United States LG - English PT - Journal: Conference Abstract EM - 201425 DD - 20140617

(122) Dargan D, McCaffrey D, Kealey WDC. Pseudarthrosis of femoral neck stress fracture treated with open reduction, sliding hip screw and bone morphogenic protein. International Journal of Surgery Case Reports 3 (11) ()(pp 529-532), 2012 Date of Publication: 2012 2012;(11):529-532. Ref ID: 331 Abstract: INTRODUCTION: Pseudarthrosis of femoral neck stress fractures in young adults are associated with a high incidence of complications and revision surgery. The majority are treated urgently with closed reduction and internal fixation. PRESENTATION OF CASE: We describe a displaced tension-type femoral neck fatigue fracture presenting late. Pseudarthrosis formation prior to surgery resulted in resorption and shortening of the femoral neck. Open reduction and internal fixation was performed, with adjuvant recombinant human bone morphogenic protein-7 therapy. Radiological union was achieved by twelve weeks and by one year the patient was asymptomatic. DISCUSSION: Reports of successful management of femoral neck fatigue fracture non-unions are rare. Meyer's muscle pedicle graft, valgus subtrochanteric osteotomy, and cannulated screw fixation with autologous iliac crest bone graftare alternative procedures. CONCLUSION: This extremely rare fracture type merits open reduction to enable accurate fracture reduction. Supplementing sliding hip screw fixation with an orthobiological agent was successful in this challenging situation. Â© 2012 Surgical Associates Ltd. Published by Elsevier Ltd. All rights reserved Notes: DB - Embase UI - 2012674191 IN - (Dargan, McCaffrey, Kealey) Department of Trauma and Orthopaedics, Royal Victoria Hospital, Apartment 31, St. Johns Wharf, Laganbank Road, Belfast, BT12 6BA, United Kingdom CP - United Kingdom LG - English PT - Journal: Article EM - 201249 DD - 20121130

(123) de Sa D, Urquhart N, Philippon M, Ye JE, Simunovic N, Ayeni O. Alpha angle correction in femoroacetabular impingement. Knee Surgery, Sports Traumatology, Arthroscopy 2014; 22(4):812-822. Ref ID: 8 Notes: IS - 4

(124) de Sa D, Alradwan H, Cargnelli S, Thawer Z, Simunovic N, Cadet E et al. Extra-articular hip impingement: a systematic review examining operative treatment of psoas, subspine, ischiofemoral, and greater trochanteric/pelvic impingement. Arthroscopy 2014; 30(8):1026-1041. Ref ID: 580 Abstract: PURPOSE: Extra-articular hip impingement can be the result of psoas impingement (PI), subspine impingement (SSI), ischiofemoral impingement (IFI), and greater trochanteric/pelvic impingement (GTPI). Symptoms may be due to bony abutment or soft-tissue irritation, and often, it is a challenge to differentiate among symptoms preoperatively. Currently, the clinical picture and diagnostic criteria are still being refined for these conditions. This systematic review was conducted to examine each condition and elucidate the indications for, treatment options for, and clinical outcomes of surgical management. METHODS: We searched online databases (Medline, Embase, and PubMed) for English-language clinical studies published from database inception through December 31, 2013, addressing the surgical treatment of PI, SSI, IFI, and GTPI. For each condition, 2 independent assessors reviewed eligible studies. Descriptive statistics are presented. RESULTS: Overall, 9,521 studies were initially retrieved; ultimately, 14 studies were included examining 333 hips. For PI, arthroscopic surgery resulted in 88% of patients achieving good to excellent results, as well as significant improvements in the Harris Hip Score (P = .008), Hip Outcome Score-Activities of Daily Living (P = .02), and Hip Outcome Score-Sport (P = .04). For SSI, arthroscopic decompression, with no major complications, resulted in a mean 18.5 degrees improvement in flexion range of motion, as well as improvements in pain (mean visual analog scale score of 5.9 points preoperatively and 1.2 points postoperatively) and the modified Harris Hip Score (mean of 64.97 points preoperatively and 91.3 points postoperatively). For both IFI and GTPI, open procedures anecdotally improved patient symptoms, with no formal objective outcomes data reported. CONCLUSIONS: This review suggests that there is some evidence to support that surgical treatment, by arthroscopy for PI and SSI and by open surgery for IFI and GTPI, results in improved patient outcomes. LEVEL OF EVIDENCE: Systematic review of Level IV and V (case report) studies Notes: DA - 20140804 IS - 1526-3231 (Electronic) IS - 0749-8063 (Linking) LA - eng PT - Journal Article PT - Review SB - IM

(125) de Sa D, Urquhart N, Philippon M, Ye JE, Simunovic N, Ayeni OR. Alpha angle correction in femoroacetabular impingement. Knee Surg Sports Traumatol Arthrosc 2014; 22(4):812-821. Ref ID: 596 Abstract: PURPOSE: The predictive value of the alpha angle, currently the most validated magnetic resonance imaging parameter for CAM-impingement FAI, remains to be systematically evaluated in the orthopaedic literature. A systematic review was conducted to determine whether alpha angle correction influences clinical outcomes in patients with FAI. METHODS: We searched three databases (MEDLINE, EMBASE and PubMed) for English clinical studies published up to August 2012, reporting surgical correction of the alpha angle in patients with a primary diagnosis of FAI. Two independent assessors reviewed eligible studies. Where applicable, the Newcastle-Ottawa Scale was used to perform a quality assessment. Descriptive statistics are presented. RESULTS: Of the 1,103 studies initially retrieved, 14 fulfilled our eligibility criteria. Majority of studies (86 %) were case-control designs, with no randomized controlled trials. Variability existed in the surgical techniques and modalities used to measure pre- and post-operative alpha angles. All 14 studies reported a mean measured post-operative restoration of a normal alpha angle (equal to or less than 55 degrees ). Failure due to inadequate osseous correction was cited in 3/14 included studies. Correction resulted in significant improvements in range of motion and patient Visual Analog Scales, non-arthritic hip scores, Harris Hip Scores and the short-form-12. CONCLUSION: Based on this review, there is evidence supporting that precise surgical restoration of the alpha angle in CAM-type FAI to a minimum of less than 55 degrees will lead to improved patient outcomes. The alpha angle is a good predictor of outcome and represents a simple, reproducible and inexpensive guide that can be used intra-operatively and post-operatively Notes: DA - 20140318 IS - 1433-7347 (Electronic) IS - 0942-2056 (Linking) LA - eng PT - Journal Article PT - Review SB - IM

(126) de Sa D, Cargnelli S, Catapano M, Peterson D, Simunovic N, Larson CM et al. Efficacy of Hip Arthroscopy for the Management of Septic Arthritis: A Systematic Review. Arthroscopy 2015; 31(7):1358-1370. Ref ID: 543 Abstract: PURPOSE: This systematic review assessed the role of hip arthroscopic irrigation and debridement for eradication of infection in native joints to ascertain outcomes and complications associated with this surgical approach. METHODS: The Medline, Embase, and PubMed databases were searched on July 20, 2014, for English-language studies that addressed arthroscopic treatment of native septic hip arthritis. The studies were systematically screened and data abstracted in duplicate, with qualitative findings presented. RESULTS: There were 11 eligible studies (1 case-control study, 8 case series, and 2 case reports) reporting on 65 patients (65 hips) treated by arthroscopic irrigation and debridement for septic hip arthritis. The mean length of patient follow-up was 19.1 months (range, 6 to 84 months). The indications for surgery were as follows: pyrexia, anterior groin or hip pain with limited hip range of motion and an inability to bear weight, associated leukocytosis, an elevated erythrocyte sedimentation rate or C-reactive protein level, and/or hip imaging or aspiration results consistent with infection. Specific contraindications for surgery reported across studies included tuberculous of fungal infection, coexistence of osteomyelitis, immunocompromised individuals, and pre-existing surgery on the affected hip. The initial rate of infection eradication was 100%. All studies reported significant improvements in patient pain and function. Improvements were also observed in range of motion, as well as across both the Bennett radiographic and clinical assessments and Harris Hip Score. No complications, major or minor, were reported, and only 1 of 65 hips (1.5%) required revision arthroscopy for recurrence because of a methicillin-resistant Staphylococcus aureus infection. CONCLUSIONS: Arthroscopic native hip irrigation and debridement for septic arthritis appear to comprise a safe and effective treatment option for selected patients (e.g., no deformity, no bacterial infections, and not immunocompromised). Timely diagnosis and intervention, however, remain the most critical prognostic factors for successful outcomes. LEVEL OF EVIDENCE: Level IV, systematic review of Level IV and V studies Notes: DA - 20150706 IS - 1526-3231 (Electronic) IS - 0749-8063 (Linking) LA - eng PT - Journal Article PT - Review SB - IM

(127) de Sa D, Cargnelli S, Catapano M, Bedi A, Simunovic N, Burrow S et al. Femoroacetabular impingement in skeletally immature patients: a systematic review examining indications, outcomes, and complications of open and arthroscopic treatment. Arthroscopy 2015; 31(2):373-384. Ref ID: 559 Abstract: PURPOSE: Improvements in physical examination and radiographic appreciation of symptomatic femoroacetabular impingement (FAI) has increased the focus on early diagnosis and treatment in an adolescent population. This systematic review aimed to establish specific indications, outcomes, and complications of surgical management of adolescent FAI. METHODS: The Medline, Embase, and PubMed online databases were searched from inception until April 21, 2014, for English-language studies that addressed open and/or arthroscopic treatment of FAI in patients aged 10 to 19 years inclusively. The studies were systematically screened and data abstracted in duplicate, with qualitative findings presented. RESULTS: There were 6 eligible case series (4 with arthroscopic and 2 with open technique) and 2 conference abstracts examining 388 patients in total (435 hips), 81% of which were treated with hip arthroscopy. Overall, patients were followed up for a mean of 23.4 months postoperatively (range, 3 to 75 months). The main indication for surgery was a confirmed diagnosis of FAI with persistent pain and impaired function refractory to nonoperative interventions (activity modification, intra-articular injections, and so on). Specific contraindications included Tonnis grade 2, 3, or 4 chondral changes and acetabular dysplasia. All studies reported significant improvements in patient pain, function (e.g., no patients were "abnormally" or "severely abnormally" impaired), and satisfaction rates (84% to 100% with arthroscopic technique v 79% with open technique). Improvements also were observed in range of motion and alpha angle correction, as well as across a variety of patient-reported functional scores, with all but 7 of 388 patients (1.8%) returning to activity/sport. No major complications were reported, with only 13 of 354 hips (3.7%) treated by arthroscopy requiring revision arthroscopy for lysis of adhesions and 1 of 81 open surgical dislocation hips (1%) having asymptomatic heterotopic ossification not requiring additional management. No cases of avascular necrosis, physeal arrest or growth disturbance, or iatrogenic deformity were reported. CONCLUSIONS: Both arthroscopic and open surgical dislocation approaches for the treatment of adolescent FAI appear to be safe and effective options for patients with persistent pain and limited function after an appropriate trial of nonoperative therapy. LEVEL OF EVIDENCE: Level IV, systematic review of Level IV studies Notes: DA - 20150126 IS - 1526-3231 (Electronic) IS - 0749-8063 (Linking) LA - eng PT - Journal Article PT - Research Support, Non-U.S. Gov't PT - Review SB - IM

(128) Delahunt E, McEntee BL, Kennelly C, Green BS, Coughlan GF. Intrarater Reliability of the Adductor Squeeze Test in Gaelic Games Athletes. Journal of Athletic Training 2011; 46(3):241-246. Ref ID: 40 Notes: IS - 3

(129) Deleget A. Overview of thigh injuries in dance. Journal of dance medicine & science : official publication of the International Association for Dance Medicine & Science 14 (3) ()(pp 97-102), 2010 Date of Publication: 2010 2010;(3):97-102. Ref ID: 417 Abstract: Thigh injuries include musculotendinous strains of the quadriceps, hamstrings, adductors, iliotibial band (ITB), and bony injuries to the shaft of the femur. There is scant information in the literature regarding thigh injuries in dance, which appear to range from 5% to 16% of total injury incidence. Hamstring strains and ITB syndrome are the most commonly reported thigh injuries. Hamstring injuries occur most frequently during slow stretching when the dancer's hip is flexed and knee extended. Uniquely in dancers, adductor injury occurs concurrently with hamstring injuries in approximately one-third of cases. Snapping of the ITB at the lateral hip and knee may result from imbalance of thigh muscle strength and flexibility. To date no quadriceps strain injuries or stress injuries to the shaft of the femur have been reported in the dance medicine literature. As dancers notoriously underestimate time needed to return to dance, it can be suggested that early return to work is a contributing factor to chronic injury. Further research is needed regarding the incidence and nature of injury to the thigh among dancers Notes: DB - Embase UI - 21067687 IN - (Deleget) Harkness Center for Dance Injuries, NYU Hospital for Joint Diseases, New York, New York 10003, USA CP - United States LG - English PT - Journal: Review EM - 201000 DD - 20110304

(130) Deleplanque B, Lagueny A, Flurin V, Arnaud C, Pedespan J-M, Fontan D et al. Botulinum toxin in the management of spastic hip adductors in non-ambulatory cerebral palsy children. [French]. Revue de Chirurgie Orthopedique et Reparatrice de l'Appareil Moteur 88 (3) ()(pp 279-285), 2002 Date of Publication: 2002 2002;(3):279-285. Ref ID: 519 Abstract: Purpose of the study: Spasticity of the hip adductors is a challenging problem for children with severe motor impairment due to cerebral palsy. It inhibits motor development and is also a risk factor for hip dislocation. Botulinum toxin has been found to be an effective means of treating spastic pes equinus in walking cerebral palsy patients and could have other indications. We conducted a prospective study to determine the functional and orthopedic contribution of botulinum toxin in the treatment of spastic hip adductors in non-ambulatory cerebral palsy children. Material and methods: The study included 11 quadriplegic children with cerebral palsy (mean age 5 years 9 months). Seven of the children had unilateral migration of the hip at study onset (> 40% radiographically). The children were given a single injection of botulinum toxin (Dysport: 20 units/kg/hip) in the adductor muscles (21 treated hips). The children were seen again at months 1, 3, 6 and 12 after treatment (with the exception of one patient not seen after the 6<sup>th</sup> month at the request of the parents). Spasticity was measured with the modified Ashworth scale. The motor level was determined with 8 position and motor items and with the GMFCS classification. Hip x-rays were obtained at study onset and once or twice during the follow-up. Results: There were no adverse effects of the treatment. Spasticity decreased by one point or more on the Ashworth scale in 20 hips at month 1 and remained low at month 3 in 14, and at month 6 in 12 of the 21 hips treated. The effect of the anti-spasticity treatment faded out from the 6<sup>th</sup> to the 12<sup>th</sup> month. Three children who experienced pain in the lower limbs were definitively relieved after treatment. Nine children achieved functional improvement (progress in at least one of the motor items). Three children were able to walk with a walker and two of them improved from level IV to level III on the GMFCS. The best functional responses appeared to occur in the younger children and in those who had good results at months 3 and 6. Among the 7 children whose hip was displaced by more than 40%, 5 had an unfavorable radiological progression and underwent surgery. Discussion: This study demonstrates that the botulinum toxin can be effective against spasticity of the hip adductors and that its effect is still significant 6 months after the injection in more than half the hips treated. It has an antalgesic effect. This treatment has a functional impact even in children with severe motor impairment. The benefit has been modest but three children were able to progress to walking with a walker. The best functional results were observed in the younger children and in those whose spasticity had declined at month 3 and 6. It could thus be favored either by innate potential for motor development or by the treatment itself. The botulinum toxin did not improve the orthopedic prognosis of the children: 5 of the 7 with a risk of luxation worsened. Nevertheless, our study suggests that the botulinum toxin is a well-tolerated anti-spasticity treatment that is effective for the hip adductors providing an important contribution to the management of non-ambulatory cerebral palsy children Notes: DB - Embase UI - 2002192834 IN - (Deleplanque, Lagueny) Service de Neurologie, Hopital du Haut-Leveque, avenue de Magellan, 33600 Pessac, France (Flurin, Arnaud) CAMSP Polyvalent, Hopital des Enfants, place Amelie-Raba-Leon, 33079 Bordeaux Cedex, France (Pedespan, Fontan) Service de Neuropediatrie, Hopital des Enfants, place Amelie-Raba-Leon, 33079 Bordeaux Cedex, France (Pontallier) Service de Chirurgie Pediatrique (Pr. Vergnes), Hopital des Enfants, place Amelie-Raba-Leon, 33079 Bordeaux Cedex, France CP - France OT - Toxine botulinique dans la spasticite des adducteurs de hanche chez les enfants IMC et IMOC non marchants LG - French PT - Journal: Article EM - 200200 DD - 20020611

(131) Della Valle CJ. Large diameter femoral heads: is bigger always better? The bone & joint journal 96-B ()(pp 23-26), 2014 Date of Publication: 01 Nov 2014 2014;23-26. Ref ID: 202 Abstract: Dislocation remains among the most common complications of, and reasons for, revision of both primary and revision total hip replacements (THR). Hence, there is great interest in maximising stability to prevent this complication. Head size has been recognised to have a strong influence on the risk of dislocation post-operatively. As femoral head size increases, stability is augmented, secondary to an increase in impingement-free range of movement. Larger head sizes also greatly increase the 'jump distance' required for the head to dislocate in an appropriately positioned cup. Level-one studies support the use of larger diameter heads as they decrease the risk of dislocation following primary and revision THR. Highly cross-linked polyethylene has allowed us to increase femoral head size, without a marked increase in wear. However, the thin polyethylene liners necessary to accommodate larger heads may increase the risk of liner fracture and larger heads have also been implicated in causing soft-tissue impingement resulting in groin pain. Larger diameter heads also impart larger forces on the femoral trunnion, which may contribute to corrosion, metal release, and adverse local tissue reactions. Alternative large bearings including large ceramic heads and dual mobility bearings may mitigate some of these risks, and several of these devices have been used with clinical success Notes: DB - Embase UI - 25381403 IN - (Cooper) Lenox Hill Hospital, Department of Orthopaedic Surgery, 130 East 77th Street, New York, 10075, USA (Della Valle) Rush University Medical Center, Department of Orthopaedic Surgery, 1611 West Harrison Street, Chicago, Illinois, 60612, USA CP - United Kingdom LG - English PT - Journal: Review EM - 201508 DD - 20150213

(132) Deneweth JM, Pomeroy SM, Russell JR, McLean SG, Zernicke RF, Bedi A et al. Position-Specific Hip and Knee Kinematics in NCAA Football Athletes. Orthop J Sports Med 2014; 2(6):2325967114534591. Ref ID: 576 Abstract: BACKGROUND: Femoroacetabular impingement is a debilitating hip condition commonly affecting athletes playing American football. The condition is associated with reduced hip range of motion; however, little is known about the range-of-motion demands of football athletes. This knowledge is critical to effective management of this condition. PURPOSE: To (1) develop a normative database of game-like hip and knee kinematics used by football athletes and (2) analyze kinematic data by playing position. The hypothesis was that kinematics would be similar between running backs and defensive backs and between wide receivers and quarterbacks, and that linemen would perform the activities with the most erect lower limb posture. STUDY DESIGN: Descriptive laboratory study. METHODS: Forty National Collegiate Athletic Association (NCAA) football athletes, representing 5 playing positions (quarterback, defensive back, running back, wide receiver, offensive lineman), executed game-like maneuvers while lower body kinematics were recorded via optical motion capture. Passive hip range of motion at 90 degrees of hip flexion was assessed using a goniometer. Passive range of motion, athlete physical dimensions, hip function, and hip and knee rotations were submitted to 1-way analysis of variance to test for differences between playing positions. Correlations between maximal hip and knee kinematics and maximal hip kinematics and passive range of motion were also computed. RESULTS: Hip and knee kinematics were similar across positions. Significant differences arose with linemen, who used lower maximal knee flexion (mean +/- SD, 45.04 degrees +/- 7.27 degrees ) compared with running backs (61.20 degrees +/- 6.07 degrees ; P < .001) and wide receivers (54.67 degrees +/- 6.97 degrees ; P = .048) during the cut. No significant differences were found among positions for hip passive range of motion (overall means: 102 degrees +/- 15 degrees [flexion]; 25 degrees +/- 9 degrees [internal rotation]; 25 degrees +/- 8 degrees [external rotation]). Several maximal hip measures were found to negatively correlate with maximal knee kinematics. CONCLUSION: A normative database of hip and knee kinematics utilized by football athletes was developed. Position-specific analyses revealed that linemen use smaller joint motions when executing dynamic tasks but do not demonstrate passive range of motion deficits compared with other positions. CLINICAL RELEVANCE: Knowledge of requisite game-like hip and knee ranges of motion is critical for developing goals for nonoperative or surgical recovery of hip and knee range of motion in the symptomatic athlete. These data help to identify playing positions that require remedial hip-related strength and conditioning protocols. Negative correlations between hip and knee kinematics indicated that constrained hip motion, as seen in linemen, could promote injurious motions at the knee Notes: DA - 20151104 IS - 2325-9671 (Electronic) IS - 2325-9671 (Linking) LA - eng PT - Journal Article

(133) Deslandes M, Guillin R, Cardinal E, Hobden R, Bureau NJ. The snapping iliopsoas tendon: new mechanisms using dynamic sonography. AJR Am J Roentgenol 2008; 190(3):576-581. Ref ID: 728 Abstract: OBJECTIVE: The purpose of our study was to describe new mechanisms responsible for the snapping iliopsoas tendon using dynamic sonography. MATERIALS AND METHODS: We reviewed the video recordings obtained during dynamic sonography studies used to establish the diagnosis of 18 snapping iliopsoas tendons in 14 patients (nine females and five males; age range, 13-50 years) who presented clinically with either unilateral (n = 10) or bilateral (n = 4) snapping hips. During dynamic imaging, the transducer was positioned in a transverse oblique plane just above the hip joint parallel to the pubic bone. For all patients, the hip movement that generated the snapping consisted of bringing the hip from flexion-abduction-external rotation back to the neutral position. RESULTS: In 14 of 18 hips, the snapping was provoked by the sudden flipping of the iliopsoas tendon around the iliac muscle, allowing abrupt contact of the tendon against the pubic bone and producing an audible snap. Other causes of snapping iliopsoas tendon were bifid tendon heads flipping over one another (n = 3) and iliopsoas tendon impinging over an anterior paralabral cyst (n = 1). CONCLUSION: New mechanisms of snapping iliopsoas tendon have been described using dynamic sonography. Sudden iliopsoas tendon flipping over the iliac muscle was the most common cause of snapping hip Notes: DA - 20080221 IS - 1546-3141 (Electronic) IS - 0361-803X (Linking) LA - eng PT - Journal Article SB - AIM SB - IM

(134) Di Sante L, Paoloni M, De Benedittis S, Tognolo L, Santilli V. Groin pain and iliopsoas bursitis: Always a cause-effect relationship? Journal of Back and Musculoskeletal Rehabilitation 27 (1) ()(pp 103-106), 2014 Date of Publication: 2014 2014;(1):103-106. Ref ID: 258 Abstract: Background and Objective: Iliopsoas bursitis (IB) is characterized by inflammation and enlargement of the iliopsoas bursa. Although this condition is often associated with degenerative or inflammatory arthritis, infections, trauma, overuse and impingement syndromes, osteonecrosis and hip replacement, the pathogenesis of IB remains uncertain. We present a case report of IB associated with moderate hip osteoarthritis (HOA). Methods: We present a case report of a 73-year-old man with chronic left hip pain that did not respond to conservative treatments. An ultrasonography examination of the left hip revealed fluid-induced distension of the iliopsoas bursa, which was treated with aspiration followed by a corticosteroid-anesthetic injection. Results: At the 30-day follow-up, despite an initial improvement in the patient's symptoms, both the pain and functional limitation returned, though not in association with bursa distension. The patient therefore underwent a total hip arthroplasty, which fully relieved the symptoms. Conclusion: We hypothesize that iliopsoas bursitis may, when associated with other pathological conditions, not be the only source of pain. It should, nevertheless, be considered for differential diagnosis purposes. Â© 2014 - IOS Press and the authors. All rights reserved Notes: DB - Embase UI - 2014106057 IN - (Di Sante, Paoloni, Tognolo, Santilli) Department of Physical Medicine and Rehabilitation, Physical Medicine and Rehabilitation University, Azienda Policlinico Umberto i, Piazzale Aldo Moro 5, 00185, Rome, Italy (Di Sante, Paoloni, De Benedittis, Tognolo, Santilli) Board of Physical Medicine and Rehabilitation, Department of Orthopaedic Science, Sapienza University, Rome, Italy CP - Netherlands LG - English PT - Journal: Article EM - 201409 DD - 20140220

(135) Domb BG, Stake CE, Botser IB, Jackson TJ. Surgical dislocation of the hip versus arthroscopic treatment of femoroacetabular impingement: A prospective matched-pair study with average 2-year follow-up. Arthroscopy - Journal of Arthroscopic and Related Surgery 29 (9) ()(pp 1506-1513), 2013 Date of Publication: September 2013 2013;(9):1506-1513. Ref ID: 261 Abstract: Purpose: The purpose of this study was to prospectively compare outcomes of patients receiving surgical hip dislocation and those undergoing arthroscopic treatment for femoroacetabular impingement (FAI), using a matched-pair analysis. Methods: Between January 2008 and August 2011, patients aged 30 years or younger with a diagnosis of FAI treated with surgical dislocation or arthroscopy were included. Patients were excluded with Tonnis grade 2 or greater, dysplasia, Legg-Calve-Perthes disease, and previous hip surgery. Patients treated with surgical dislocation were pair-matched to patients treated arthroscopically in a 1:2 ratio. Patient-reported outcomes were prospectively obtained in all patients preoperatively and postoperatively at 3 months, at 1 year, at 2 years, and at latest follow-up. Alpha angles were measured preoperatively and postoperatively for both groups. Revision surgery and complications were recorded for each group. Results: Ten patients were included in the surgical dislocation group, and 20 pair-matched patients were included in the arthroscopic group. We obtained 100% follow-up at a mean of 24.8 months in the open group and 25.5 months in the arthroscopic group. Preoperative scores were similar between the 2 groups; significant improvements were made postoperatively for both groups. When we compared the 2 groups, the change in Hip Outcome ScoreeSport-Specific Subscale (42.8 v 23.5, P = .047) and 2-year Non-Arthritic Hip Score (94.2 v 85.7, P = .01) were significantly higher in the arthroscopic group. Both groups showed a significant decrease in the alpha angle postoperatively (P = .775). Conclusions: Favorable results were shown with both approaches, with significant improvement in all patient-reported outcome measures and high patient satisfaction ratings. However, arthroscopic treatment of FAI showed greater improvement in the Hip Outcome ScoreeSport-Specific Subscale and a higher absolute Non-Arthritic Hip Score at an average 2-year follow-up. Level of Evidence: Level II, prospective matched-pair comparative study. Â© 2013 by the Arthroscopy Association of North America Notes: DB - Embase UI - 2014076702 IN - (Domb, Stake, Botser, Jackson) American Hip Institute, Chicago; Hinsdale Orthopaedics, 1010 Executive Ct, Ste 250, Westmont, IL 60559, United States (Domb, Stake, Botser, Jackson) Stritch School of Medicine, Loyola University, Chicago, IL, United States CP - United States LG - English PT - Journal: Article EM - 201407 DD - 20140212

(136) Dorr LD, Jones RE, Padgett DE, Pagnano M, Ranawat AS, Trousdale RT. Robotic guidance in total hip arthroplasty: The shape of things to come. Orthopedics 34 (9) ()(pp 652-655), 2011 Date of Publication: September 2011 2011;(9):652-655. Ref ID: 390 Abstract: Surgeons want to perform a perfect total hip arthroplasty (THA) with every operation. Human performance has limitations, especially when performing a mechanical operation in a biological environment. Recent suggested changes to improve outcomes have been large femoral heads and anterior incisions, but unfortunately, neither has resulted in any scientific data that change has been effected. The scientific data tell us that poor component positions and impingement are the source of increasing mechanical complications. Therefore, attempts have been made to improve the surgeon's performance by precise quantitative knowledge in the operating room. Robotic-guided navigation provides numerical data for cup inclination plus anteversion and center of rotation; femoral leg length and offset; and combined anteversion of the cup and stem. The acetabular bone preparation is done with a reamer connected to a robotic arm, which prevents human error by the surgeon of reaming off line or too deep. This technology provides predictable and reproducible results Notes: DB - Embase UI - 2011516240 IN - (Dorr) Dorr Arthritis Institute, Good Samaritan Hospital, Los Angeles, CA, United States (Jones) University of Texas Southwestern Medical Center, Dallas, TX, United States (Padgett, Ranawat) Hospital of Special Surgery, New York, NY, United States (Pagnano) Mayo Clinic, Rochester, MN, United States (Trousdale) Mayo Graduate School of Medicine, Rochester, MN, United States CP - United States LG - English PT - Journal: Review EM - 201100 DD - 20110926

(137) Dudda M, Albers C, Mamisch TC, Werlen S, Beck M. Do normal radiographs exclude asphericity of the femoral head-neck junction? Clin Orthop Relat Res 2009; 467(3):651-659. Ref ID: 724 Abstract: Asphericity of the femoral head-neck junction is one cause for femoroacetabular impingement of the hip. However, the asphericity often is underestimated on conventional radiographs. This study compares the presence of asphericity on conventional radiographs with its appearance on radial slices of magnetic resonance arthrography (MRA). We retrospectively reviewed 58 selected hips in 148 patients who underwent a surgical dislocation of the hip. To assess the circumference of the proximal femur, alpha angle and height of asphericity were measured in 14 positions using radial slices of MRA. The hips were assigned to one of four groups depending on the appearance of the head-neck junction on anteroposterior pelvic and lateral crosstable radiographs. Group I (n = 19) was circular on both planes, Group II (n = 19) was aspheric on the crosstable view, Group III (n = 4) was aspheric on the anteroposterior view, and Group IV (n = 13) was aspheric on both views. In all four groups, the highest alpha angle was found in the anterosuperior area of the head-neck junction. Even when conventional radiographs appeared normal, an increased alpha angle was present anterosuperiorly. Without the use of radial slices in MRA, the asphericity would be underestimated in these patients Notes: DA - 20090204 IS - 1528-1132 (Electronic) IS - 0009-921X (Linking) LA - eng PT - Comparative Study PT - Journal Article SB - AIM SB - IM

(138) Dueland RT, Adams WM, Fialkowski JP, Patricelli AJ, Mathews KG, Nordheim EV. Effects of pubic symphysiodesis in dysplastic puppies. Vet Surg 2001; 30(3):201-217. Ref ID: 775 Abstract: OBJECTIVE: To determine the long-term effects of juvenile pubic symphysiodesis (JPS) in dysplastic puppies. STUDY DESIGN: Prospective, randomized, clinical trial. ANIMALS: Seven dysplastic Chesapeake Bay retrievers and 2 beagle-crosses (BX1 and 2). METHODS: Five puppies had JPS performed with electrocauterization at 12, 16, 20, 22, and 24 weeks of age, respectively. Two puppies served as controls. BX1 and BX2 were used to obtain biopsies of the symphysis. Hips were evaluated for: pelvic development (transverse computerized tomography for acetabular angle [AA] and dorsal acetabular rim angle [DARA]); laxity [hip extended and stress radiography [distraction index (DI)]); Ortolani maneuver with reduction angles; acetabular coverage (Norberg angles); and function (coxofemoral range of motion, hip pain, and gait analysis by force-plate technique at 44 and 137 weeks of age). RESULTS: The pubis fused prematurely in every puppy that was operated on with the JPS technique. Greater acetabular responses were related to younger ages at surgery. The final mean AA in dogs that had JPS was 25 degrees greater than preoperative values; 40% increased over control. The DARA final mean was 10 degrees, 52% less than preoperative values and 46% less than control. The final mean DI in dogs having JPS was 0.28, 47% improved over preoperative values and 58% better than control. Mean pelvic dimensions in dogs that had JPS were 18% less than control. Gait analyses were normal for all dogs at 137 weeks. No urinary or bowel complications occurred. CONCLUSIONS: Significant ventrolateral acetabular rotation, increased hip coverage, diminished hip laxity, normal pain-free gait, and insignificantly reduced pelvic size occurred after JPS. CLINICAL SIGNIFICANCE: Dysplastic hips in young dogs were significantly improved by JPS Notes: DA - 20010507 IS - 0161-3499 (Print) IS - 0161-3499 (Linking) LA - eng PT - Clinical Trial PT - Journal Article PT - Randomized Controlled Trial PT - Research Support, Non-U.S. Gov't SB - IM

(139) Duman A, Apiliogullari S, Duman I. Effects of intrathecal fentanyl on quality of spinal anesthesia in children undergoing inguinal hernia repair. Paediatric Anaesthesia 20 (6) ()(pp 530-536), 2010 Date of Publication: June 2010 2010;(6):530-536. Ref ID: 421 Abstract: Background: The effect of intrathecal fentanyl on the characteristics of spinal anesthesia has not been investigated in children undergoing inguinal hernia repair. The purpose of this study was to assess whether the incidence and severity of pain during peritoneal sac traction is decreased by addition of fentanyl to bupivacaine in children undergoing inguinal hernia repair with spinal anesthesia. Methods: Children (6-14 years) were randomized into two groups. Group F (n = 25): hyperbaric bupivacaine plus 0.2 mugkg <sup>-1</sup> of fentanyl. Group P (n = 25): hyperbaric bupivacaine plus 0.9% NaCl (placebo). The dose of bupivacaine was 0.4 mgkg<sup>-1</sup>. The primary variable was the incidence and severity of pain during peritoneal sac traction. Spinal block characteristics, duration of spinal anesthesia assessed by recovery of hip flexion and duration of analgesia were the secondary variables measured, and the side effects were noted. Results: There were significant differences in incidence of pain and pain scores during sac traction with lower incidence and scores in the fentanyl group (P = 0.009). Two groups were similar regarding the level of sensory block during sac traction and duration of spinal anesthesia. Duration of spinal analgesia was prolonged significantly in the fentanyl group (P = 0.025). Conclusion: Intrathecal fentanyl at a dose of 0.2 mugkg<sup>-1</sup> added to bupivacaine significantly improves the quality of intraoperative analgesia and prolongs postoperative analgesia in children undergoing inguinal hernia repair with spinal anesthesia. Â© 2010 Blackwell Publishing Ltd Notes: DB - Embase UI - 2010307850 IN - (Duman) Department of Anesthesia and Intensive Care, Medical Faculty, Konya, Turkey (Apiliogullari) Department of Anesthesiology, Faculty of Dentistry, Selcuk University, Konya, Turkey (Duman) Ministry of Health, Konya, Turkey CP - United Kingdom LG - English PT - Journal: Article EM - 201000 DD - 20100715

(140) Duncan ST, Bogunovic L, Baca G, Schoenecker PL, Clohisy JC. Are there sex-dependent differences in acetabular dysplasia characteristics? Clin Orthop Relat Res 2015; 473(4):1432-1439. Ref ID: 544 Abstract: BACKGROUND: Many patients who undergo periacetabular osteotomy (PAO) for symptomatic acetabular dysplasia experience decreased pain and improved function, yet some experience inadequate clinical improvement. The etiologies of treatment failure have not been completely defined, and sex-dependent disease characteristics that may be associated with less pain relief are not understood. QUESTION/PURPOSES: We sought to determine whether there were clinically important sex-specific differences between male and female patients undergoing PAO for acetabular dysplasia in terms of (1) clinical parameters (anthropomorphic traits and hip scores), (2) radiographic findings, and (3) intraoperative findings at the time of PAO, in particular findings potentially associated with femoroacetabular impingement (FAI) such as chondromalacia at the head-neck junction, impingement trough, or reduced head-neck offset. METHODS: Between 2007 and 2012 we treated 245 patients (270 hips) with a PAO for symptomatic acetabular dysplasia. Of those, 16 patients (16 hips; 6%) had insufficient documentation for review in the medical record and another 49 patients (51 hips; 19%) met prespecified exclusion criteria, leaving 180 patients (203 hips; 75%) for analysis in this retrospective study. One hundred thirty-nine patients were females and 41 were males. Clinical data including patient demographics, physical examination, patient self-reported outcome scores, radiographic morphologic features, and intraoperative findings were collected prospectively as part of an institutional registry. Statistical analysis was performed with univariate and multivariate analyses. RESULTS: Mean age was similar among sexes; however, BMI was greater in males compared with females (26 versus 24 kg/m(2); p = 0.002). Males had less hip ROM including internal rotation at 90 degrees flexion (14 degrees +/- 13.8 degrees versus 25 degrees +/- 16.2 degrees ; p = 0.001). Males had higher preoperative UCLA (7 +/- 2, versus 6 +/- 2; p = 0.02) and Harris hip scores (63 +/- 15 versus 58 +/- 16; p = 0.04). Radiographically, a crossover sign (88% versus 39%; p < 0.001) and posterior wall sign (92% versus 63%; p < 0.001) were more common in males. Males had greater alpha angles on the frog lateral (63 degrees +/- 15.3 degrees versus 58 degrees +/- 16 degrees ; p = 0.04) and Dunn radiograph views (64 degrees +/- 15.5 degrees versus 56 degrees +/- 14.8 degrees ; p = 0.02). The incidence of femoral head-neck chondromalacia (62% versus 82%; p = 0.03) and an impingement trough observed at surgery was greater in males (35% versus 17%; p = 0.01). Multivariate analysis showed differences between the sexes for reduced internal rotation in flexion, a higher Dunn alpha angle, increased incidence of a crossover sign, and a lower anterior center-edge angle. CONCLUSIONS: There are sex-dependent, disease characteristic differences in patients with symptomatic acetabular dysplasia. Most notably, male patients have a greater prevalence of clinical, radiographic, and intraarticular findings consistent with concurrent FAI and instability and potentially a heightened risk of secondary FAI after PAO, however postoperative and long-term followup are needed to confirm these findings and it remains unclear which patients need surgical correction of the impingement and instability. Preoperative evaluation of acetabular dysplasia in males should at least include careful attention to factors associated with symptomatic FAI; however, further studies are needed to determine when surgical correction is needed Notes: DA - 20150306 IS - 1528-1132 (Electronic) IS - 0009-921X (Linking) LA - eng PT - Journal Article PT - Research Support, Non-U.S. Gov't SB - AIM SB - IM

(141) Duthon V, Charbonnier C, Kolo FC, Magnenat-Thalmann N, Becker CD, Bouvet C et al. Correlation of clinical and MRI findings in professional dancers' hip: A new femoroacetabular impingement? Arthroscopy - Journal of Arthroscopic and Related Surgery Conference: Annual Scientific Meeting of the International Society for Hip Arthroscopy 2011 Paris France Conference Start: 20111014 Conference End: 20111015 Conference Publication: (var pagings) 2012;(var.pagings):e53. Ref ID: 368 Abstract: SUMMARY Dancer's have typical cam or pincer type femoroacetabular lesions, but with normal hip morphology. These lesions, situated in superior/postero-superior position, seem to be due to a dynamic, danse-related femoroacetabular impingement during extreme movements. DATA Purpose: Professional ballet dancers use extreme hip range of motion (ROM) to achieve ideal technique. Many complain of inguinal pain during dancing, and are at risk of early hip osteoarthritis. Goals were to clinically evaluate dancers' hip, to search femoroacetabular lesions on MRI explaining their groin pain, to assess femoroacetabular congruency in splits, to correlate clinical to MRI findings to MRI. Methods: Twenty professional female ballet dancers and fourteen active healthy female matched for age (control group) completed a questionnaire on hip pain, underwent hip examination with anterior impingement test and measures of passive ROM. All had hips MRI in back-lying position, and while doing splits for dancers, to look for femoro-acetabular morphology, lesions and congruency. Results: 12/20 dancers complained of groin pain, only while dancing; controls were asymptomatic. The mean passive hip ROM of dancers was normal with a trend to increased abduction and external rotation, and to decreased internal rotation. MRI measures of hip morphology for dancers and controls showed no difference in acetabular depth, acetabular anteversion and femoralneck antetorsion. Dancers have a lower femoral neckshaft angle. Mean alpha angle is lower in dancers in anterior, superior and postero-superior position; mean alpha angle in antero-superior position is egal in both groups. Cam morphology was found in only one dancer, none in the controls. MRI of dancers doing splits showed a fermoroacetabular subluxation of 2.05 mm. MRI of dancers' hip showed labral tears, cartilage thinning, and pits, all in superior/postero-superior position. Lesions were the same for symptomatic and asymptomatic dancers. Controls had the same amount of labral lesions but in antero-superior position, but had 2 to 3 times less cartilage lesions and pits than dancers. Conclusions: Dancer's passive hip ROM and morphology are normal. 90% of dancers present labral and/or cartilaginous lesions on MRI, symptomatic only for some of them. No criteria explain this discrepancy between clinical and MRI findings. Dancer's have typical cam or pincer type femoroacetabular lesions, but with normal hip morphology. These lesions, situated in superior/ postero-superior position, seem to be due to a dynamic, danse-related femoroacetabular impingement during extreme movements Notes: DB - Embase UI - 70795160 IN - (Duthon, Charbonnier, Kolo, Magnenat-Thalmann, Becker, Bouvet, Coppens, Hoffmeyer, Menetrey) Hopitaux Universitaires de Geneve, Geneva, Switzerland LG - English PT - Journal: Conference Abstract EM - 201228 DD - 20120705

(142) Duthon VB, Christophe FK, Charbonnier C, Duc S, Pfirrmann CW, Magnenat-Thalmann N et al. Winner of the achilles orthopedic sports medicine research award correlation of clinical and MRI findings in professional dancers' hip: A new femoroacetabular impingement? Arthroscopy - Journal of Arthroscopic and Related Surgery Conference: 8th Biennial Congress of International Society of Arthroscopy, Knee Surgery, and Orthopaedic Sports Medicine, ISAKOS 2011 Rio de Janeiro Brazil Conference Start: 20110515 Conference E 2011;(var.pagings):e258-e259. Ref ID: 329 Abstract: Background: Professional ballet dancers use extreme hip range of motion (ROM) to achieve ideal ballet technique. Many of them complain of inguinal pain during dancing, and they are at higher risk to present early hip osteoarthritis. Purpose: Aims of the study were to clinically evaluate dancers' hip, to look for femoroacetabular lesions with MRI explaining their groin pain, to assess femoroacetabular joint congruency in splits, to correlate clinical to MRI findings to MRI. Study Design: Case-control Study Methods: Professional female ballet dancers and active healthy female matched for age (control group) completed a questionnaire on hip pain, underwent hip examination with impingement tests and measures of passive range of motion (ROM). All had hips MRI, back-lying, and while doing splits for dancers, to look for femoroacetabular morphology, lesions and congruency. Results: We recruited 20 professional ballet dancers and 15 healthy active female as controls. 12/20 dancers complained of groin pain, only while dancing; control group was asymptomatic. The mean hip dancers' ROM was 133/0/19 in F/E, 56/0/20 in Abd/Add, and 33/0/56 in IR/ER; and 127/0/20 in F/E, 46/0/20 in Abd/Add and 40/0/44 in IR/ER for controls. MRI revealed a mean acetabular depth of 7.9 mm for dancers and 8.8 mm for controls, a mean neck-shaft angle of 132degree for dancers and 135degree for controls, and a mean femoral neck anteversion of 12degree for dancers and 14degree for controls. Mean alpha angle in anterior position is 48degree (range 39.9-68.3) for dancers and 47.5degree (range 39-55.1) for controls, and 53degree (38.2-76) for dancers and 47.5degree (37.3-62.3) for controls in anterosuperior position. Cam morphology was found in only one dancer, none in the control group. MRI of dancers doing splits showed a fermoroacetabular subluxation of 2.05 mm (range 0.63-3.56 mm) and 3 types of lesions: labral tears, cartilage thinning, and pits, in superior/ postero-superior position. Lesions on MRI were the same for symptomatic and asymptomatic dancers. Conclusion: Dancer's passive hip ROM is normal and comparable to control group. In this study, almost all ballet dancers present labral and/or cartilaginous lesions on MRI, symptomatic only for some of them. No criteria in the data explain why some dancers present pain and/or femoroacetabular lesions while others don't. This discrepancy between clinical and MRI findings lets us think that surgical treatment should not be only based on MRI findings. Dancers' labral and acetabular cartilaginous lesions are the same as those found in patients with femoroacetabular impingement. However, they were located in the superior or posterosuperior position of the acetabular rim, as opposed to the anterior or anterosuperior lesions found in patients with cam or pincer FAI type. In this study, only one hip presented a cam impingement explaining usual MRI lesions. For the others, such lesions could be explained by repetitive extreme movements, leading to a superior/posterosuperior dancerelated femoroacetabular impingement. Consequently, early osteoarthritis in dancers' hip could be prevented by limiting these extreme movements implying femoroacetabular abutment Notes: DB - Embase UI - 70555790 IN - (Duthon, Christophe, Charbonnier, Duc, Pfirrmann, Magnenat-Thalmann, Becker, Hoffmeyer, Menetrey) Hopitaux Universitaires de Geneve, Geneva, Switzerland LG - English PT - Journal: Conference Abstract EM - 201300 DD - 20111015

(143) Duthon VB, Charbonnier C, Kolo FC, Magnenat-Thalmann N, Becker CD, Bouvet C et al. Correlation of clinical and magnetic resonance imaging findings in hips of elite female ballet dancers. Arthroscopy 2013; 29(3):411-419. Ref ID: 619 Abstract: PURPOSE: To understand why professional female ballet dancers often complain of inguinal pain and experience early hip osteoarthritis (OA). Goals were to examine clinical and advanced imaging findings in the hips of dancers compared with those in a matched cohort of nondancers and to assess the femoral head translation in the forward split position using magnetic resonance imaging (MRI). METHODS: Twenty professional female ballet dancers and 14 active healthy female individuals matched for age (control group) completed a questionnaire on hip pain and underwent hip examination with impingement tests and measurement of passive hip range of motion (ROM). All had a pelvic 1.5 T MRI in the back-lying position to assess femoroacetabular morphologic features and lesions. For the dancers, additional MR images were acquired in the split position to evaluate femoroacetabular congruency. RESULTS: Twelve of 20 dancers complained of groin pain only while dancing; controls were asymptomatic. Dancers' passive hip ROM was normal. No differences in alpha neck angle, acetabular depth, acetabular version, and femoral neck anteversion were found between dancers and controls. MRI of dancers while performing splits showed a mean femoral head subluxation of 2.05 mm. MRI of dancers' hips showed labral tears, cartilage thinning, and herniation pits, located in superior and posterosuperior positions. Lesions were the same for symptomatic and asymptomatic dancers. Controls had proportionally the same number of labral lesions but in an anterosuperior position. They also had 2 to 3 times fewer cartilage lesions and pits than did dancers. CONCLUSIONS: The results of our study are consistent with our hypothesis that repetitive extreme movements can cause femoral head subluxations and femoroacetabular abutments in female ballet dancers with normal hip morphologic features, which could result in early OA. Pathologic changes seen on MRI were symptomatic in less than two thirds of the dancers. LEVEL OF EVIDENCE: Level IV, therapeutic case series Notes: DA - 20130402 IS - 1526-3231 (Electronic) IS - 0749-8063 (Linking) LA - eng PT - Journal Article SB - IM

(144) Dy CJ, Schroder SJ, Thompson MT, Alexander JW, Noble PC. Etiology and severity of impingement injuries of the acetabular labrum: What is the role of femoral morphology? Orthopedics 35 (6) ()(pp e778-e784), 2012 Date of Publication: June 2012 2012;(6):e778-e784. Ref ID: 357 Abstract: Injuries to the acetabular labrum have been seen in association with femoroacetabular impingement, but recent studies have reported labral pathology in patients with normal hip morphology. The hypothesis of the current study was that labral lesions could occur without femoroacetabular impingement but that labral pathology would occur more commonly and more severely in hip joints that exhibit reduced head-neck offset. The presence, location, and severity of labral injury were recorded in 22 cadaveric specimens. Computed tomography was used to define the anatomic parameters of proximal femoral morphology. Three-dimensional modeling was used to simulate hip positions that typically cause labral impingement, including high flexion and internal rotation. Femoral morphology was compared between specimens with and without labral pathology using descriptive statistics. Labral pathology was seen in 15 of 22 specimens and was located in the anterosuperior portion of the labrum. No difference existed in age, femoral neck shaft angle, anteversion, acetabular depth, head diameter, alpha angle, or beta angle between specimens with and without labral pathology. The severity of labral pathology correlated with the alpha angle of the proximal femur. This study demonstrates that damage to the labrum may occur in hips with normal proximal femur morphology. However, the findings also indicate that the presence of morphologic features that increase the risk of impingement may predispose the hip joint to a characteristic pattern or severity of labral pathology. The results confirm the importance of considering both femoral morphology and athletic-type activities of the hip when determining the mechanism responsible for injury of the acetabular labrum Notes: DB - Embase UI - 2012464596 IN - (Dy, Schroder, Thompson, Alexander) Institute of Orthopaedic Research and Education, Houston, TX, United States (Dy) Department of Orthopaedic Surgery, Hospital for Special Surgery, 535 E 70th St, New York, NY 10021, United States (Schroder) Department of Orthopaedic Surgery, University of California Irvine, Irvine, CA, United States (Noble) Barnhart Department of Orthopaedic Surgery, Baylor College of Medicine, Houston, TX, United States CP - United States LG - English PT - Journal: Article EM - 201236 DD - 20120903

(145) Earl JE, Hoch A, Labisch T, Ochsenwald J, Worman B, Lachacz J et al. Patient outcomes, strength, and lower extremity biomechanics following a proximal rehabilitation program in women with patellofemoral pain syndrome. Journal of Orthopaedic & Sports Physical Therapy 2010; 40(3):38. Ref ID: 126 Notes: ID - 105141368 IS - 3 CY - La Crosse, Wisconsin

(146) Earl RT, Jenkins R, Munro AJ. A double-masked comparison of the efficacy of once-daily sustained-release ibuprofen and once-daily piroxicam for 24-hour control of arthralgia due to osteoarthritis in the elderly. Current Therapeutic Research - Clinical and Experimental 57 (10) ()(pp 811-821), 1996 Date of Publication: 1996 1996;(10):811-821. Ref ID: 528 Abstract: The efficacy and safety of a novel, once-daily, sustained-release (SR) tablet formulation of ibuprofen (2 x 800 mg) and once-daily piroxicam (2 x 10 mg) were compared in 59 elderly patients (age range, 55 to 92 years) with osteoarthritis of the hip and/or knee, in a randomized, double-masked, double-dummy, parallel-group trial over a period of 4 weeks. Approximately twice as many patients were randomized to receive SR ibuprofen (n = 38) as piroxicam (n = 21). Dosing took place daily in the early evening. Goniometric assessment of joint restriction was performed at baseline and at weeks 1, 2, and 4. Patients assessed their joint pain on a visual analog scale (VAS) in the early and late morning, early evening, and at bedtime at baseline and weekly thereafter. No significant differences were identified between treatments in terms of goniometrically assessed joint restriction, and both treatments were equally effective in alleviating arthralgia. Of the patients receiving SR ibuprofen, 76% (29 of 38) judged it to be effective in reducing joint pain, compared with 71% (15 of 21) receiving piroxicam, a nonsignificant difference. Early and late morning VAS pain scores at each of weeks 1 through 4 for the SR ibuprofen-treated group were significantly lower than at baseline, whereas for the piroxicam group,only the early morning pain scores at weeks 3 and 4 were significantly improved. Early evening (predosing) pain scores were significantly reduced versus baseline at week 4 with SR ibuprofen but at none of the early evening assessments in the piroxicam group. This indicated a tendency toward better 24-hour control of pain by SR ibuprofen than by piroxicam. The difference between the incidence of gastrointestinal-related symptoms in patients receiving SR ibuprofen (2 of 38; 5%) versus piroxicam (3 of 21; 14%) was not statistically significant. It was concluded that once-daily SR ibuprofen was at least as effective in relieving arthralgia as piroxicam over a 24-hour period but with a propensity for producing a lower incidence of gastrointestinal disturbances in elderly patients. Ibuprofen SR tablets combined effective control of painful arthralgia attributable to osteoarthritis of the hip and knee, with the acknowledged excellent safety profile of this nonsteroidal anti-inflammatory drug Notes: DB - Embase UI - 1996339504 IN - (Earl, Jenkins) Knoll Pharmaceuticals, Nottingham, United Kingdom (Munro) Association for Clinical Research, Twickenham, United Kingdom (Earl) Knoll Pharmaceuticals, Pennyfoot Street, Nottingham, NG1 1GF, United Kingdom CP - United States LG - English PT - Journal: Article EM - 199600 DD - 19961213

(147) Ecker TM, Bastian JD, Keel MJB, Liu L, Pascal H, Tannast M et al. Periacetabular osteotomy performed through the pararectus approach-a cadaveric feasibility study. Swiss Medical Weekly Conference: Annual Meeting of the Swiss Society of Orthopaedics and Traumatology 2014 St Gallen Switzerland Conference Start: 20140625 Conference End: 20140627 Conference Publication: (var pagings) 144 ()(pp 5S), 2014 Date of Pu 2014;(var.pagings):5S. Ref ID: 207 Abstract: Introduction: The common goal of all surgical approaches for periacetabular osteotomy (PAO) is to provide accurate and adequate exposure for the osteotomies and the reorientation of the acetabulum and at the same time minimize morbidity. While the Pararectus approach had initially been developed for anterior intrapelvic management of acetabular fractures, the purpose of this study was to assess feasibility and safety of this approach for performance of PAO. We proposed to compare fragment mobility and correction potential to a modified Smith-Petersen approach and investigate possibilities for fragment fixation. Material and Methods: Preoperative CT scans of four cadaver pelves were obtained and three-dimensional models were reconstructed. In a supine position, four Smith-Petersen and four Pararectus approaches were established. Dynamic reference bases were affixed to the pelvis and the acetabulum and the anterior pelvic plane was digitized. The osteotomies were performed either according to the traditional technique or in an inside-out technique for the Pararectus approach. An experimental navigation system was used to assess acetabular version and inclination and to track movement of the acetabular fragment. One single examiner reoriented the acetabulum to a maximum in four degrees of freedom: extension, internal rotation, external rotation and medialization. Results: The inside-out osteotomies were achieved without intraarticular penetrations or transsection of the posterior column. The median values Pararectus versus Smith Petersen were: extension 21degree (range 13 to 27) versus 20degree (14 to 32), internal rotation 10degree (range 10 to 29) versus 11degree (8 to 22), external rotation 33degree (range 20 to 37) versus 25degree (11 to 44), medialization 12 mm (range 8 to 26) versus 10 mm (8 to 26). Screw fixation through the Pararectus approach was achieved safely in all pelves with one screw into the posterior column, one into the supraacetabular bone stock and another through the superior pubic ramus. Discussion: Performance of PAO through the Pararectus approach is feasible, allowing for safe extraarticular osteotomies. Management of the acetabular fragment from inside the pelvis yields fragment mobility equal to that of the conventional technique and permits rigid screw fixation. One limitation is the impossibility for anterior hip arthrotomy in cases of concomitant cam impingement Notes: DB - Embase UI - 71754903 IN - (Ecker) Inselspital, Switzerland (Bastian, Keel, Pascal, Tannast, Siebenrock) Universitatsklinik fur Orthopadische Chirurgie, Inselspital Bern, Switzerland (Liu) Institute for Surgical Technology and Biomechanics, Universitat Bern, Switzerland LG - English PT - Journal: Conference Abstract EM - 201506 DD - 20150117

(148) El Hage S, Rachkidi R, Noun Z, Haidar R, Dagher F, Kharrat K et al. Is percutaneous adductor tenotomy as effective and safe as the open procedure? J Pediatr Orthop 2010; 30(5):485-488. Ref ID: 686 Abstract: BACKGROUND: Percutaneous adductor longus tenotomy (PAT) is a frequently used procedure, yet no study has ever compared its effectiveness and safety with those of open adductor longus tenotomy (OAT). We conducted this prospective study to describe the effects of PAT and to compare them with those of OAT. METHODS: This consisted of a cross-over randomized controlled trial including 50 consecutive hips from 27 patients with cerebral palsy scheduled for adductor tenotomy in the setting of multilevel tendon lengthening/release procedures or hip surgery (femoral or Dega osteotomy) in a university hospital. A pediatric orthopaedic surgeon conducted a PAT. Another surgeon extended the wound to explore what had been cut during the PAT, and completed the tenotomy if necessary. Hip abduction (HA) was assessed by a third surgeon immediately before PAT, after PAT, and then after OAT, using a goniometer, in a standardized reproducible manner. All 3 surgeons were blinded to the others' findings. Primary end-points included the percentage of tendon/muscle portion sectioned percutaneously, and the HA measure. Comparison between HA after PAT and OAT was done using a paired t-test with a 95% confidence interval. The influence of anatomic variants of adductor longus origin was also assessed. RESULTS: Mean HA (hips flexed) measured 40.36 degrees preoperatively and increased to 50.04 degrees after PAT (P<0.0001). After OAT, HA averaged 53.32 degrees with no statistical gain compared with that observed after PAT (P=0.2). The tendinous portion of adductor longus was cut to an average of 98% by PAT (completely in 46 cases and more than 75% in only 4 cases). The muscular portion of adductor longus origin was cut to an average of 83.7% (completely in only 15 cases, cut to more than 75% in 26 cases, and approximately 50% in 9 cases). The gain in HA positively correlated with the extent of the tendinous portion divided (P=0.03) but not with the extent of muscular portion divided. Results were independent of the anatomic variants of adductor longus origin. Partial section of adductor brevis after PAT was encountered in 6 cases. No major iatrogenic lesion was observed (obturator nerve, major vessels). CONCLUSIONS: This is the only prospective study concerning the effects of PAT. The anatomic factor associated with gain in HA seems to be the extent of the section of the tendinous portion of adductor longus origin, which was found to be cut to more than 90% in all cases after PAT. The extent of muscular portion section does not seem to influence the gain in HA. The researchers detail the technique of percutaneous adductor tenotomy and show that when done correctly, PAT is a fast and simple procedure, as reliable and effective as the open release and without any major risks. LEVEL OF EVIDENCE: Level II therapeutic study-prospective comparative study Notes: DA - 20100624 IS - 1539-2570 (Electronic) IS - 0271-6798 (Linking) LA - eng PT - Comparative Study PT - Journal Article PT - Randomized Controlled Trial SB - IM

(149) Elia DS, Bohannon RW, Cameron D, Albro RC. Dynamic pelvic stabilization during hip flexion: A comparison study. Journal of Orthopaedic and Sports Physical Therapy 24 (1) ()(pp 30-36), 1996 Date of Publication: July 1996 1996;(1):30-36. Ref ID: 530 Abstract: Although physical therapists sometimes provide stabilization training for individuals with low back problems, research verifying the capacity of such training to alter pelvifemoral rhythm is lacking. This study was conducted to determine if pelvic movement could be limited by individuals who attempted active cocontraction of the abdominal and trunk extensor muscles during hip flexion. An experienced group consisting of 13 physical therapists familiar with stabilization training was compared with a novice group of 13 healthy individuals unfamiliar with such training prior to participation. All subjects were videotaped while supine, performing bilateral hip flexion. Trials were recorded both with and without attempts at limiting pelvic movement, which was digitized and analyzed from the videotape using the Peak 2-D Motion Measurement System. Inferential statistics, including a 2 x 2 x 2 analysis of variance and post hoc t tests, revealed that in the experienced group stabilization attempts resulted in significantly less pelvic movement. No significant differences were found between the stabilized and unstabilized trials of the novice group. The results of this study indicate that pelvic movement can be actively limited during hip flexion by physical therapists familiar with stabilization training. No subject, however, was able to eliminate movement Notes: DB - Embase UI - 1996210961 IN - (Elia) Pl. Sports Med. and Rehabilitation, Pittsford, NY, United States (Elia) 40 Selborne Chase, Fairport, NY 14450, United States (Elia) Dept. of Orthopedic Physical Therapy, Quinnipiac College, Hamden, CT, United States (Bohannon) Physical Therapy Program, School of Allied Health, University of Connecticut, Storrs, CT, United States (Bohannon) Department of Rehabilitation, Hartford Hospital, Hartford, CT, United States (Cameron, Albro) Physical Therapy Department, Sch. of All. Hlth. and Nat. Sciences, Quinnipiac College, Hamden, CT, United States CP - United States LG - English PT - Journal: Article EM - 199600 DD - 19960808

(150) Emara K, Samir W, Motasem eH, Ghafar KA. Conservative treatment for mild femoroacetabular impingement. J Orthop Surg (Hong Kong) 2011; 19(1):41-45. Ref ID: 666 Abstract: PURPOSE: To report early results of conservative treatments (including modifications in activities of daily living) for mild femoroacetabular impingement. METHODS: 27 male and 10 female athletic patients aged 23 to 47 years presented with unilateral hip pain secondary to femoroacetabular impingement and an alpha angle of <60 degrees. Patients were instructed to adapt to their safe range of movement and perform activities of daily living with minimal friction. The Harris Hip Score and non-arthritic hip score before and after treatment were compared. Open or arthroscopic hip surgery to remove the impinging bone was indicated when conservative treatment failed. RESULTS: Patients were followed up for 25 to 28 months. Of the 37 patients, 4 underwent surgical treatment after conservative management failed. For the remaining 33 patients, the mean Harris Hip Score improved significantly from 72 before treatment to 91 at the 24-month follow-up. The mean non-arthritic hip scores improved from 72 to 91, and the mean visual analogue scores for hip pain from 6 to 2. Six of the 33 patients had recurrent hip pain and discomfort but not severe enough for surgical treatment. CONCLUSION: Conservative treatment did not improve the range of hip movement, despite improvement in function and symptoms. Yet it achieved good early results, as long as the patients could modify activities of daily living to adapt to their hip morphology Notes: DA - 20110426 IS - 1022-5536 (Print) IS - 1022-5536 (Linking) LA - eng PT - Comparative Study PT - Journal Article SB - IM

(151) Emery CA, Meeuwisse WH. Risk factors for groin injuries in hockey. Med Sci Sports Exerc 2001; 33(9):1423-1433. Ref ID: 774 Abstract: PURPOSE: The objective of this cohort study was to determine the level of off-season sport specific activity, peak isometric adductor torque, and hip abduction flexibility that are predictive of groin or abdominal strain injury in the National Hockey League (NHL). METHODS: The subjects were 1292 consenting NHL players. Estimated relative risks of injury are reported using the following exposures: 1) level of sport specific training in the off-season, 2) peak isometric adductor torque, 3) total hip abduction flexibility, 4) previous injury, 5) years of NHL experience, and 6) skate blade hollow measurement. Estimates of probability of injury are predicted for various levels of exposures on the basis of logistic regression analysis. RESULTS: During training camp, players who reported less than 18 sessions sport specific training in the off-season were at greater than three times the risk of injury than those who did not (relative risk (RR); 3.38 95% confidence interval (CI), 1.45-7.92). Players who reported previous history of this injury were at more than two times the risk of injury than those who did not (RR, 2.88; 95% CI, 1.33-6.26). Veterans were at greater than five times the risk of injury than rookies (RR, 5.69; 95% CI, 2.05-15.85). Peak isometric adductor torque, total abduction flexibility, and skate blade hollow measurement were not predictive of injury. There is evidence of a dose-response gradient as predicted probability of injury decreases with increasing levels of sport specific training. In the regular season, sport specific training was not as strong a risk factor (RR, 2.32; 95% CI, 1.0-5.39). CONCLUSION: Low levels of off-season sport specific training and previous injury are clearly risks for groin injury at an elite level of hockey. Future research is required to investigate prevention strategies for this injury in hockey Notes: DA - 20010830 IS - 0195-9131 (Print) IS - 0195-9131 (Linking) LA - eng PT - Journal Article PT - Research Support, Non-U.S. Gov't SB - IM SB - S

(152) Engle J, Stickevers S, Edelstein Y. Femoral acetabular impingement with associated labral teartreated with ultrasound-guided intra-articular steroid injection: case report. American Journal of Physical Medicine & Rehabilitation 2014;(suppl):76. Ref ID: 105 Abstract: Case Diagnosis: Femoral Acetabular Impingement. Case Description: A 50 year old male with history of osteoarthritis and chronic low back pain presented to clinic with progressively worsening right hip and groin pain limiting ambulation. Patient was found to have antalgic gait and decreased range of motion in right hip secondary to pain. MRI revealed an anterosuperior labral tear, increased alpha angle of 67 degrees, acetabular marrow edema, joint space narrowing, and osteophyte formation consistent with CAM type femoral acetabular impingement (FAI). Ultrasound of right hip revealed prominent osteophytes on both the femoral head and acetabulum. Patient underwent right hip ultrasound-guided intra-articular steroid injection via anterior approach without incident. Patient reported complete resolution of pain and increased range of motion. Discussions: FAI results from mechanical overload of the hip due to abnormal contact stresses between the acetabulum and the femur resulting in labral tears which contribute to the development of osteoarthritis. Xrays and MRIs are the imaging modalities of choice for FAI. Conservative treatment with NSAIDs may be attempted, but patients should be monitored closely for disease progression. Surgical management of FAI aims to repair labral defects, decrease femoral head-neck offset, and CAM lesions. Minimally invasive arthroscopic osteochondroplasty with labral debridement yields decreased recovery time but this procedure is associated with an increased risk for sciatic and femoral neuropraxia. Mini-open osteochondroplasty labral repair with or without arthroscopy is associated with a higher incidence of iatrogenic lateral femoral cutaneous nerve injury. Open osteochondroplasty with dislocation is associated with a longer recovery time and higher rate of future hip arthroplasty. Conclusions: Early recognition of FAI is crucial to prevention of degenerative changes in the hip. Many factors contribute to CAM type FAI and best treatments for FAI will be identified through further research Notes: ID - 103944061 CY - Baltimore, Maryland

(153) Enseki KR, Martin RL, Draovitch P, Kelly BT, Philippon MJ, Schenker ML. The hip joint: Arthroscopic procedures and postoperative rehabilitation. Journal of Orthopaedic and Sports Physical Therapy 36 (7) ()(pp 516-525), 2006 Date of Publication: July 2006 2006;(7):516-525. Ref ID: 496 Abstract: Recent technological improvements have resulted in a greater number of surgical options available for individuals with hip joint pathology. These options are particularly pertinent to the relatively younger and more active population. The diagnosis and treatment of acetabular labral tears have become topics of particular interest. Improvements in diagnostic capability and surgical technology have resulted in an increased number of arthroscopic procedures being performed to address acetabular labral tears and associated pathology. Associated conditions include capsular laxity, femoral-acetabular impingement, and chondral lesions. Arthroscopic techniques include labral tear resection, labral repair, capsular modification, osteoplasty, and microfracture procedures. Postoperative rehabilitation following arthroscopic procedures of the hip joint carries particular concerns regarding range of motion, weight-bearing precautions, and initiation of strength activities. Postoperative rehabilitation protocols that have been typically used for surgeries such as total hip arthroplasty are often not sufficient for the population of patients undergoing arthroscopic procedures of the hip joint. Postoperative rehabilitation should be based upon the principles of tissue healing as well as individual patient characteristics. As arthroscopic procedures to address acetabular labral tears and associated pathology evolve, physical therapists have the opportunity to play a significant role through the development of corresponding rehabilitation protocols Notes: DB - Embase UI - 2006322372 IN - (Enseki) University of Pittsburgh Center for Sports Medicine, Department of Physical Therapy, University of Pittsburgh School of Health and Rehabilitation Sciences, Pittsburgh, PA, United States (Martin) Department of Physical Therapy, Duquesne University, Pittsburgh, PA, United States (Draovitch) Center for Rehab. Services, University of Pittsburgh Center for Sports Medicine, Pittsburgh, PA, United States (Kelly) Department of Orthopaedic Surgery, Hospital for Special Surgery, Weill Medical College of Cornell University, New York, NY, United States (Philippon) Steadman-Hawkins Clinic, Steadman-Hawkins Research Foundation, Vail, CO, United States (Schenker) Steadman-Hawkins Research Foundation, Vail, CO, United States (Enseki) Center for Rehab. Services, UPMC Sports Medicine Complex, 3200 South Water Street, Pittsburgh, PA 15203, United States CP - United States LG - English PT - Journal: Review EM - 200600 DD - 20060727

(154) Fabricant PD, Heyworth BE, Kelly BT. Hip arthroscopy improves symptoms associated with FAI in selected adolescent athletes. Clin Orthop Relat Res 2012; 470(1):261-269. Ref ID: 659 Abstract: BACKGROUND: Femoroacetabular impingement (FAI) is increasingly diagnosed in young and middle-aged patients. Although arthroscopic procedures are becoming frequently used in the treatment of FAI, there are little data regarding rates of complications or the ability of hip arthroscopy to improve hip function specifically in the adolescent athlete population. Because arthroscopic treatment is being used in the treatment of FAI, it is vital to know what, if any, improvements in hip function can be expected and the potential complications. QUESTIONS/PURPOSES: We asked (1) whether validated measures of hip function improve after arthroscopic treatment of FAI in adolescent athletes, and (2) what complications might be expected during and after arthroscopic treatment of FAI in these patients. METHODS: We retrospectively reviewed the records of 27 hips in 21 patients 19 years of age or younger who underwent arthroscopic treatment for FAI between 2007 and 2008. From the records we extracted demographic data, operative details, complications, and preoperative and postoperative modified Harris hip scores (HHS) and the Hip Outcome Score (HOS). The minimum followup was 1 year (average, 1.5 years; range, 1-2.5 years). RESULTS: Modified HHS improved by an average of 21 points, the activities of daily living subset of the HOS improved by an average of 16 points, and the sports outcome subset of the HOS improved by an average of 32 points. All patients' self-reported ability to engage in their preoperative level of athletic competition improved. In 24 hips that underwent cam decompression, the mean alpha-angle improved from 64 degrees +/- 16 degrees to 40 degrees +/- 5.3 degrees postoperatively. CONCLUSIONS: We found short-term improvements in HOS and HHS with no complications for arthroscopic treatment of FAI in our cohort of adolescent athletes. We believe arthroscopic treatment of FAI by an experienced hip arthroscopist should be considered in selected patients when treating athletically active adolescents for whom nonoperative management fails Notes: DA - 20111215 IS - 1528-1132 (Electronic) IS - 0009-921X (Linking) LA - eng PT - Journal Article SB - AIM SB - IM

(155) Farkas G, Haro M, Lee S, Orias AE, Nho S. Hip center edge angle and alpha angle correlate with gait variables in femoroacetabular impingement morphology. FASEB Journal Conference: Experimental Biology 2014, EB San Diego, CA United States Conference Start: 20140426 Conference End: 20140430 Conference Publication: (var pagings) 28 (1 SUPPL 1) , 2014 Date of Publication: April 2014 2014;(var.pagings). Ref ID: 249 Abstract: Gait deviations have been observed in symptomatic femoroacetabular impingement (FAI) and other disorders of hip morphology1-2. However the nature of the relationship between hip morphology and gait is still unclear. We hypothesize that when FAI is diagnosed via the alpha or center edge angles, significant associations with kinematic and kinetic gait variables will be present. This IRB approved study recruited 20 preoperative patients scheduled for FAI hip arthroscopy. Subjects with back or lower extremity pathologies were excluded. Gait testing was performed using published methods3. Radiographs measured by a single observer were compared to range of motion and peak external moments (%body weight x height) about the surgical side hip and knee. Significant correlations were found between the center edge angle and minimum knee flexion angle (R=0.460, p=0.041) as well as peak external knee extension moment (R=0.547, p=0.013). Alpha angle significantly correlated with peak external hip extension moment (R=0.447, p=0.048). A moderate correlation was found between the alpha angle and minimum hip flexion angle (R=0.414, p=0.069) and the center edge angle and peak external hip flexion moment (R=-0.399, p=0.081).The relationships seen with this preliminary data are encouraging and support the association between hip morphological abnormalities and gait variables Notes: DB - Embase UI - 71418600 IN - (Farkas, Haro, Lee, Orias, Nho) Orthopaedic Surgery, Rush University Medical Center, Chicago, IL, United States LG - English PT - Journal: Conference Abstract EM - 201417 DD - 20140422

(156) Farkas GJ, Cvetanovich GL, Rajan KB, Espinoza Orias AA, Nho SJ. Impact of Femoroacetabular Impingement Morphology on Gait Assessment in Symptomatic Patients. Sports Health 2015; 7(5):429-436. Ref ID: 536 Abstract: BACKGROUND: Gait is abnormal in patients with femoroacetabular impingement (FAI). To date, studies have not correlated radiographic FAI morphology with gait abnormalities. HYPOTHESIS: Gait abnormalities in FAI patients will be associated with radiographic FAI morphology. STUDY DESIGN: Cross-sectional study. LEVEL OF EVIDENCE: Level 4. METHODS: Patients with symptomatic FAI (n = 20) underwent radiographic and gait analysis. Exclusion criteria included previous injuries or surgeries to the lower extremities or lumbar spine as well as bilateral symptomatic FAI. The alpha angle (AA) and center-edge angle (CEA) were measured on anteroposterior (AP) pelvis, Dunn lateral, and false-profile radiographs, and inter- and intraobserver variability was determined. Motion analysis techniques were used to obtain gait data including 3-dimensional kinematic and kinetic data. Descriptive analysis was performed using Spearman correlations for morphologic measurements. A stepwise regression model was used to examine the association of gait measures with AA and CEA. RESULTS: Intraobserver agreement for the AA and CEA was 0.92 (CI, 0.80-0.97) and 0.90 (CI, 0.76-0.96), while interobserver agreement for the angles was 0.96 (CI, 0.89-0.98) and 0.96 (CI, 0.90-0.98), respectively. Descriptive analysis suggested correlations between AA and peak external hip and knee external rotation moments, maximum ankle flexion angle, and ankle range of motion (range, -0.51 to 0.42; P < 0.0001). The CEA correlated with stride, peak external ankle eversion and inversion moments, peak external knee extension moment, and peak external hip flexion moment (range, -0.44 to 0.51; P < 0.0001). We found that gait variables accounted for a large amount of variation in AA (8 variables accounted for 87% variation) and in CEA (7 variables accounted for 82% variation). CONCLUSION: Lower extremity gait parameters correlate highly with radiographic FAI morphology in symptomatic FAI patients. CLINICAL RELEVANCE: Gait abnormalities are present in FAI patients and may be a useful measure in outcome studies Notes: DA - 20151027 IS - 1941-0921 (Electronic) IS - 1941-0921 (Linking) LA - eng PT - Journal Article SB - IM

(157) Fasmeyer J, Lunebourg A, Fischer J-F, Husmann O, Vuilleumier B. Diagnosis and management of failed metal-on-metal total hip arthroplasty. Swiss Medical Weekly Conference: Annual Meeting of the Swiss Society of Orthopaedics and Traumatology 2013 Lausanne Switzerland Conference Start: 20130626 Conference End: 20130628 Conference Publication: (var pagings) 143 ()(pp 32S), 2013 Date of Pub 2013;(var.pagings):32S. Ref ID: 208 Abstract: Introduction: Large head metal-on-metal (MoM) total hip arthroplasty (THA) has been considered as particularly interesting in young and active patients. This type of total hip replacement has several advantages, such as less wear, lower risk of dislocation and better range of motion. Unfortunately, revision rate is significatively higher. The purpose of this study is to review our revision cases and to define clinical, biological and radiological criteria helping us to decide if revision surgery of a large head MoM THA is necessary (flow chart). Technical and surgical aspects are discussed. Materials and methods: Between 2005 and 2012 we implanted 352 large head MoM THA. We reviewed all patients with large head MoM THA operated in our department during this period. 17 (5%) patients with a mean age of 67 years (+/- 9) have been revised. Patients complains were noted. They all had blood test analysis (FBC, PCR, chrome/cobalt serum concentration) and standard x-ray. Sometimes CT and hip aspiration were necessary to obtain a better assessment. Anatomopathological and microbiological analysis were obtained systematically. Results: With a mean follow-up of 5 years (+/- 2) after THA, 13 patients presented pain associated with a decreased range of motion, 2 patients a periprosthetic fracture, 1 patient with a swelling around the thigh and 1 infection. In all cases, chrome/cobalt serum level was elevated (maximum Chrome/Cobalt: 2203/2344 nm/l). No superficial signs of inflammation were reported but blood test sometimes showed increased inflammatory parameters, which needed complementary investigation by hip aspiration. On the x-ray analysis, implants were in an adequate position except in 2 cases, where the cup was too vertical (>45degree of inclination). Osteolysis was rarely obvious on standard X-ray, but was uncovered by CT scan, particularly on the acetabular side. In 14 cases, revision included cup and femoral head exchange and in 3 cases cup and stem were revised. Aggressive synovitis with local invasion of muscles (gluteus medius and psoas) and metallosis were observed and confirmed by anatomopathological analysis. Conclusion: Large head MoM THA represents a serious concern because of a high rate of revision. Pain and decreased range of motion with a high blood level of chrome/cobalt were routinely found. Revision of MoM THA involved most of the time an exchange of the cup and the femoral head. Surgery could be complicated by severe cancellous bone resorption on the acetabular side and/or lysis of tendon attachment. Patients with large head MoM THA should be closely followed-up. In case of clinical complains, elevated Chrome/Cobalt serum concentration or radiological (standard X-rays, CT) abnormalities, early revision should be proposed Notes: DB - Embase UI - 71755609 IN - (Fasmeyer, Lunebourg, Fischer, Husmann, Vuilleumier) eHnv, Yverdon, Switzerland LG - English PT - Journal: Conference Abstract EM - 201506 DD - 20150117

(158) Ferro FP, Ho CP, Briggs KK, Philippon MJ. Patient-centered outcomes after hip arthroscopy for femoroacetabular impingement and labral tears are not different in patients with normal, high, or low femoral version. Arthroscopy 2015; 31(3):454-459. Ref ID: 547 Abstract: PURPOSE: The purpose of this study was to determine whether outcomes after hip arthroscopy were different based on femoral version. METHODS: The inclusion criteria were diagnosis of femoroacetabular impingement (FAI) based on clinical examination and/or imaging findings and preoperative measurement of femoral version by magnetic resonance imaging. For this study, the definition of FAI was a positive impingement sign, a positive flexion-abduction-external rotation examination finding, or radiographic signs of impingement. A query of a prospective data registry identified 180 patients who matched the inclusion and exclusion criteria. Group 1 had version of less than 5 degrees (n = 48), group 2 had version of 5 degrees to 15 degrees (n = 84), and group 3 had version greater than 15 degrees (n = 48). The mean age of the patients was 35 years (range, 18 to 61 years). RESULTS: On radiographic examination, the mean alpha angle for all patients' injured hips was 63 degrees (range, 42 degrees to 88 degrees ). The mean center-edge angle was 30 degrees (range, 20 degrees to 43 degrees ), and mean femoral version was 9.9 degrees (range, -16 degrees to 29 degrees ). There was no significant difference in age, alpha angle, or center-edge angle among the 3 version groups. A significant difference in psoas release procedures (psoas impingement) was seen with increasing femoral version. The mean follow-up period was 30 months (range, 18 to 47 months). Patient-reported functional outcomes were not statistically different among the groups. CONCLUSIONS: Patient-reported functional outcomes after hip arthroscopy for labral tears and FAI were not different based on femoral version in this population. Although some differences were observed regarding intraoperative findings, these also did not result in differences in patient outcomes reported at a mean follow-up of 2 years. LEVEL OF EVIDENCE: Level IV, therapeutic case series Notes: DA - 20150306 IS - 1526-3231 (Electronic) IS - 0749-8063 (Linking) LA - eng PT - Journal Article SB - IM

(159) Finnoff JT, Hall MM, Kyle K, Krause DA, Lai J, Smith J. Hip Strength and Knee Pain in High School Runners: A Prospective Study. PM and R 3 (9) ()(pp 792-801), 2011 Date of Publication: September 2011 2011;(9):792-801. Ref ID: 399 Abstract: Objective: To determine whether pre-injury hip muscle weakness is associated with the development of patellofemoral pain (PFP) in high school running athletes. Design: Prospective cohort study. Setting: Academic institution sports medicine center. Participants: High school running athletes. Methods: Baseline hip strength of high school running athletes was assessed at the beginning of the running season. Strength testing was repeated in athletes who developed PFP. Peak hip muscle strengths and strength ratios were compared between the injured and non-injured groups. Results: Six injuries occurred in 5 of the 98 subjects who completed the study. The baseline hip external-to-internal strength ratio was lower in injured than in uninjured subjects (P = .008). In the injured group, hip abduction and external rotation strengths decreased from pre-injury to post-injury (P = .002 and P = .01, respectively). Logistic regression analysis demonstrated that a greater baseline hip abduction strength (odds ratio = 5.35, 95% confidence interval [CI] 1.46-19.53; P < .01) and abduction-to-adduction strength ratio increased the risk of injury (odds ratio = 14.14, 95% CI 0.90-221.06; P = .05), and a greater pre-injury hip external-to-internal rotation strength ratio decreased the risk of injury (odds ratio < 0.01, 95% CI < .01, 0.44; P = .02). Conclusions: The findings of the current study suggest that stronger pre-injury hip abductors (particularly in relation to their hip adductors) and weaker pre-injury hip external rotators (particularly in relation to their hip internal rotators) are associated with the development of PFP. In addition, persons in whom PFP develops appear to lose hip abduction and external rotation strength when compared with their pre-injury strength. Finally, a higher hip external-to-internal rotation strength ratio may protect against the development of PFP. Â© 2011 American Academy of Physical Medicine and Rehabilitation Notes: DB - Embase UI - 2011538125 IN - (Finnoff) Dept. of Physical Medicine and Rehabilitation, Mayo Clinic College of Medicine, Mayo Clinic Sports Medicine Center, 200 1st St. SW, Rochester, MN, United States (Hall) Department of Physical Medicine and Rehabilitation, Mayo Clinic College of Medicine, Mayo Clinic Sports Medicine Center, Rochester, MN, United States (Kyle) Mayo Clinic Sports Medicine Center, Rochester, MN, United States (Krause) Department of Physical Medicine and Rehabilitation, Mayo Clinic College of Medicine, Rochester, MN, United States (Lai) Mayo Clinic Sports Medicine Center, Rochester, MN, United States (Smith) Department of Physical Medicine and Rehabilitation, Mayo Clinic College of Medicine, Mayo Clinic Sports Medicine Center, Rochester, MN, United States CP - United States LG - English PT - Journal: Article EM - 201100 DD - 20111007

(160) Fiz N, Sanchez M, Perez JC, Guadilla J, Delgado D, Azofra J et al. A less-invasive technique for capsular management during hip arthroscopy for femoroacetabular impingement. Arthroscopy Techniques 3 (4) ()(pp e439-e443), 2014 Date of Publication: 01 Aug 2014 2014;(4):e439-e443. Ref ID: 213 Abstract: The aim of this work is to describe a new arthroscopic technique for the treatment of femoroacetabular impingement that allows a complete articular joint view with maximum protection of the capsuloligamentous complex. This arthroscopic technique avoids injury to the capsuloligamentous complex, preventing the risk of postoperative instability. The diagnosis of femoroacetabular impingement was based on clinical and radiographic grounds. An alpha angle greater than 50degree was considered pathologic. In this technique, the use of intra-articular devices (retractors) allows us to separate the capsular tissue from the femoral head-neck junction and mobilize the capsule, achieving an adequate joint view without performing a capsulotomy and, consequently, avoiding the complications of capsular damage Notes: DB - Embase UI - 2014735966 IN - (Fiz, Sanchez, Perez, Guadilla, Azofra, Aizpurua) Arthroscopic Surgery Unit, Vithas San Jose Hospital, Vitoria-Gasteiz, Spain (Sanchez, Delgado) Arthroscopic Surgery Unit Research, Vithas San Jose Hospital, Vitoria-Gasteiz, Spain CP - Netherlands LG - English PT - Journal: Article EM - 201445 DD - 20141101

(161) Foucher KC, Schlink BR, Shakoor N, Wimmer MA. Sagittal plane hip motion reversals during walking are associated with disease severity and poorer function in subjects with hip osteoarthritis. J Biomech 2012; 45(8):1360-1365. Ref ID: 640 Abstract: A midstance reversal of sagittal plane hip motion during walking, or motion discontinuity (MD), has previously been observed in subjects with endstage hip osteoarthritis (OA) and in patients with femoroacetabular impingement. The goal of the present study was to evaluate whether this gait pattern is a marker of OA presence or radiographic severity by analyzing a large IRB approved motion analysis data repository. We also hypothesized that subjects with the MD would show more substantial gait impairments than those with normal hip motion. We identified 150 subjects with symptomatic unilateral hip OA and Kellgren-Lawrence OA severity data on file, and a control group of 159 asymptomatic subjects whose ages fell within 2 standard deviations of the mean OA group age. From the gait data, the MD was defined as a reversal in the slope of the hip flexion angle curve during midstance. Logistic regressions and general linear models were used to test the association between the MD and OA presence, OA severity and, other gait variables. 53% of OA subjects compared to 7.5% of controls had the MD (p<0.001); occurrence of the MD was associated with OA severity (p=0.009). Within the OA subject group, subjects with the MD had reduced dynamic range of motion, peak, extension, and internal rotation moments compared to those who did not (MANCOVA p </= 0.042) after controlling for walking speed. We concluded that sagittal plane motion reversals are indeed associated with OA presence and severity, and with more severe gait abnormalities in subjects with hip OA Notes: DA - 20120424 IS - 1873-2380 (Electronic) IS - 0021-9290 (Linking) LA - eng PT - Journal Article PT - Research Support, Non-U.S. Gov't SB - IM

(162) Fowler JR, Criner K, Craig MR. Prophylactic intramedullary fixation for bisphosphonate-related subtrochanteric stress fracture. Orthopedics 35 (6) ()(pp e954-e957), 2012 Date of Publication: June 2012 2012;(6):e954-e957. Ref ID: 356 Abstract: Bisphosphonates are the most widely used medication to treat osteoporosis. Recent reports have documented an association between chronic bisphosphonate use and femoral insufficiency fractures. This article describes an 84-year-old woman with a diagnosis of osteoporosis treated with bisphosphonate medications for 9 years. She presented with left groin pain, and magnetic resonance imaging revealed a subtrochanteric femoral stress fracture. Operative and nonoperative management was discussed with the patient, and she chose to undergo prophylactic intramedullary nailing of the left femur. Six months postoperatively, she was asymptomatic and ambulating without assistive devices. This article describes successful management of a bisphosphonate-related femoral insufficiency fracture. The presence of groin or thigh pain in a patient taking bisphosphonates should alert the physician to the possibility of insufficiency fracture of the proximal femur, and plain radiographs should be obtained. If these radiographs show lateral cortical thickening, consideration should be given to prophylactic intramedullary femoral nailing. The risks and benefits of prophylactic fixation vs conservative management should be discussed with the patient. A recent series showed a high failure rate with conservative treatment of these fractures. A dialogue with the primary care physician should be initiated to determine the necessity of bisphosphonate therapy, and, if deemed necessary, an alternative class of medications should be considered Notes: DB - Embase UI - 2012464620 IN - (Fowler, Criner, Craig) Department of Orthopaedics, Temple University Hospital, Outpatient Bldg., Zone B, 3401 N Broad St, Philadelphia, PA 19140, United States (Craig) Department of Orthopaedics, Abington Memorial Hospital, Abington, PA, United States CP - United States LG - English PT - Journal: Article EM - 201236 DD - 20120903

(163) Fraitzl CR, Kafer W, Nelitz M, Reichel H. Radiological evidence of femoroacetabular impingement in mild slipped capital femoral epiphysis: a mean follow-up of 14.4 years after pinning in situ. J Bone Joint Surg Br 2007; 89(12):1592-1596. Ref ID: 731 Abstract: Conventional treatment of mild slipped capital femoral epiphysis consists of fixation in situ with wires or screws. Recent contributions to the literature suggest that even a mild slip may lead to early damage of the acetabular labrum and adjacent cartilage by abutment of a prominent femoral metaphysis. It has been suggested that the appropriate treatment in mild slipped capital femoral epiphysis should not only prevent further slipping of the epiphysis, but also address potential femoroacetabular impingement by restoring the anatomy of the proximal femur. Between October 1984 and December 1995 we treated 16 patients for unilateral mild slipped capital femoral epiphysis by fixation in situ with Kirschner wires. In this study we have reviewed these patients for clinical and radiological evidence of femoroacetabular impingement. There was little clinical indication of impingement but radiological evaluation assessing the femoral head-neck ratio and measuring the Notzli alpha angle on the anteroposterior and cross-table radiographs showed significant alterations in the proximal femur. None of the affected hips had a normal head-neck ratio and the mean alpha angle was 86 degrees (55 degrees to 99 degrees ) and 55 degrees (40 degrees to 94 degrees ) on the anteroposterior and lateral cross-table radiographs, respectively. While our clinical data favours conventional treatment, our radiological findings are in support of restoring the anatomy of the proximal femur to avoid or delay the development of femoroacetabular impingement following mild slipped capital femoral epiphysis Notes: DA - 20071206 IS - 0301-620X (Print) IS - 0301-620X (Linking) LA - eng PT - Evaluation Studies PT - Journal Article SB - AIM SB - IM

(164) Frank RM, Lee S, Bush-Joseph CA, Kelly BT, Salata MJ, Nho SJ. Improved outcomes after hip arthroscopic surgery in patients undergoing T-capsulotomy with complete repair versus partial repair for femoroacetabular impingement: a comparative matched-pair analysis. Am J Sports Med 2014; 42(11):2634-2642. Ref ID: 562 Abstract: BACKGROUND: Hip capsular management after hip arthroscopic surgery for femoroacetabular impingement (FAI) is controversial. PURPOSE/HYPOTHESIS: To compare the clinical outcomes of patients undergoing hip arthroscopic surgery for FAI with T-capsulotomy with partial capsular repair (PR; closed vertical incision, open interportal incision) versus complete capsular repair (CR; full closure of both incisions). The hypothesis was that there would be improved clinical outcomes in patients undergoing CR compared with those undergoing PR. STUDY DESIGN: Cohort study; Level of evidence, 3. METHODS: Consecutive patients undergoing hip arthroscopic surgery for FAI by a single fellowship-trained surgeon from January 2011 to January 2012 were prospectively collected and analyzed. Inclusion criteria included all patients between ages 16 and 65 years with physical examination and radiographic findings consistent with symptomatic FAI, with a minimum 2-year follow-up. For analysis, patients were matched according to sex and age +/-2 years. Primary clinical outcomes were measured via the Hip Outcome Score Activities of Daily Living (HOS-ADL) and Sport-Specific (HOS-SS) subscales, the modified Harris Hip Score (mHHS), patient satisfaction (measured on a visual analog scale), and clinical improvement at baseline, 6 months, 1 year, and 2 years. Statistical analysis was performed utilizing Student paired and unpaired t tests, with P < .05 considered significant. RESULTS: A total of 64 patients were included in the study, with 32 patients (12 male, 20 female) in each group. The average follow-up was 29.9 +/- 2.6 months. There were no significant demographic differences between the groups. The CR group demonstrated significantly superior outcomes in the HOS-SS at 6 months (PR: 63.8 +/- 31.1 vs CR: 72.2 +/- 16.1; P = .039), 1 year (PR: 72.7 +/- 14.7 vs CR: 82.5 +/- 10.7; P = .006), and 2.5 years (PR: 83.6 +/- 9.6 vs CR: 87.3 +/- 8.3; P < .0001) after surgery. Patient satisfaction at final follow-up was significantly better in the CR group (PR: 8.4 +/- 1.0 vs CR: 8.6 +/- 1.1; P = .025). Both groups demonstrated significant improvements in the HOS-ADL (PR: 64.6 +/- 17.0 to 90.7 +/- 8.4 [P < .0001]; CR: 66.1 +/- 15.7 to 92.1 +/- 7.9 [P < .0001]) and HOS-SS (PR: 39.4 +/- 23.9 to 83.6 +/- 9.6 [P < .0001]; CR: 39.1 +/- 24.2 to 87.3 +/- 8.3 [P < .0001]) at final follow-up. There were no significant differences between the groups in the HOS-ADL at any time point. There were no significant differences in the mHHS between the groups at final follow-up (PR: 82.5 +/- 5.0 vs CR: 83.0 +/- 4.4; P = .364). The overall revision rate was 6.25%; all patients (n = 4) who required revision arthroscopic surgery were in the PR group (13% of 32 patients), while no patients in the CR group required revision surgery. CONCLUSION: While significant improvements were seen at 6 months, 1 year, and 2.5 years of follow-up regardless of the closure technique, patients who underwent CR of the hip capsule demonstrated superior sport-specific outcomes compared with those undergoing PR. There was a 13% revision rate in the PR group, but no patients in the CR group required revision surgery. While longer term outcome studies are needed to determine if these results are maintained over time, these data suggest improved outcomes after CR compared with PR at 2.5 years after hip arthroscopic surgery for FAI Notes: DA - 20141031 IS - 1552-3365 (Electronic) IS - 0363-5465 (Linking) LA - eng PT - Comparative Study PT - Journal Article SB - IM

(165) Fransen M, Agaliotis M, Bridgett L, MacKey MG. Hip and knee pain: Role of occupational factors. Best Practice and Research: Clinical Rheumatology 25 (1) ()(pp 81-101), 2011 Date of Publication: February 2011 2011;(1):81-101. Ref ID: 396 Abstract: Many people rely economically on occupations involving high loading of the hip or knee joints for lengthy periods, possibly placing them at increased risk of developing chronic pain in these joints. There is a growing body of evidence from large longitudinal cohort studies, case-control studies and population-based surveys that certain occupations, or having work involving considerable heavy lifting, kneeling or squatting, may be associated with increased risk of symptomatic hip or knee osteoarthritis and joint replacement surgery. Only a few studies have evaluated the effectiveness of specific workplace strategies to reduce this risk. Identifying modifiable workplace risk factors and implementing feasible and accessible preventative strategies will be of great public health significance in the next decade.Â© 2011 Elsevier Ltd. All rights reserved Notes: DB - Embase UI - 2011318477 IN - (Fransen, Agaliotis, Bridgett, MacKey) Clinical and Rehabilitation Sciences Research Group, Faculty of Health Sciences, University of Sydney, PO Box 170, Lidcombe, NSW 1825, Australia CP - United Kingdom LG - English PT - Journal: Article EM - 201100 DD - 20110617

(166) Freiberg A. Does a restricted hip joint range of motion influence the development of osteitis pubis in athletes? A systematic review. Physiotherapy (United Kingdom) Conference: World Physical Therapy 2011 Amsterdam Netherlands Conference Start: 20110620 Conference End: 20110623 Conference Publication: (var pagings) 97 ()(pp eS366-eS367), 2011 Date of Publication: June 2011 2011;(United Kingdom):eS366-eS367. Ref ID: 176 Abstract: Purpose: The purpose of this study was to review the literature systematically for trials about restrictions in the movement of the hip joint in athletes with Osteitis pubis. Relevance: Osteitis pubis is a non infectious inflammation of the symphysis and adductor muscle insertions. The disease affects mostly masculine athletes who play soccer, American football, ice hockey or rugby. The classical symptom is pain in the symphysis and the adductor muscles. The aetiology is unknown to date. Repetitive microtrauma, abnormal shear forces and an instability of the symphysis or the sacroilical joints are often described as aetiological factors. But only few trials regard the restricted hip joint range of motion (ROM) as one. Participants: No participants were required because this is a literature review. Methods: Trials with an aetiological study design were included. In a systematic, retrospective literature review the following databases were searched until February 2009: CINAHL, PubMed and Embase. The trials had to investigate the influence of a restriction hip joint range of motion (ROM) in athletes with osteitis pubis. Analysis: The author selected trials for inclusion, classified the evidence level according to the Oxford Centre for Evidence-based Medicine Levels of Evidence and investigated the methodological quality of each trial with the Critical Appraisal Skills Programme of the Public Health Resource Unit of the Oxford University. Results: A meta analysis was not possible due to the lack of information about the measurement methods in one of the trials. The athletes in the trial of Williams (1978) had an average internal rotation of 33.3degree (m= 33.3degree, sd = 7.02, n = 12). Verrall et al. (2005) showed an average internal rotation of 37.2degree (m= 37.2degree, sd = 10.6, n = 37). Asymptomatic athletes had a higher average internal rotation. The prospective study (Verrall et al., 2007) presented a smaller internal rotation of the dominant and non dominant leg in American football players with Osteitis pubis compared to healthy athletes (m(dominant leg) = 15.5degree, sd = 2.06; m(non dominant leg) = 15.5degree, sd = 1.32). The trials demonstrate a restricted internal rotation of the hip in athletes with osteitis pubis. According to Verrall et al. (2007) a limited hip joint ROM precedes athletic Osteitis pubis. Conclusions: A reduction in the hip joint ROM should be considered as an aetiological factor in athletes with Osteitis pubis. However there should be more evidence of high quality due to the fact that the three trials were only of moderate or good quality. Implications: A restriction in the movement of the hip joint should be regarded as one of the aetiological factors in Osteitis pubis. Enlarging the hip joint range of motion could help to prevent the development of Osteitis pubis in athletes Notes: DB - Embase UI - 71882673 LG - English PT - Journal: Conference Abstract EM - 201522 DD - 20150519

(167) Fukui S, Iwamoto N, Tsuji S, Umeda M, Nishino A, Nakashima Y et al. RS3PE syndrome with iliopsoas bursitis distinguished from an iliopsoas abscess using a CT-guided puncture. Internal Medicine 54 (13) ()(pp 1653-1656), 2015 Date of Publication: 01 Jul 2015 2015;(13):1653-1656. Ref ID: 163 Abstract: A 55-year-old man was diagnosed with remitting seronegative symmetrical synovitis with pitting edema (RS3PE) syndrome. Contrast-enhanced computed tomography for cancer screening showed a mass with lowdensity centers with an enhanced rim in the left iliopsoas muscle. We suspected an iliopsoas abscess and performed computed-tomography-guided puncture of the mass. Both Gram staining and the culture of the fluid were negative. We diagnosed the patient with RS3PE syndrome with iliopsoas bursitis and administered lowdose corticosteroids without antibiotics. The symptoms, including left hip pain, quickly disappeared following treatment. Clinicians should be aware that iliopsoas bursitis may resemble an iliopsoas abscess. As a result, it is important to make an accurate differential diagnosis Notes: DB - Embase UI - 2015180805 IN - (Fukui, Iwamoto, Tsuji, Umeda, Nishino, Nakashima, Suzuki, Horai, Koga, Kawashiri, Ichinose, Hirai, Tamai, Nakamura, Origuchi, Kawakami) Department of Immunology and Rheumatology, Nagasaki University, Graduate School of Biomedical Sciences, Japan (Kawashiri) Department of Public Health, Nagasaki University, Graduate School of Biomedical Sciences, Japan (Origuchi) Department of Rehabilitation Sciences, Nagasaki University, Graduate School of Biomedical Sciences, Japan CP - Japan LG - English PT - Journal: Article EM - 201530 DD - 20150715

(168) Ganz R, Leunig M, Leunig-Ganz K, Harris WH. The etiology of osteoarthritis of the hip: An integrated mechanical concept. Clinical Orthopaedics and Related Research 466 (2) ()(pp 264-272), 2008 Date of Publication: February 2008 2008;(2):264-272. Ref ID: 477 Abstract: The etiology of osteoarthritis of the hip has long been considered secondary (eg, to congenital or developmental deformities) or primary (presuming some underlying abnormality of articular cartilage). Recent information supports a hypothesis that so-called primary osteoarthritis is also secondary to subtle developmental abnormalities and the mechanism in these cases is femoroacetabular impingement rather than excessive contact stress. The most frequent location for femoroacetabular impingement is the anterosuperior rim area and the most critical motion is internal rotation of the hip in 90degree flexion. Two types of femoroacetabular impingement have been identified. Cam-type femoroacetabular impingement, more prevalent in young male patients, is caused by an offset pathomorphology between head and neck and produces an outside-in delamination of the acetabulum. Pincer-type femoroacetabular impingement, more prevalent in middle-aged women, is produced by a more linear impact between a local (retroversion of the acetabulum) or general overcoverage (coxa profunda/protrusio) of the acetabulum. The damage pattern is more restricted to the rim and the process of joint degeneration is slower. Most hips, however, show a mixed femoroacetabular impingement pattern with cam predominance. Surgical attempts to restore normal anatomy to avoid femoroacetabular impingement should be performed in the early stage before major cartilage damage is present. Level of Evidence: Level V, therapeutic study. See the Guidelines for Authors for a complete description of levels of evidence. Â© 2008 The Association of Bone and Joint Surgeons Notes: DB - Embase UI - 2008315328 IN - (Ganz, Leunig) University of Berne, Berne, Switzerland (Ganz) Department of Orthopaedics, Balgrist University Hospital, Zurich, Switzerland (Leunig) Hip Service, Department of Orthopaedics, Schulthess Clinic, Lengghalde 2, Zurich CH-8008, Switzerland (Leunig-Ganz) Maternity Department, Triemli City Hospital, Zurich, Switzerland (Harris) Harvard Medical School, Massachusetts General Hospital, Harris Orthopedic Biomechanics and Biomaterials Lab., Boston, MA, United States CP - United States LG - English PT - Journal: Conference Paper EM - 200800 DD - 20080723

(169) Garvey JF, Read JW, Turner A. Sportsman hernia: what can we do? Hernia 2010; 14(1):17-25. Ref ID: 694 Abstract: INTRODUCTION: Sportsman (sports) hernia is a medially located bulge in the posterior wall of the inguinal canal that is common in football players. About 90% of cases occur in males. The injury is also found in the general population. CLINICAL PRESENTATION: The presenting symptom is chronic groin pain which develops during exercise, aggravated by sudden movements, accompanied by subtle physical examination findings and a medial inguinal bulge on ultrasound. Pain persists after a game, abates during a period of lay-off, but returns on the resumption of sport. Frequently, sports hernia is one component of a more extensive pattern of injury known as 'groin disruption injury' consisting of osteitis pubis, conjoint tendinopathy, adductor tendinopathy and obturator nerve entrapment. RISK FACTORS: Certain risk factors have been identified, including reduced hip range of motion and poor muscle balance around the pelvis, limb length discrepancy and pelvic instability. The suggested aetiology of the injury is repetitive athletic loading of the symphysis pubis disc, leading to accelerated disc degeneration with consequent pelvic instability and vulnerability to micro-fracturing along the pubic osteochondral junction, periosteal stripping of the pubic ligaments and para-symphyseal tendon tears, causing tendon dysfunction. RADIOLOGY: Diagnostic imaging includes an erect pelvic radiograph (X-ray) with flamingo stress views of the symphysis pubis, real-time ultrasound and, occasionally, computed tomography (CT) scanning and magnetic resonance imaging (MRI), but seldom contrast herniography. Other imaging tests occasionally performed can include nuclear bone scan, limb leg measurement and test injections of local anaesthetic/corticosteroid. PREVENTION AND TREATMENT: The injury may be prevented by the detection and monitoring of players at risk and by correcting significant limb length inequality. Groin reconstruction operation consists of a Maloney darn hernia repair technique, repair of the conjoint tendon, transverse adductor tenotomy and obturator nerve release. Rehabilitation involves core stabilisation exercises and the maintenance of muscle control and strength around the pelvis. OUTCOME: Using this regimen of groin reconstruction and post-operative rehabilitation, a player would be anticipated to return to their pre-injury level of activity approximately 3 months after surgery Notes: DA - 20100216 IS - 1248-9204 (Electronic) IS - 1248-9204 (Linking) LA - eng PT - Journal Article SB - IM

(170) Gebhart JJ, Streit JJ, Bedi A, Bush-Joseph CA, Nho SJ, Salata MJ. Correlation of pelvic incidence with cam and pincer lesions. Am J Sports Med 2014; 42(11):2649-2653. Ref ID: 564 Abstract: BACKGROUND: The sacropelvic parameter of pelvic incidence (PI) is a position-independent anatomic parameter that regulates lumbar lordosis and pelvic orientation. While it has been extensively studied in relation to spine pathology, only a single study has correlated PI with femoroacetabular impingement (FAI). HYPOTHESIS: Decreased PI would be associated with an increased prevalence of cam and pincer lesions. STUDY DESIGN: Controlled laboratory study. METHODS: Measurements of the acetabulum, proximal femur, and sacropelvis were made bilaterally on 40 cadaveric specimens, for a total of 80 hips. Twenty specimens had the presence of bilateral cam deformities (alpha angle >55 degrees ), and 20 age- and sex-matched specimens had bilateral normal hips. Pincer lesions were defined as an anteversion <15 degrees . Pelvic incidence and acetabular version were measured using standardized lateral photographs and a goniometer, respectively. Independent-samples t tests were performed to evaluate for differences in measured parameters between groups. RESULTS: The mean PI was 43.1 degrees +/- 8.6 degrees for hips with a cam lesion and 47.7 degrees +/- 9.3 degrees for normal hips, demonstrating a significant association between decreased PI and the presence of a cam lesion (P = .02). The mean version of acetabula with pincer lesions (n = 28) was 11.4 degrees +/- 2.5 degrees , and the mean version of normal acetabula (n = 52) was 20.1 degrees +/- 3.8 degrees . The mean PI of hips with pincer lesions was 42.5 degrees +/- 8.5 degrees , significantly less than that of normal hips, 47.0 degrees +/- 9.2 degrees (P = .04). CONCLUSION: This study supports a recent study that suggested patients with pincer impingement have a smaller PI than the healthy population, and it is the first to demonstrate a significant association between decreased PI and cam-type femoral deformity. Based on results of this study, further clinical study of the effects of pelvic geometry on FAI is warranted. CLINICAL RELEVANCE: While the study results do not prove a causal relationship, it is theorized that the restriction of range of motion and biomechanical adaptations of the pelvis around the hip joints resulting from a smaller PI may affect hip development and FAI. The influence of mechanical factors beyond the hip joint in the development of FAI should be considered by clinicians Notes: DA - 20141031 IS - 1552-3365 (Electronic) IS - 0363-5465 (Linking) LA - eng PT - Journal Article SB - IM

(171) Geiser CF, O'Connor KM, Earl JE. Effects of isolated hip abductor fatigue on frontal plane knee mechanics. Med Sci Sports Exerc 2010; 42(3):535-545. Ref ID: 695 Abstract: PURPOSE: Anterior cruciate ligament injuries and patellofemoral pain syndrome are both common and significant injuries to the knee that have been associated with hip weakness. Prospective studies have linked the risk of experiencing either injury to alterations in the frontal plane knee angle and moment during activity. These components of knee mechanics are theorized to be affected by hip abductor weakness. The purpose of this study was to identify the effects of isolated hip abductor fatigue-induced weakness on lower extremity kinematics and kinetics in recreationally active women. METHODS: Twenty participants performed cut, jump, and run tasks off a raised platform while three-dimensional motion analysis data were collected.Participants then performed an isolated hip abductor fatigue protocol in side lying against isokinetic resistance, followed immediately by repeated biomechanical data collection. Separate repeated-measures ANOVA (P G 0.05) were used for each dependent variable. RESULTS: After the hip fatigue protocol, regardless of task, the knee angle at initial ground contact was more adducted (pre = 0.7 degrees +/- 3.4 degrees, post = 1.2 degrees +/- 3.9 degrees, F(1,19) = 5.3, P = 0.032), the knee underwent greater range of motion into abduction (pre = 0.7 degrees +/- 1.5 degrees, post = 2.1 degrees +/- 1.6 degrees, F(1,19) = 73.2, P < 0.001), and there was a greater internal knee adductor moment (pre = -2.6 +/- 13.3 N x m, post = 4.7 +/- 14.1 N x m, F(1,19) = 41.0, P < 0.001) during the weight acceptance phase of stance. CONCLUSIONS: This study demonstrates that simulated hip abductor weakness causes small alterations of frontal plane knee mechanics. Although some of these alterations occurred in directions associated with increased risk of knee injury, changes were small in magnitude, and the effect of these small changes on knee injury risk is unknown Notes: DA - 20100302 IS - 1530-0315 (Electronic) IS - 0195-9131 (Linking) LA - eng PT - Journal Article PT - Research Support, Non-U.S. Gov't SB - IM SB - S

(172) Gellert C. Exploring hip pain: Femoroacetabular Impingement. IDEA Fitness Journal 2012; 9(2):42-50. Ref ID: 24 Notes: IS - 2

(173) Genovese E, Spiga S, Vinci V, Aliprandi A, Di Pietto F, Coppolino F et al. Femoroacetabular impingement: role of imaging. Musculoskelet Surg 2013; 97 Suppl 2:S117-S126. Ref ID: 601 Abstract: The femoroacetabular impingement (FAI) is an impingement characterized by repetitive abutment between the femur and the acetabular rim during hip motion due to loss of joint clearance (Imam and Khanduja in Int Orthop 35(10):1427-1435, 2011; James et al. in AJR Am J Roentgenol 187(6):1412-1419, 2006). Femoroacetabular impingement (FAI) can be classified as either cam or pincer type, and it can be differentiated on the basis of a predominance of either a femoral or an acetabular abnormality (Pfirrmann et al. in Radiology 244(2):626, 2007; Ganz et al. in Clin Orthop Relat Res 466(2):264-272, 2008). In cases of cam FAI, the nonspherical shape of the femoral head at the femoral head-neck junction and reduced depth of the femoral waist lead to abutment of the femoral head-neck junction against the acetabular rim. In cases of pincer FAI, acetabular overcoverage limits the range of motion and leads to a conflict between the acetabulum and the femur. The most important role of preoperative MR evaluation in patients affected by FAI is the accurate assessment of the damage's extension Notes: DA - 20130816 IS - 2035-5114 (Electronic) IS - 2035-5114 (Linking) LA - eng PT - Journal Article PT - Review SB - IM

(174) Geoghegan JM, Geutjens GG, Downing ND, Colclough K, King RJ. Hip extension strength following hamstring tendon harvest for ACL reconstruction. Knee 14 (5) ()(pp 352-356), 2007 Date of Publication: October 2007 2007;(5):352-356. Ref ID: 488 Abstract: Hamstring autograft harvest for ACL reconstruction may have an effect on hip extension strength and this may be important especially in sports that involve high speed running such as soccer, rugby, American football and the sprint disciplines of track and field. This aspect of hamstring tendon harvesting has not been looked at before. We have performed a non-randomised prospective case control study comparing isokinetic hip extension strength following four strand semitendinosus and gracilis tendons (4SHS) and bone-patellar tendon-bone (BPTB) autografts in ACL reconstruction. Isokinetic hip extension was assessed at 3 and 12 months post-operatively using a Kin-Com machine at a speed of 30degree per second. Three months post-operatively there was a significant decrease (p < 0.05) in the peak force of concentric hip extension in the 4SHS group. There was no evidence that hip extension is weaker following ACL reconstruction with 4SHS tendon autograft than ACL reconstruction with BPTB autograft at 12 months post-operatively. We find no contra-indication to the use of 4SHS tendon autografts in ACL reconstruction in patients who wish to preserve hip extension strength for their sporting activities. Â© 2007 Elsevier B.V. All rights reserved Notes: DB - Embase UI - 2007435729 IN - (Geoghegan, Geutjens, Colclough, King) Derbyshire Royal Infirmary, Derby, United Kingdom (Downing) Queen's Medical Centre, Nottingham, United Kingdom CP - Netherlands LG - English PT - Journal: Article EM - 200700 DD - 20070918

(175) Geraci MC, Jr., Brown W. Evidence-based treatment of hip and pelvic injuries in runners. Phys Med Rehabil Clin N Am 2005; 16(3):711-747. Ref ID: 751 Abstract: The runner is especially at risk for development of injury to the hip and pelvis secondary to chronic repetitive microtrauma. The key to treatment is establishing complete and accurate diagnosis, and, in particular, identifying the functional biomechanical deficits in the kinetic chain that contribute to this repetitive microtrauma. A long-term successful outcome and prevention of reinjury are more likely if the focus of rehabilitation is on the restoration of the functional kinetic chain, rather than on a specific injured tissue. For example, the typical treatment of "iliotibial band syndrome" is a stretching protocol that frequently is unsuccessful in the long-term improvement of symptoms. A functional biomechanical approach might identify that the injured runner has lack of calcaneal eversion and a structurally rigid supinated foot. These functional biomechanical deficits would lead to inadequate internal rotation of the tibia and femur and result in inhibition or decreased recruitment of the gluteal muscles, in particular the gluteus medius. Restoring pronation throughout the lower extremity would require joint play techniques or functional joint mobilizations for the foot and ankle. In addition, a running shoe with a cushioned heel may be necessary to promote pronation and to attenuate shock. Exercises that integrate foot and hip function, including balance reaches, lunges and step-downs, are prescribed to stimulate the gluteus medius and other gluteals in positions that simulate running. Activities that are done in this manner activate the entire functional kinetic chain of muscles and joints. The nonoperative sports medicine specialist, in particular the physiatrist and physical therapist, are in an excellent position to integrate treatment of the entire functional kinetic chain through a thorough biomechanical evaluation and comprehensive rehabilitation of the injured runner. Additional training in the areas of biomechanical evaluation and functional biomechanical deficits should be sought, because residency and even many fellowship-trained programs often overlook these important areas. Finally, the injured runner is best taken care of in a setting in which different sports medicine specialists are available and work well as a team. No one sports medicine specialist can provide all of the needs to the injured runner Notes: DA - 20050711 IS - 1047-9651 (Print) IS - 1047-9651 (Linking) LA - eng PT - Journal Article PT - Review SB - IM

(176) Gerdesmeyer L, Gollwitzer H, Bader R, Rudert M. Surgical approaches in hip resurfacing. [German]. Orthopade 37 (7) ()(pp 650-658), 2008 Date of Publication: July 2008 2008;(7):650-658. Ref ID: 481 Abstract: A large variety of approaches are described for standard total hip arthroplasty. All of them are technically based on three different approaches: anterior, anterolateral, or posterior. In recent hip resurfacing, the posterior approach is common, due to large instruments used to ream the femur. Better exposure of the acetabulum is achieved by the posterior approach, but this technique puts the important extraosseous blood supply to the femoral head at risk. The anterior approach preserves blood supply and gives better options to treat the femoroacetabular impingement. If specific surgical modifications and instruments designed for minimally invasive surgery are used, hip resurfacing can be performed with an anterolateral technique. Excellent functional and clinical outcomes have been reported after all three approaches. Â© 2008 Springer Medizin Verlag Notes: DB - Embase UI - 2008362972 IN - (Gerdesmeyer) Department fur Endoprothetik und Wirbelsaulenchirurgie, Mare-Klinikum, Kiel-Kronshagen, Germany (Gollwitzer, Rudert) Klinik fur Orthopadie und Unfallchirurgie, Technische Universitat Munchen, Munchen, Germany (Bader) Klinik fur Orthopadie, Universitat, Rostock, Germany (Gerdesmeyer) Department fur Endoprothetik und Wirbelsaulenchirurgie, Mare-Klinikum, Eckernforder Strase 219, 24119 Kiel-Kronshagen, Germany CP - Germany OT - Zugangswege zum oberflachenersatz am huftgelenk LG - German PT - Journal: Article EM - 200800 DD - 20080818

(177) Giannini S, Chiarello E, Cadossi M, Tedesco G. Is poli-carbonate - Urethane on metal a viable solution for the treatment of femoral neck fractures in severe osteoporotic elderly patients? Osteoporosis International Conference: IOF World Congress on Osteoporosis and 10th European Congress on Clinical and Economic Aspects of Osteoporosis and Osteoarthritis, IOF WCO - ECCEO 10 Florence Italy Conference Start: 20100505 Conference End: 201005 2010;(var.pagings):S173-S174. Ref ID: 449 Abstract: Aims: The purpose of this clinical study was to evaluate the efficacy of a new acetabular cup made in Poly-Carbonate-Urethane (PCU) coupled with large femoral metal head in elderly patients affected by Displaced Intracapsular Femoral Neck Fracture (DIF-NF) and DXA diagnosis of osteoporosis. Methods: Between September 2006 and January 2010, 30 patients were enrolled in the study; six patients that missed the Follow-Up (FU) were excluded from the analysis. Inclusion criteria were: age between 65 and 90, DIFNF type 3 and 4, according to Garden's classification requiring hip joint replacement, T-score < -2.5 SD, prior ambulating status. Exclusion criteria were: patients unable to understand and sign the informed consent and patients with malignant tumor. An uncemented tapered stem was implanted in all patients. Outcomes included: Harris Hip Score (HHS), Range Of Motion (ROM) and radiological assessment. Results: Six males, 18 females were evaluated, mean age was 80.5 (range 65 to 89). The main T-score, was -2.9 (range -2.5 to -3.8). Clinical assessment was performed at 1, 3, 6 and at 12 months following surgery, afterward once every year. Four patients completed 24 months follow-up (FU), 14 patients completed 12 months FU, 5 patients completed 6 months FU and one 3 months FU. The latest HHS was excellent in 8 patients; good in 8; fair in 4 and poor in 4; 19 patients had no hip pain. five patients at 6 months FU had some groin pain. (HHS pain sub-score: 30 out of 44, with the 44 being no pain). No radiolucent areas were found. The ROM in all operated hips was similar to the contralateral hip. (Graph presented). Conclusions: Standard implants are made of stiff materials, such as metals, ceramics or polymers. However, they failed to provide the significant function of shock-absorption, as provided naturally by cartilage. The direct contact between rigid implants and acetabular bone, is suspected to be the major cause of surgical failures of current devices. The PCU cup reduces the pressure between the metal head and acetabular bone. Moreover the large femoral head (sizes 44-50mm) reduces the risk of dislocation or subluxation. The potential advantages of PCU pliable cup are the minimal bone removal and the preservation of acetabular bone stock over time thus avoiding acetabular protrusion. Our preliminary results in elderly osteoporotic patients demonstrate safety of the device and good clinical results, nevertheless longer FU is necessary Notes: DB - Embase UI - 70225970 IN - (Giannini, Chiarello, Cadossi, Tedesco) Instituteo Ortopedico Rizzoli, Bologna University, Bologna, Italy LG - English PT - Journal: Conference Abstract EM - 200900 DD - 20100804

(178) Girard J. Femoral head diameter considerations for primary total hip arthroplasty. Orthop Traumatol Surg Res 2015; 101(1 Suppl):S25-S29. Ref ID: 545 Abstract: The configuration of total hip arthroplasty (THA) implants has constantly evolved since they were first introduced. One of the key components of THA design is the diameter of the prosthetic femoral head. It has been well established that the risk of dislocation is lower as the head diameter increases. But head diameter impacts other variables beyond joint stability: wear, cam-type impingement, range of motion, restoration of biomechanics, proprioception and groin pain. The introduction of highly cross-linked polyethylene and hard-on-hard bearings has allowed surgeons to implant large-diameter heads that almost completely eliminate the risk of dislocation. But as a result, cup liners have become thinner. With femoral head diameters up to 36 mm, the improvement in joint range of motion, delay in cam-type impingement and reduction in dislocation risk have been clearly demonstrated. Conversely, large-diameter heads do not provide any additional improvements. If an "ecologically sound" approach to hip replacement is embraced (e.g. keeping the native femoral head diameter), hip resurfacing with a metal-on-metal bearing must be carried out. The reliability of large-diameter femoral heads in the longer term is questionable. Large-diameter ceramic-on-ceramic bearings may be plagued by the same problems as metal-on-metal bearings: groin pain, squeaking, increased stiffness, irregular lubrication, acetabular loosening and notable friction at the Morse taper. These possibilities require us to be extra careful when using femoral heads with a diameter greater than 36 mm Notes: DA - 20150210 IS - 1877-0568 (Electronic) IS - 1877-0568 (Linking) LA - eng PT - Journal Article PT - Review SB - IM

(179) Gollwitzer H, Hapfelmeier A, Pinkas D. Clinical and radiologic risk factors of acetabular chondral damage in femoroacetabular impingement syndrome. Arthroscopy - Journal of Arthroscopic and Related Surgery Conference: Annual Scientific Meeting of the International Society for Hip Arthroscopy 2013, ISHA 2013 Munich Germany Conference Start: 20131010 Conference End: 20131012 Conference Publication: 2013;(var.pagings):e212-e213. Ref ID: 267 Abstract: Objectives: Deformities suggestive of femoroacetabular impingement syndrome (FAI) are common in young adults. Since non-invasive measures like MRI provide only limited accuracy to appropriately predict acetabular cartilage damage, valid parameters indicating patients at risk to develop significant chondral defects and osteoarthritis are urgently warranted. Both reduced internal rotation and increased alpha angle have been previously shown to be associated with an increased risk of acetabular chondral injury. The objective of the present study was to investigate the association between various clinical and radiographic parameters and the severity of acetabular cartilage damage. Methods: A total of 320 consecutive hip arthroscopies performed by a single surgeon were retrospectively reviewed. Subjects were included in the study if arthroscopic surgery was performed to correct deformities causing FAI. The following exclusion criteria were defined: previous surgery, intra-articular comorbidities (e.g. synovial chondromatosis), other prearthritic deformities (e.g. significant hip dysplasia), systemic inflammatory and musculoskeletal disease, post-traumatic cartilage damage, and insufficient joint distraction to assess the central compartment. Clinical data as well as X-ray and MRI parameters were recorded. The degree of cartilage damage was classified according to Beck et al. distinguishing (0) normal cartilage; (1) softening, surface roughening, fibrillation; (2) loss of fixation to subchondral bone, carpet phenomenon; (3) delamination, frayed edges, flap; and (4) full-thickness defects. Furthermore, the distance of the damaged cartilage extending from the chondrolabral junction to the central fossa was classified as follows: (0) no cartilage damage, (1) = 0.5 cm, (2) >0.5- 1.0 cm, (3) >1.0-1.5 cm, (4) >1.5-2.0 cm, (5) >2.0 cm. Results: 193 hips of 157 patients (50 women, 107 men) with an average age of 34 years (range, 17-67) met the inclusion criteria. Proportional odds logistic regression analysis revealed the following risk factors to be significantly associated with both a higher degree (p<0.05) as well as a larger size (p<0.05) of acetabular chondral damage: male gender, higher age at the time of surgery, reduced (internal) rotation, cam-type deformity, pistol grip deformity, positive horizontal growth plate sign, larger alpha angle, larger 1/2 radial height/radius ratio, smaller femoral head-neck offset, and larger acetabular depth. Regression analysis failed to demonstrate a significant association between cartilage damage and duration of symptoms, moderate coxa vara or coxa valga, center edge angle, cross-over sign, ischial spine sign, coxa profunda, prominent posterior wall, linear indentation sign, herniation pits, os acetabuli, and epiphyseal torsion angle. Conclusions: Our study provides important information on risk factors predicting more severe cartilage injury in FAI. The results might help to identify those patients at higher risk to develop severe chondral damage and osteoarthritis Notes: DB - Embase UI - 71271408 IN - (Gollwitzer, Hapfelmeier, Pinkas) Germany LG - English PT - Journal: Conference Abstract EM - 201401 DD - 20131227

(180) Goost H, Kabir K, Wirtz D, Rohrig H, Burger C, Weber O. [Bilateral femoral neck fracture after seizure]. Z Orthop Unfall 2009; 147(5):567-569. Ref ID: 700 Abstract: Femoral neck fractures after seizure are rare. This injury can easily be underdiagnosed due to generalised, musculoskeletal pain after seizure. In case of persisting groin pain and limited range of motion X-rays are indicated. Within the first 6 hours after the trauma a joint-preserving therapy is possible. After a delayed diagnosis total hip arthroplasty is necessary. As the result of prolonged intra-articular haematoma the incidence of a femoral head necrosis increases. When choosing the implant, an elevated risk of joint dislocation should be considered Notes: DA - 20091006 IS - 1864-6697 (Print) IS - 1864-6697 (Linking) LA - ger PT - Case Reports PT - English Abstract PT - Journal Article RN - 0 (Anticonvulsants) SB - IM

(181) Gorgey AS, Chiodo AE, Zemper ED, Hornyak JE, Rodriguez GM, Gater DR. Original contribution: Relationship of spasticity to soft tissue body composition and the metabolic profile in persons with chronic motor complete spinal cord injury. Journal of Spinal Cord Medicine 33 (1) ()(pp 6-15), 2010 Date of Publication: 2010 2010;(1):6-15. Ref ID: 431 Abstract: Background/Objective: To determine the effects of spasticity on anthropometrics, body composition (fat mass [FM] and fat-free mass [FFM]), and metabolic profile (energy expenditure, plasma glucose, insulin concentration, and lipid panel) in individuals with motor complete spinal cord injury (SCI). Methods: Ten individuals with chronic motor complete SCI (age, 33 +/-7 years; BMI, 24 +/-4 kg/m<sup>2</sup>; level of injury, C6-T11; American Spinal Injury Association A and B) underwent waist and abdominal circumferences to measure trunk adiposity. After the first visit, the participants were admitted to the general clinical research center for body composition (FFM and FM) assessment using dual energy x-ray absorptiometry. After overnight fasting, resting metabolic rate (RMR) and metabolic profile (plasma glucose, insulin, and lipid profile) were measured. Spasticity of the hip, knee, and ankle flexors and extensors was measured at 6 time points over 24 hours using the Modified Ashworth Scale. Results: Knee extensor spasticity was negatively correlated to abdominal circumferences (r = -0.66, P = 0.038). After accounting for leg or total FFM, spasticity was negatively related to abdominal circumference (r = -0.67, P = 0.03). Knee extensor spasticity was associated with greater total %FFM (r = 0.64; P = 0.048), lower %FM (r = -0.66; P = 0.03), and lower FM to FFM ratio. Increased FFM (kg) was associated with higher RMR (r = 0.89; P = 0.0001 ). Finally, spasticity may indirectly influence glucose homeostasis and lipid profile by maintaining FFM (r = -0.5 to -0.8, P < 0.001). Conclusion: Significant relationships were noted between spasticity and variables of body composition and metabolic profile in persons with chronic motor complete SCI, suggesting that spasticity may play a role in the defense against deterioration in these variables years after injury. The exact mechanism is yet to be determined. Â© 2010 by the American Paraplegia Society Notes: DB - Embase UI - 2010258445 IN - (Gorgey, Gater) Spinal Cord Disorders Service, Hunter Holmes McGuire VA Medical Center, 1201 Broad Rock Boulevard, Richmond, VA 23249, United States (Gorgey, Chiodo, Zemper, Hornyak, Rodriguez) Department of Physical Medicine and Rehabilitation, University of Michigan, Ann Arbor, MI, United States (Gater) Department of Physical Medicine and Rehabilitation, Virginia Commonwealth University, Richmond, VA, United States CP - United States LG - English PT - Journal: Article EM - 201000 DD - 20100527

(182) Graham HK, Boyd R, Carlin JB, Dobson F, Lowe K, Nattrass G et al. Does botulinum toxin a combined with bracing prevent hip displacement in children with cerebral palsy and "hips at risk"? A randomized, controlled trial. J Bone Joint Surg Am 2008; 90(1):23-33. Ref ID: 729 Abstract: BACKGROUND: Cerebral palsy is the most common cause of childhood physical disability in developed countries, affecting two children per 1000 live births. Hip displacement affects about one-third of children with cerebral palsy and may result in pain, deformity, and impaired function. The prevention of hip displacement has not been studied in a randomized trial as far as we know. METHODS: A randomized, controlled trial was conducted to examine the effect of intramuscular injections of botulinum toxin A combined with use of a variable hip abduction brace on the progression of hip displacement in children with cerebral palsy. The patients in the treatment group received injections of botulinum toxin A to the adductor and hamstring muscles every six months for three years and were prescribed a hip abduction brace to be worn for six hours per day. In the control group, no hip bracing was used nor were injections performed. The primary outcome measure was hip displacement from the acetabulum as determined by serial measurements of the migration percentage. RESULTS: Ninety children with bilateral cerebral palsy and so-called hips at risk (a migration percentage of >10% but <40%) were entered into the study. Fifty-nine patients were boys, and the mean age was three years. Progressive hip displacement, as determined by serial measurements of the migration percentage, was found in both the treatment and control groups. The rate of hip displacement was reduced in the treatment group by 1.4% per year (95% confidence interval, -0.6% to 3.4%; p = 0.16) when weighted for the uncertainty in rates due to the differing numbers of migration percentage measurements per subject. CONCLUSIONS: There may be a small treatment benefit for the combined intervention of intramuscular injection of botulinum toxin A and abduction hip bracing in the management of spastic hip displacement in children with cerebral palsy. However, progressive hip displacement continued to occur in the treatment group, and our data do not support recommending this treatment Notes: DA - 20080103 IS - 1535-1386 (Electronic) LA - eng PT - Clinical Trial, Phase III PT - Journal Article PT - Multicenter Study PT - Randomized Controlled Trial PT - Research Support, Non-U.S. Gov't RN - EC 3.4.24.69 (Botulinum Toxins, Type A) SB - AIM SB - IM

(183) Graves ML, Mast JW. Femoroacetabular impingement: do outcomes reliably improve with surgical dislocations? Clin Orthop Relat Res 2009; 467(3):717-723. Ref ID: 718 Abstract: Femoroacetabular impingement is a motion-based concept of conflict that occurs secondary to morphologic abnormalities of the proximal femur and/or acetabulum. Creating impingement-free motion through restoration of normal morphology serves as the goal of joint-preserving procedures. We retrospectively reviewed the short-term functional and radiographic outcomes of 46 patients (48 hips) with femoroacetabular impingement treated with a surgical dislocation and restoration of offset. The average Merle D'Aubigne-Postel score improved from a preoperative of 13 (range, 7-16 +/- 1.7) to a postoperative score of 16.8 (range, 12-18 +/- 1.3). Creating impingement-free motion via a surgical dislocation improves symptoms in patients with limited radiographic signs of arthritis who are experiencing impingement-related hip pain Notes: DA - 20090204 IS - 1528-1132 (Electronic) IS - 0009-921X (Linking) LA - eng PT - Journal Article SB - AIM SB - IM

(184) Griffee S, Sellon JL. Exertional thigh pain in a competitive recreational runner. Clinical Journal of Sport Medicine Conference: 23rd Annual Meeting of the American Medical Society for Sports Medicine New Orleans, LA United States Conference Start: 20140405 Conference End: 20140409 Conference Publication: (var pagings) 24 (2) ()(pp 2014;(var.pagings):e11-e12. Ref ID: 220 Abstract: History: A 44-year-old recreational competitive runner presented to sports medicine clinic with exertional anterior thigh pain. Three years prior, he developed anterior thigh pain during a 5k race. He described a relatively rapid onset of severe, left mid anterior thigh pain. The pain resolved within 30 seconds of stopping running. Over the past several years, he described pain recurrence during running with increasing frequency. Initially, the pain occurred only at about a 5:30 per mile running pace, but at the time of presentation, symptoms were provoked at about 7:30 per mile pace. He associated the pain with running at high speed, long duration, or hill running. The pain never occurred at rest. He denied distal leg pain, paresthesia, or weakness. Other than mild hypercholesterolemia, the patient had no known risk factors for peripheral vascular disease. Physical Examination: General: Fit-appearing, male in no acute distress. Skin: Normal in the left lower limb. Vessels: Toes were warm and appear well perfused bilaterally. No lower limb edema. Slightly decreased dorsalis pedis pulse on the left side compared to the right. Pulses did not change with active plantarflexion or passive dorsiflexion. Neurologic: Normal gait. Mild dynamic valgus knee instability on partial single leg squats, but otherwise normal strength and muscle stretch reflexes in the bilateral lower limbs. Straight leg raise and femoral nerve stretch test negative for radicular symptoms. Left thigh: No muscle atrophy noted. No tenderness to palpation or masses palpated. Symmetric hip flexor tightness with Ely's test; otherwise normal hip range of motion. Negative fulcrum, anterior impingement, FABER, logroll, and Stinchfield tests. Knees: Full non-painful knee range of motion bilaterally. Knee ligaments stable in all planes. No tenderness about the knees. Differential Diagnosis: Vascular claudication; Quadriceps muscle hernia; Quadriceps strain; L2/L3/L4 radiculopathy; Femoroacetabular impingement; Psoas tendinopathy. Tests & Results: Left Hip Radiographs: Cam type femoral head deformity with preserved hip joint. MRI Left Thigh: Normal-no evidence of quadriceps muscle hernia or injury. Left Hip MR Arthrogram: Small anterosuperior labral tear; otherwise unremarkable. Ankle Brachial Indices: Left: Rest 1.19; Post-exercise 0.53 (1-min), 0.62 (3-min), 0.79 (5-min). Negative popliteal artery entrapment maneuvers. Right: Rest 1.04; Post-exercise 0.81 (1-min), 0.93 (3-min), 1.00 (5-min). Doppler Ultrasound: Left common femoral artery showed post-exercise biphasic waveforms. Otherwise normal. CT Angiogram: Subtle narrowing of left external iliac artery. Final/Working Diagnosis: External iliac artery endofibrosis (EIAE)- Although EIAE is a common cause for anterior thigh and leg pain in cyclists, it is also important to consider this diagnosis in running-related lower limb pain. Maree et al (Vasc Med 2007) reported on a similar case of EIAE in a runner with predominantly anterior thigh pain. It is possible that runners with this condition may be more likely to manifest symptoms in the thigh. Further reports of EIAE in runners will help clarify unique clinical features. Treatment: The patient was referred to Vascular Medicine for management. His arterial lesion was not amenable to endovascular treatment. He was offered conservative management (running modification) versus surgical revascularization. Outcome: Given the invasive nature of the procedure, the patient declined surgical intervention. Return to Activity and Follow-Up: The patient resumed moderate-intensity, sub-symptom threshold, recreational running. He has discontinued competitive running Notes: DB - Embase UI - 71702981 IN - (Griffee, Sellon) Mayo Clinic, Rochester, MN, United States LG - English PT - Journal: Conference Abstract EM - 201450 DD - 20141204

(185) Grishkevich VM. Postburn perineal obliteration: Elimination of perineal, inguinal, and perianal contractures with the groin flap. Journal of Burn Care and Research 31 (5) ()(pp 786-790), 2010 Date of Publication: September-October 2010 2010;(5):786-790. Ref ID: 439 Abstract: Deep burns of the perineum result in perineal obliteration, hip adduction contracture, and limitation of hip range of motion. Bodily hygiene becomes difficult to maintain. Perineal obliteration is often combined with inguinal and perianal contractures and genitalia injury. These factors present a challenge for the surgeon. The extreme scar surface deficit and the fold absence in the perineal region do not allow contracture elimination with local tissues. As skin grafts shrink, success can be achieved only by using pedicled or free flaps. The groin flap is an excellent tissue for simultaneous perineal, inguinal, and anal reconstruction. In cases involving both perineal and inguinal contractures, two groin flaps can be used simultaneously. The groin flap has steady axis blood circulation that prevents postoperative complications. The donor wound is primarily closed or partially covered with superficial inferior epigastric artery flap (bilobed flap). Corrective procedure is required for "dog-ear" elimination. In children, the flap continues to grow, thus preventing contracture recurrence. Good results have been achieved in four operated patients. This allows one to make the following conclusion: In cases in which the abdominal wall is healthy or not severely injured by scars, groin flap plasty can be considered as a preferable technique for obliterated perineum and multiple perineo-inguino-anal reconstruction in burned adult and pediatric patients. Â© 2010 by the American Burn Association Notes: DB - Embase UI - 2010552757 IN - (Grishkevich) Department of Reconstructive and Plastic Surgery, A.V. Vishnevsky Institute of Surgery, Russian Academy of Medical Sciences, Moscow, Russian Federation CP - United States LG - English PT - Journal: Article EM - 201000 DD - 20101025

(186) Gross TP, Liu F. Hip resurfacing with the Biomet Hybrid ReCap-Magnum system: 7-year results. J Arthroplasty 2012; 27(9):1683-1689. Ref ID: 636 Abstract: The purpose of this study was to report our clinical outcome of a large series of metal-on-metal hip resurfacing arthroplasty (HRA) using the hybrid Biomet ReCap-Magnum system. This is a single-designer surgeon series with an average of 5 +/- 1 years. Seven hundred forty consecutive hybrid HRAs were performed in 653 patients. Kaplan-Meier survivorship with any revision as an end point was 96.4% at 7 years. Twenty-five (3.4%) cases were revised: 8 due to acetabular component loosening, 6 due to femoral neck facture, 4 due to failure of femoral component fixation, 2 due to deep infection, 2 due to adverse wear, 1 due to psoas tendonitis, 1 due to recurrent dislocation, and 1 due to unexplained pain. Biomet ReCap and Magnum HRA components with hybrid fixation methods showed excellent survivorship for a minimally selected young patient cohort at 7 years Notes: DA - 20120921 IS - 1532-8406 (Electronic) IS - 0883-5403 (Linking) LA - eng PT - Journal Article RN - 0 (Metals) SB - IM
[truncated: 803,931 more chars]
